# Supplementary material for: Identification of QTLs/ Candidate Genes for Seed Mineral Contents in Common Bean (Phaseolus vulgaris L.) Through Genotyping-by-Sequencing
Source: Front Genet. 2022 Mar 14;13:750814. doi: 10.3389/fgene.2022.750814 (PMC8982075; doi:10.3389/fgene.2022.750814)
Supplement: Supplementary file 1 [file Table6.xlsx]

## Sheet: Supplementary Table 6
Supplementary Table 6: List of identified candidate genes
	QTL name		Gene Name	Chromosome Name	Gene Start (bp)	Gene End (bp)	Strand	Description	PFAM ID	PFAM Description	Panther ID	Panther Description	KOG ID	KOG Desctiption	EC ID	EC Description	KO ID	KO Description	GO ID
QTL_Mn_1_12045066			Phvul.001G078900	Chr01	11948980	11954543	1	PTHR23023:SF37 - INDOLE-3-PYRUVATE MONOOXYGENASE YUCCA2-RELATED	PF00743	Flavin-binding monooxygenase-like	PTHR23023	DIMETHYLANILINE MONOOXYGENASE	KOG1399	Flavin-containing monooxygenase	EC 1.14.13.168	Indole-3-pyruvate monooxygenase.	K11816	YUCCA family monooxygenase [EC:1.14.13.-]	GO:0055114
QTL_Mn_1_12045066			Phvul.001G079000	Chr01	11964432	11965405	1	PTHR33374:SF6 - ARABINOGALACTAN PEPTIDE 16-RELATED	PF06376	Protein of unknown function (DUF1070)	PTHR33374
QTL_Mn_1_12045066			Phvul.001G079100	Chr01	11974629	11975961	-1	K02978 - small subunit ribosomal protein S27e (RP-S27e, RPS27)	PF01667	Ribosomal protein S27	PTHR11594	40S RIBOSOMAL PROTEIN S27	KOG1779	40s ribosomal protein S27			K02978	small subunit ribosomal protein S27e	GO:0006412
QTL_Mn_1_12045066			Phvul.001G079200	Chr01	12009949	12013454	-1	PTHR24089:SF294 - CALCIUM-BINDING TRANSPORTER-LIKE PROTEIN	PF13499	EF-hand domain pair	PTHR24089	FAMILY NOT NAMED					K14684	0
QTL_Mn_1_12045066			Phvul.001G079300	Chr01	12042117	12044858	-1				PTHR33680				EC 5.99.1.2	DNA topoisomerase.
QTL_Mn_1_12045066			Phvul.001G079400	Chr01	12077966	12080806	1	PF11145 - Protein of unknown function (DUF2921) (DUF2921)	PF11145	Protein of unknown function (DUF2921)	PTHR33389
QTL_Mn_1_12045066			Phvul.001G079500	Chr01	12106992	12108024	1	PF11145 - Protein of unknown function (DUF2921) (DUF2921)	PF11145	Protein of unknown function (DUF2921)	PTHR33389
QTL_Mn_1_12045066			Phvul.001G080566	Chr01	12138099	12138646	1	PTHR31087:SF3 - PROTEIN LURP-ONE-RELATED 16-RELATED	PF04525	Tubby C 2	PTHR31087	FAMILY NOT NAMED
QTL_Mg_1_13513718			Phvul.001G086700	Chr01	13420742	13429462	-1	K02148 - V-type H+-transporting ATPase subunit C (ATPeV1C, ATP6C)	PF03223	V-ATPase subunit C	PTHR10137	V-TYPE PROTON ATPASE SUBUNIT C	KOG2909	Vacuolar H+-ATPase V1 sector, subunit C			K02148	V-type H+-transporting ATPase subunit C [EC:3.6.3.14]	GO:0033180
QTL_Mg_1_13513718			Phvul.001G086800	Chr01	13447900	13451049	-1	PTHR31140:SF10 - B3 DOMAIN-CONTAINING TRANSCRIPTION FACTOR FUS3	PF02362	B3 DNA binding domain	PTHR31140	FAMILY NOT NAMED							GO:0003677
QTL_Mg_1_13513718			Phvul.001G086900	Chr01	13470909	13471924	1	3.4.22.69 - SARS coronavirus main proteinase / Severe acute respiratory syndrome coronavirus main protease			PTHR36899				EC 3.4.19.12	Ubiquitinyl hydrolase 1.
QTL_Mg_1_13513718			Phvul.001G087000	Chr01	13499958	13503158	1	PTHR24006:SF456 - GRR1-LIKE PROTEIN 1-RELATED	PF12937	F-box-like	PTHR24006	FAMILY NOT NAMED	KOG1947	Leucine rich repeat proteins, some proteins contain F-box					GO:0005515
QTL_Mg_1_13513718			Phvul.001G087100	Chr01	13512744	13515016	1	PF02893 - GRAM domain (GRAM)	PF02893	GRAM domain	PTHR31969	FAMILY NOT NAMED
QTL_Mg_1_13513718			Phvul.001G087200	Chr01	13526554	13529107	-1		PF05753	Translocon-associated protein beta (TRAPB)	PTHR12861	TRANSLOCON-ASSOCIATED PROTEIN, BETA SUBUNIT PRECURSOR (TRAP-BETA) (SIGNAL SEQUENCE RECEPTOR BETA SUBUNIT)							GO:0016021
QTL_Mg_1_13513718			Phvul.001G087300	Chr01	13547691	13551468	1	PTHR31717:SF3 - ZINC FINGER PROTEIN CONSTANS-LIKE 14-RELATED	PF06203	CCT motif	PTHR31717	FAMILY NOT NAMED							GO:0005515
QTL_Mg_1_13513718			Phvul.001G087500	Chr01	13586669	13590178	1	PTHR23032:SF2 - ENDOSOMAL TARGETING BRO1-LIKE DOMAIN-CONTAINING PROTEIN	PF03097	BRO1-like domain	PTHR23032	UNCHARACTERIZED
QTL_Mg_1_13577463			Phvul.001G087600	Chr01	13639243	13640935	-1	PTHR11615//PTHR11615:SF157 - NITRATE, FROMATE, IRON DEHYDROGENASE // SUBFAMILY NOT NAMED	PF04535	Domain of unknown function (DUF588)	PTHR11615	NITRATE, FROMATE, IRON DEHYDROGENASE
QTL_Mg_1_13577463			Phvul.001G087700	Chr01	13660927	13673987	1	PTHR22753:SF8 - ESTERASE/LIPASE/THIOESTERASE FAMILY PROTEIN-RELATED	PF03982	Diacylglycerol acyltransferase	PTHR22753	FAMILY NOT NAMED							GO:0016747
QTL_Mg_1_14603458			Phvul.001G089600	Chr01	14523662	14529382	1	K17260 - actin-related protein 2 (ACTR2, ARP2)			PTHR11937	ACTIN					K17260	0	GO:0034314
QTL_Mg_1_14603446			Phvul.001G089700	Chr01	14563432	14565708	1	PTHR31642:SF10 - ACYLTRANSFERASE-LIKE PROTEIN-RELATED	PF02458	Transferase family	PTHR31642	FAMILY NOT NAMED			EC 2.3.1.188	Omega-hydroxypalmitate O-feruloyl transferase.	K15400	0	GO:0016747
QTL_Mg_1_14603436			Phvul.001G089800	Chr01	14615782	14617287	-1	PTHR31614:SF3 - POLLEN OLE E 1 ALLERGEN AND EXTENSIN FAMILY PROTEIN	PF01190	Pollen proteins Ole e I like	PTHR31614	FAMILY NOT NAMED
QTL_Mg_1_14603456			Phvul.001G089900	Chr01	14661481	14663300	-1	PF03514 - GRAS domain family (GRAS) (1 of 55)	PF03514	GRAS domain family	PTHR31636	FAMILY NOT NAMED
QTL_Mg_1_14603438			Phvul.001G090000	Chr01	14686318	14693367	-1				PTHR35736
QTL_Mg_1_14603432			Phvul.001G090100	Chr01	14693474	14696128	1	PTHR12542//PTHR12542:SF31 - EXOCYST COMPLEX PROTEIN EXO70 // SUBFAMILY NOT NAMED	PF03081	Exo70 exocyst complex subunit	PTHR12542	EXOCYST COMPLEX PROTEIN EXO70	KOG2344	Exocyst component protein and related proteins			K07195	exocyst complex component 7	GO:0006887
QTL_Mg_1_14989418	QTL_Mg_1_14992813	QTL_Mg_1_14999140	Phvul.001G090800	Chr01	14976075	14981852	-1	PTHR27001:SF100 - PROTEIN KINASE FAMILY PROTEIN	PF00069	Protein kinase domain	PTHR27001		KOG1187	Serine/threonine protein kinase	EC 2.7.11.1	Non-specific serine/threonine protein kinase.			GO:0006468
QTL_Mg_1_14989418	QTL_Mg_1_14992813	QTL_Mg_1_14999140	Phvul.001G090900	Chr01	14989858	14998441	-1
QTL_Mg_1_14989418	QTL_Mg_1_14992813	QTL_Mg_1_14999140	Phvul.001G091000	Chr01	15011769	15014309	1	PTHR22958 - RELATED TO MULTIFUNCTIONAL CYCLIN-DEPENDENT KINASE-RELATED	PF03009	Glycerophosphoryl diester phosphodiesterase family	PTHR22958	RELATED TO MULTIFUNCTIONAL CYCLIN-DEPENDENT KINASE-RELATED	KOG2421	Predicted starch-binding protein	EC 3.1.4.46	Glycerophosphodiester phosphodiesterase.			GO:0008081
QTL_Fe_1_19220891			Phvul.001G098700	Chr01	19131375	19132241	-1	PF00168 - C2 domain (C2) (1 of 105)	PF00168	C2 domain	PTHR32246	FAMILY NOT NAMED							GO:0005515
QTL_Fe_1_19220891			Phvul.001G098801	Chr01	19156892	19160566	-1				PTHR33177
QTL_Fe_1_19220891			Phvul.001G098900	Chr01	19185314	19185652	1				PTHR33177
QTL_Fe_1_19220891			Phvul.001G099000	Chr01	19219165	19231655	1	K15340 - DNA cross-link repair 1A protein (DCLRE1A, SNM1A, PSO2)	PF07522	DNA repair metallo-beta-lactamase	PTHR23240	DNA CROSS-LINK REPAIR PROTEIN PSO2/SNM1-RELATED	KOG1361	Predicted hydrolase involved in interstrand cross-link repair			K15340	0
QTL_Fe_1_19220891			Phvul.001G099200	Chr01	19292481	19293770	-1	PTHR16007//PTHR16007:SF13 - EPIDIDYMAL MEMBRANE PROTEIN E9-RELATED // SUBFAMILY NOT NAMED	PF04819	Family of unknown function (DUF716)	PTHR16007	EPIDIDYMAL MEMBRANE PROTEIN E9-RELATED
QTL_Fe_1_19220891			Phvul.001G099300	Chr01	19307177	19309845	-1	PTHR19957//PTHR19957:SF138 - SYNTAXIN // SUBFAMILY NOT NAMED	PF05739	SNARE domain	PTHR19957	SYNTAXIN	KOG0811	SNARE protein PEP12/VAM3/Syntaxin 7/Syntaxin 17			K08488	syntaxin 7	GO:0005515
QTL_Mg_2_20002969			Phvul.002G098300	Chr02	19933154	19940285	-1		PF13410	Glutathione S-transferase, C-terminal domain	PTHR32419	FAMILY NOT NAMED	KOG2903	Predicted glutathione S-transferase					GO:0005515
QTL_Mg_2_20002969			Phvul.002G098400	Chr02	19933817	19935917	1
QTL_Mg_2_20002969			Phvul.002G098200	Chr02	19961334	19966696	1		PF07725	Leucine Rich Repeat	PTHR11017	LEUCINE-RICH REPEAT-CONTAINING PROTEIN	KOG4658	Apoptotic ATPase					GO:0007165
QTL_Mg_2_20002969			Phvul.002G098100	Chr02	19967124	19971042	-1	PTHR12042//PTHR12042:SF13 - LACTOSYLCERAMIDE 4-ALPHA-GALACTOSYLTRANSFERASE ALPHA- 1,4-GALACTOSYLTRANSFERASE // SUBFAMILY NOT NAMED	PF04488	Glycosyltransferase sugar-binding region containing DXD motif	PTHR12042	LACTOSYLCERAMIDE 4-ALPHA-GALACTOSYLTRANSFERASE (ALPHA- 1,4-GALACTOSYLTRANSFERASE)	KOG1928	Alpha-1,4-N-acetylglucosaminyltransferase
QTL_Mg_2_20002969			Phvul.002G098000	Chr02	19974739	19979177	-1	K07542 - phosphatidylinositol glycan, class V (PIGV)	PF04188	Mannosyltransferase (PIG-V))	PTHR12468	GPI MANNOSYLTRANSFERASE 2	KOG2647	Predicted Dolichyl-phosphate-mannose-protein mannosyltransferase			K07542	phosphatidylinositol glycan, class V [EC:2.4.1.-]	GO:0006506
QTL_Mg_2_20002969			Phvul.002G097900	Chr02	19999510	20003361	-1	PTHR10857//PTHR10857:SF32 - COPINE // SUBFAMILY NOT NAMED	PF10539	Development and cell death domain	PTHR10857	COPINE
QTL_Mg_2_20002969			Phvul.002G097800	Chr02	20045674	20048581	-1	2.5.1.3 - Thiamine-phosphate diphosphorylase / TMP pyrophosphorylase	PF01894	Uncharacterised protein family UPF0047	PTHR30615	UNCHARACTERIZED PROTEIN YJBQ-RELATED	KOG3267	Uncharacterized conserved protein	EC 2.5.1.3	Thiamine-phosphate diphosphorylase.
QTL_Mg_2_20002969			Phvul.002G097700	Chr02	20071449	20077729	1	PTHR11353:SF99 - CHAPERONIN 60 SUBUNIT ALPHA 2, CHLOROPLASTIC	PF00118	TCP-1/cpn60 chaperonin family	PTHR11353	CHAPERONIN							GO:0005524
QTL_Mg_2_20002969			Phvul.002G097600	Chr02	20084028	20086276	-1	PF12776 - Myb/SANT-like DNA-binding domain (Myb_DNA-bind_3) (1 of 47)	PF12776	Myb/SANT-like DNA-binding domain	PTHR31704	FAMILY NOT NAMED
QTL_Cu_2_30814539			Phvul.002G153400	Chr02	30723505	30728384	1	PTHR18896//PTHR18896:SF15 - PHOSPHOLIPASE D // SUBFAMILY NOT NAMED	PF00614	Phospholipase D Active site motif	PTHR18896	PHOSPHOLIPASE D			EC 3.1.4.4	Phospholipase D.	K01115	phospholipase D [EC:3.1.4.4]	GO:0003824
QTL_Cu_2_30814539			Phvul.002G153500	Chr02	30731697	30733075	1	1.1.1.133 - dTDP-4-dehydrorhamnose reductase / dTDP-6-deoxy-L-mannose dehydrogenase	PF04321	RmlD substrate binding domain	PTHR10366	NAD DEPENDENT EPIMERASE/DEHYDRATASE			EC 1.1.1.133	dTDP-4-dehydrorhamnose reductase.	K12451	3,5-epimerase/4-reductase [EC:5.1.3.- 1.1.1.-]
QTL_Cu_2_30814539			Phvul.002G153600	Chr02	30735320	30740648	-1	2.3.3.10 - Hydroxymethylglutaryl-CoA synthase / Hydroxymethylglutaryl coenzyme alpha-condensing enzyme	PF01154	Hydroxymethylglutaryl-coenzyme A synthase N terminal	PTHR11877	HYDROXYMETHYLGLUTARYL-COA SYNTHASE			EC 2.3.3.10	Hydroxymethylglutaryl-CoA synthase.	K01641	hydroxymethylglutaryl-CoA synthase [EC:2.3.3.10]	GO:0008299
QTL_Cu_2_30814539			Phvul.002G153700	Chr02	30751719	30764033	-1		PF05000	RNA polymerase Rpb1, domain 4	PTHR19376	DNA-DIRECTED RNA POLYMERASE			EC 2.7.7.6	DNA-directed RNA polymerase.	K16250	0	GO:0006351
QTL_Cu_2_30814539			Phvul.002G153800	Chr02	30781517	30790983	-1	K14295 - nuclear pore complex protein Nup50 (NUP50, NPAP60)	PF00638	RanBP1 domain	PTHR23138	RAN BINDING PROTEIN	KOG2724	Nuclear pore complex component NPAP60L/NUP50			K14295	nuclear pore complex protein Nup50	GO:0046907
QTL_Cu_2_30814539			Phvul.002G153900	Chr02	30798502	30799152	-1	PTHR31839:SF0 - DEHYDRATION-RESPONSIVE ELEMENT-BINDING PROTEIN 1E-RELATED	PF00847	AP2 domain	PTHR31839	FAMILY NOT NAMED							GO:0006355
QTL_Cu_2_30814539			Phvul.002G154000	Chr02	30842289	30842795	-1	PF00847 - AP2 domain (AP2)	PF00847	AP2 domain	PTHR31985	FAMILY NOT NAMED							GO:0006355
QTL_Cu_2_30814539			Phvul.002G154100	Chr02	30844933	30847468	-1				PTHR36338
QTL_Cu_2_30814539			Phvul.002G154200	Chr02	30848416	30852969	-1	K03355 - anaphase-promoting complex subunit 8 (APC8, CDC23)	PF13176	Tetratricopeptide repeat	PTHR12558	CELL DIVISION CYCLE 16,23,27					K03355	anaphase-promoting complex subunit 8	GO:0005515
QTL_Cu_2_30814539			Phvul.002G154300	Chr02	30857675	30868349	1	PTHR31764:SF0 - PROTEIN HAPLESS 2	PF10699	Male gamete fusion factor	PTHR31764	FAMILY NOT NAMED
QTL_Cu_2_30814539			Phvul.002G154400	Chr02	30868684	30872297	-1	PTHR24286:SF11 - CYTOCHROME P450, FAMILY 87, SUBFAMILY A, POLYPEPTIDE 2	PF00067	Cytochrome P450	PTHR24286	FAMILY NOT NAMED	KOG0157	Cytochrome P450 CYP4/CYP19/CYP26 subfamilies					GO:0055114
QTL_Cu_2_30814539			Phvul.002G154500	Chr02	30882375	30883587	-1	K08912 - light-harvesting complex II chlorophyll a/b binding protein 1 (LHCB1)	PF00504	Chlorophyll A-B binding protein	PTHR21649	CHLOROPHYLL A/B BINDING PROTEIN					K08912	light-harvesting complex II chlorophyll a/b binding protein 1	GO:0016020
QTL_Cu_2_30814539			Phvul.002G154600	Chr02	30896500	30898621	1	PTHR11206:SF127 - MATE EFFLUX FAMILY PROTEIN	PF01554	MatE	PTHR11206	MULTIDRUG RESISTANCE PROTEIN	KOG1347	Uncharacterized membrane protein, predicted efflux pump			K03327	multidrug resistance protein, MATE family	GO:0055085
QTL_Cu_2_30814539			Phvul.002G154700	Chr02	30906653	30907912	1	K08912 - light-harvesting complex II chlorophyll a/b binding protein 1 (LHCB1)	PF00504	Chlorophyll A-B binding protein	PTHR21649	CHLOROPHYLL A/B BINDING PROTEIN					K08912	light-harvesting complex II chlorophyll a/b binding protein 1	GO:0016020
QTL_Zn_2_37819199			Phvul.002G210400	Chr02	37729179	37734952	1	3.6.3.39 - Lipopolysaccharide-transporting ATPase	PF00005	ABC transporter	PTHR19241	ATP-BINDING CASSETTE TRANSPORTER	KOG0061	Transporter, ABC superfamily (Breast cancer resistance protein)	EC 3.6.3.39	Lipopolysaccharide-transporting ATPase.			GO:0016887
QTL_Zn_2_37819199			Phvul.002G210500	Chr02	37746541	37750458	1	3.6.3.39 - Lipopolysaccharide-transporting ATPase	PF00005	ABC transporter	PTHR19241	ATP-BINDING CASSETTE TRANSPORTER	KOG0061	Transporter, ABC superfamily (Breast cancer resistance protein)	EC 3.6.3.39	Lipopolysaccharide-transporting ATPase.			GO:0016887
QTL_Zn_2_37819199			Phvul.002G210600	Chr02	37769769	37772725	-1	3.6.3.36 - Taurine-transporting ATPase	PF00005	ABC transporter	PTHR19241	ATP-BINDING CASSETTE TRANSPORTER	KOG0061	Transporter, ABC superfamily (Breast cancer resistance protein)	EC 3.6.3.36	Taurine-transporting ATPase.			GO:0016887
QTL_Zn_2_37819199			Phvul.002G210700	Chr02	37776912	37782162	-1		PF01061	ABC-2 type transporter	PTHR19241	ATP-BINDING CASSETTE TRANSPORTER			EC 3.6.3.36	Taurine-transporting ATPase.			GO:0016020
QTL_Zn_2_37819199			Phvul.002G210750	Chr02	37805488	37808899	1	2.5.1.74 - 1,4-dihydroxy-2-naphthoate polyprenyltransferase	PF01040	UbiA prenyltransferase family	PTHR13929	1,4-DIHYDROXY-2-NAPHTHOATE OCTAPRENYLTRANSFERASE	KOG4581	Predicted membrane protein	EC 2.5.1.74	1,4-dihydroxy-2-naphthoate polyprenyltransferase.	K02548	1,4-dihydroxy-2-naphthoate octaprenyltransferase [EC:2.5.1.74 2.5.1.-]	GO:0016021
QTL_Zn_2_37819199			Phvul.002G210800	Chr02	37809824	37816010	1	KOG2296 - Integral membrane protein	PF04791	LMBR1-like membrane protein	PTHR21355	UNCHARACTERIZED	KOG2296	Integral membrane protein
QTL_Zn_2_37819199			Phvul.002G210900	Chr02	37816688	37821236	1	4.1.99.12 - 3,4-dihydroxy-2-butanone-4-phosphate synthase / L-3,4-dihydroxybutan-2-one-4-phosphate synthase	PF00925	GTP cyclohydrolase II	PTHR21327	GTP CYCLOHYDROLASE II-RELATED	KOG1284	Bifunctional GTP cyclohydrolase II/3,4-dihydroxy-2butanone-4-phosphate synthase	EC 3.5.4.25	GTP cyclohydrolase II.	K14652	3,4-dihydroxy 2-butanone 4-phosphate synthase / GTP cyclohydrolase II [EC:4.1.99.12 3.5.4.25]	GO:0009231
QTL_Zn_2_37819199			Phvul.002G211000	Chr02	37824662	37825389	1
QTL_Zn_2_37819199			Phvul.002G211100	Chr02	37830723	37832393	-1	PTHR33735:SF4 - EXPRESSED PROTEIN			PTHR33735
QTL_Zn_2_37819199			Phvul.002G211200	Chr02	37842878	37846869	1	PTHR36066:SF2 - TRANSCRIPTION FACTOR SAC51-RELATED			PTHR36066
QTL_Zn_2_37819199			Phvul.002G211300	Chr02	37844111	37844486	1	PTHR35281:SF1 - CONSERVED PEPTIDE UPSTREAM OPEN READING FRAME 37-RELATED			PTHR35281
QTL_Zn_2_37819199			Phvul.002G211400	Chr02	37848807	37852200	-1	PTHR32370:SF6 - ROOT PHOTOTROPISM PROTEIN 3	PF03000	NPH3 family	PTHR32370	FAMILY NOT NAMED							GO:0016567
QTL_Zn_2_37819199			Phvul.002G211500	Chr02	37863083	37865132	-1	PTHR10209//PTHR10209:SF167 - OXIDOREDUCTASE, 2OG-FE II OXYGENASE FAMILY PROTEIN // SUBFAMILY NOT NAMED	PF03171	2OG-Fe(II) oxygenase superfamily	PTHR10209	OXIDOREDUCTASE, 2OG-FE(II) OXYGENASE FAMILY PROTEIN	KOG0143	Iron/ascorbate family oxidoreductases	EC 1.14.11.9	Flavanone 3-dioxygenase.			GO:0055114
QTL_Zn_2_37819199			Phvul.002G211600	Chr02	37869505	37870482	-1	PTHR14155//PTHR14155:SF101 - RING FINGER DOMAIN-CONTAINING // SUBFAMILY NOT NAMED	PF13639	Ring finger domain	PTHR14155	RING FINGER DOMAIN-CONTAINING	KOG1493	Anaphase-promoting complex (APC), subunit 11					GO:0008270
QTL_Zn_2_37819199			Phvul.002G211700	Chr02	37871262	37876809	-1		PF05378	Hydantoinase/oxoprolinase N-terminal region	PTHR11365	5-OXOPROLINASE RELATED			EC 3.5.2.9	5-oxoprolinase (ATP-hydrolyzing).	K01469	5-oxoprolinase (ATP-hydrolysing) [EC:3.5.2.9]	GO:0016787
QTL_Zn_2_37819199			Phvul.002G211800	Chr02	37882508	37882777	-1
QTL_Zn_2_37819199			Phvul.002G211900	Chr02	37904904	37905530	-1				PTHR33088
QTL_Cu_2_38960183			Phvul.002G219200	Chr02	38884430	38884957	1	4.2.3.25 - S-linalool synthase / LIS	PF01397	Terpene synthase, N-terminal domain	PTHR31225	FAMILY NOT NAMED			EC 4.2.3.25	S-linalool synthase.			GO:0016829
QTL_Cu_2_38960183			Phvul.002G219300	Chr02	38915078	38918032	1	4.2.3.48 - (3S,6E)-nerolidol synthase / Nerolidol synthase	PF01397	Terpene synthase, N-terminal domain	PTHR31225	FAMILY NOT NAMED			EC 4.2.3.48	(3S,6E)-nerolidol synthase.	K15086	0	GO:0016829
QTL_Cu_2_38960183			Phvul.002G219400	Chr02	38944145	38945609	-1	PF01535//PF13041 - PPR repeat (PPR) // PPR repeat family (PPR_2) (1 of 197)	PF01535	PPR repeat	PTHR24015	FAMILY NOT NAMED
QTL_Cu_2_38960183			Phvul.002G219500	Chr02	38950270	38951603	-1	PF04398 - Protein of unknown function, DUF538 (DUF538)	PF04398	Protein of unknown function, DUF538	PTHR31676	FAMILY NOT NAMED
QTL_Cu_2_38960183			Phvul.002G219600	Chr02	38960918	38964596	1	PTHR16223:SF21 - TRANSCRIPTION FACTOR BHLH103-RELATED			PTHR16223	FAMILY NOT NAMED
QTL_Cu_2_38960183			Phvul.002G219700	Chr02	38974396	38977543	-1	K03809 - NAD(P)H dehydrogenase (quinone) (wrbA)	PF03358	NADPH-dependent FMN reductase	PTHR30546	FLAVODOXIN-RELATED PROTEIN WRBA-RELATED	KOG3135	1,4-benzoquinone reductase-like; Trp repressor binding protein-like/protoplast-secreted protein	EC 1.6.5.2	NAD(P)H dehydrogenase (quinone).	K03809	Trp repressor binding protein	GO:0016491
QTL_Cu_2_38960183			Phvul.002G219800	Chr02	38989313	38991006	-1	PTHR23315:SF112 - U-BOX DOMAIN-CONTAINING PROTEIN 8	PF04564	U-box domain	PTHR23315	BETA CATENIN-RELATED ARMADILLO REPEAT-CONTAINING			EC 6.3.2.19	Ubiquitin--protein ligase.			GO:0016567
QTL_Cu_2_38960183			Phvul.002G219900	Chr02	39021182	39027355	1	PF00954//PF01453//PF07714//PF08276//PF11883 - S-locus glycoprotein domain (S_locus_glycop) // D-mannose binding lectin (B_lectin) // Protein tyrosine kinase (Pkinase_Tyr) // PAN-like domain (PAN_2) // Domain of unknown function (DUF3403) (DUF3403)	PF11883	Domain of unknown function (DUF3403)	PTHR27002		KOG1187	Serine/threonine protein kinase	EC 2.7.11.1	Non-specific serine/threonine protein kinase.			GO:0004674
QTL_Cu_2_38960183			Phvul.002G220000	Chr02	39027826	39039538	-1	PTHR27002:SF100 - G-TYPE LECTIN S-RECEPTOR-LIKE SERINE/THREONINE-PROTEIN KINASE RKS1	PF08276	PAN-like domain	PTHR27002		KOG1187	Serine/threonine protein kinase	EC 2.7.11.1	Non-specific serine/threonine protein kinase.			GO:0048544
QTL_Cu_2_38960183			Phvul.002G220100	Chr02	39030166	39031725	-1	PTHR27002:SF100 - G-TYPE LECTIN S-RECEPTOR-LIKE SERINE/THREONINE-PROTEIN KINASE RKS1	PF08276	PAN-like domain	PTHR27002				EC 2.7.11.1	Non-specific serine/threonine protein kinase.			GO:0048544
QTL_Cu_2_38960183			Phvul.002G220200	Chr02	39046782	39054785	-1	PTHR27002:SF93 - RECEPTOR-LIKE SERINE/THREONINE-PROTEIN KINASE SD1-6-RELATED	PF12398	Receptor serine/threonine kinase	PTHR27002		KOG1187	Serine/threonine protein kinase	EC 2.7.11.1	Non-specific serine/threonine protein kinase.			GO:0004674
QTL_Mg_2_39493707			Phvul.002G222600	Chr02	39401445	39406834	-1	PF07887 - Calmodulin binding protein-like (Calmodulin_bind)	PF07887	Calmodulin binding protein-like	PTHR31713	FAMILY NOT NAMED							GO:0006950
QTL_Mg_2_39493707			Phvul.002G222700	Chr02	39412904	39414637	-1	K14851 - ribosomal RNA-processing protein 17 (RRP17, NOL12)	PF09805	Nucleolar protein 12 (25kDa)	PTHR14577	UNCHARACTERIZED	KOG4709	Uncharacterized conserved protein			K14851	ribosomal RNA-processing protein 17
QTL_Mg_2_39493707			Phvul.002G222800	Chr02	39416802	39420989	1	K04718 - sphingosine kinase (SPHK)	PF00781	Diacylglycerol kinase catalytic domain	PTHR12358	SPHINGOSINE KINASE	KOG1116	Sphingosine kinase, involved in sphingolipid metabolism	EC 2.7.1.91	Sphinganine kinase.	K04718	sphingosine kinase [EC:2.7.1.91]	GO:0016301
QTL_Mg_2_39493707			Phvul.002G222900	Chr02	39423208	39424690	1	PTHR19957//PTHR19957:SF125 - SYNTAXIN // SUBFAMILY NOT NAMED	PF05739	SNARE domain	PTHR19957	SYNTAXIN	KOG0810	SNARE protein Syntaxin 1 and related proteins			K08486	syntaxin 1B/2/3	GO:0005515
QTL_Mg_2_39493707			Phvul.002G223000	Chr02	39427049	39428956	-1	K12184 - ESCRT-I complex subunit VPS28 (VPS28)	PF03997	VPS28 protein	PTHR12937	VACUOLAR PROTEIN SORTING 28, ISOFORM 2 (VPS28)	KOG3284	Vacuolar sorting protein VPS28			K12184	ESCRT-I complex subunit VPS28
QTL_Mg_2_39493707			Phvul.002G223100	Chr02	39432436	39441763	1		PF02265	S1/P1 Nuclease	PTHR33146				EC 3.1.30.1	Aspergillus nuclease S(1).			GO:0006308
QTL_Mg_2_39493707			Phvul.002G223200	Chr02	39461990	39464122	1	K02882 - large subunit ribosomal protein L18Ae (RP-L18Ae, RPL18A)	PF01775	Ribosomal L18ae/LX protein domain	PTHR10052	60S RIBOSOMAL PROTEIN L18A	KOG0829	60S ribosomal protein L18A			K02882	large subunit ribosomal protein L18Ae	GO:0006412
QTL_Mg_2_39493707			Phvul.002G223300	Chr02	39466477	39468933	1	PTHR22835//PTHR22835:SF219 - ZINC FINGER FYVE DOMAIN CONTAINING PROTEIN // SUBFAMILY NOT NAMED	PF00657	GDSL-like Lipase/Acylhydrolase	PTHR22835	ZINC FINGER FYVE DOMAIN CONTAINING PROTEIN			EC 3.2.1.51	Alpha-L-fucosidase.			GO:0016788
QTL_Mg_2_39493707			Phvul.002G223400	Chr02	39470750	39474759	1	K17871 - NADH:ubiquinone reductase (non-electrogenic) (ndh1)	PF00070	Pyridine nucleotide-disulphide oxidoreductase	PTHR22912	DISULFIDE OXIDOREDUCTASE			EC 1.6.5.9	NADH:ubiquinone reductase (non-electrogenic).	K17871	0	GO:0055114
QTL_Mg_2_39493707			Phvul.002G223500	Chr02	39481955	39482143	-1				PTHR36615
QTL_Mg_2_39493707			Phvul.002G223600	Chr02	39491672	39494669	1	PTHR20854//PTHR20854:SF33 - INOSITOL MONOPHOSPHATASE // SUBFAMILY NOT NAMED	PF00459	Inositol monophosphatase family	PTHR20854	INOSITOL MONOPHOSPHATASE	KOG1528	Salt-sensitive 3'-phosphoadenosine-5'-phosphatase HAL2/SAL1	EC 3.1.3.7	3'(2'),5'-bisphosphate nucleotidase.	K01082	3'(2'), 5'-bisphosphate nucleotidase [EC:3.1.3.7]	GO:0046854
QTL_Mg_2_39493707			Phvul.002G223700	Chr02	39495850	39501401	-1	PTHR10687:SF22 - SECRETORY CARRIER-ASSOCIATED MEMBRANE PROTEIN 1-RELATED	PF04144	SCAMP family	PTHR10687	SECRETORY CARRIER-ASSOCIATED MEMBRANE PROTEIN (SCAMP)	KOG3088	Secretory carrier membrane protein					GO:0016021
QTL_Mg_2_39493707			Phvul.002G223800	Chr02	39504515	39511741	-1	PF05212 - Protein of unknown function (DUF707) (DUF707)	PF05212	Protein of unknown function (DUF707)	PTHR31210	FAMILY NOT NAMED
QTL_Mg_2_39493707			Phvul.002G223900	Chr02	39527938	39533458	-1	PTHR13317:SF4 - TRANSMEMBRANE ANTERIOR POSTERIOR TRANSFORMATION PROTEIN 1 HOMOLOG	PF05346	Eukaryotic membrane protein family	PTHR13317	UNCHARACTERIZED
QTL_Mg_2_39493707			Phvul.002G224000	Chr02	39537419	39542409	-1	PTHR15398//PTHR15398:SF5 - BROMODOMAIN-CONTAINING PROTEIN 8 // SUBFAMILY NOT NAMED	PF00439	Bromodomain	PTHR15398	BROMODOMAIN-CONTAINING PROTEIN 8							GO:0005515
QTL_Mg_2_39493707			Phvul.002G224100	Chr02	39551949	39563263	-1		PF00400	WD domain, G-beta repeat	PTHR19845	KATANIN P80 SUBUNIT					K18643	0	GO:0005515
QTL_Mg_2_39493707			Phvul.002G224200	Chr02	39567781	39576839	-1		PF08263	Leucine rich repeat N-terminal domain	PTHR27001		KOG1187	Serine/threonine protein kinase	EC 2.7.10.2	Non-specific protein-tyrosine kinase.			GO:0006468
QTL_Mg_2_39493707			Phvul.002G224300	Chr02	39585274	39586759	1				PTHR33871
QTL_Cu_2_39678800			Phvul.002G224400	Chr02	39595017	39595794	-1	PTHR32285:SF7 - PROTEIN TRICHOME BIREFRINGENCE-LIKE 3	PF13839	GDSL/SGNH-like Acyl-Esterase family found in Pmr5 and Cas1p	PTHR32285	FAMILY NOT NAMED
QTL_Cu_2_39678800			Phvul.002G224500	Chr02	39602185	39606153	-1				PTHR33728
QTL_Cu_2_39678800			Phvul.002G224601	Chr02	39628554	39636892	1	PTHR10799:SF705 - SNF2 , HELICASE AND ZINC-FINGER DOMAIN-CONTAINING PROTEIN-RELATED	PF00176	SNF2 family N-terminal domain	PTHR10799	SWI/SNF-RELATED MATRIX-ASSOCIATED ACTIN-DEPENDENT REGULATOR OF CHROMATIN SUBFAMILY-RELATED			EC 3.6.4.12	DNA helicase.			GO:0005524
QTL_Cu_2_39678800			Phvul.002G224700	Chr02	39638139	39639631	-1	PTHR11614:SF20 - ALPHA/BETA-HYDROLASE-LIKE PROTEIN	PF12695	Alpha/beta hydrolase family	PTHR11614	PHOSPHOLIPASE-RELATED	KOG1455	Lysophospholipase	EC 2.3.1.22	2-acylglycerol O-acyltransferase.
QTL_Cu_2_39678800			Phvul.002G224800	Chr02	39657521	39661605	1		PF00450	Serine carboxypeptidase	PTHR11802	SERINE PROTEASE FAMILY S10 SERINE CARBOXYPEPTIDASE			EC 3.4.16.6	Carboxypeptidase D.	K16297	0	GO:0006508
QTL_Cu_2_39678800			Phvul.002G224900	Chr02	39668002	39669949	-1	PTHR31719:SF9 - ATNAC2-RELATED	PF02365	No apical meristem (NAM) protein	PTHR31719	FAMILY NOT NAMED							GO:0006355
QTL_Cu_2_39678800			Phvul.002G225400	Chr02	39699274	39700245	-1	PTHR31008 - COP1-INTERACTING PROTEIN-RELATED	PF01582	TIR domain	PTHR31008	COP1-INTERACTING PROTEIN-RELATED							GO:0007165
QTL_Cu_2_39678800			Phvul.002G225500	Chr02	39713674	39718103	1				PTHR31342	FAMILY NOT NAMED
QTL_Cu_2_39678800			Phvul.002G225600	Chr02	39726441	39728225	-1	1.14.18.1 - Tyrosinase / Tyrosine-dopa oxidase	PF12142	Polyphenol oxidase middle domain	PTHR11474	TYROSINASE			EC 1.14.18.1	Tyrosinase.	K00422	polyphenol oxidase [EC:1.10.3.1]	GO:0055114
QTL_Cu_2_39678800			Phvul.002G225801	Chr02	39731833	39748394	-1	PTHR12428//PTHR12428:SF23 - OXA1 // SUBFAMILY NOT NAMED	PF02096	60Kd inner membrane protein	PTHR12428	OXA1	KOG1239	Inner membrane protein translocase involved in respiratory chain assembly			K03217	preprotein translocase subunit YidC	GO:0051205
QTL_Cu_2_39678800			Phvul.002G226000	Chr02	39751610	39756313	1	PF06749 - Protein of unknown function (DUF1218) (DUF1218)	PF06749	Protein of unknown function (DUF1218)	PTHR31769	FAMILY NOT NAMED
QTL_Cu_2_39678800			Phvul.002G226100	Chr02	39760216	39762026	-1	PF02701 - Dof domain, zinc finger (zf-Dof) (1 of 41)	PF02701	Dof domain, zinc finger	PTHR31992	FAMILY NOT NAMED							GO:0006355
QTL_Cu_2_39678800			Phvul.002G226200	Chr02	39773491	39774809	-1
QTL_Mg_2_40920106			Phvul.002G237100	Chr02	40822489	40828872	-1		PF01195	Peptidyl-tRNA hydrolase	PTHR17224	PEPTIDYL-TRNA HYDROLASE	KOG2255	Peptidyl-tRNA hydrolase	EC 3.1.1.29	Aminoacyl-tRNA hydrolase.	K01056	peptidyl-tRNA hydrolase, PTH1 family [EC:3.1.1.29]	GO:0004045
QTL_Mg_2_40920106			Phvul.002G237300	Chr02	40855450	40856190	1	PTHR31194//PTHR31194:SF5 - SHN SHINE , DNA BINDING / TRANSCRIPTION FACTOR // SUBFAMILY NOT NAMED	PF00847	AP2 domain	PTHR31194	SHN (SHINE), DNA BINDING / TRANSCRIPTION FACTOR					K09286	EREBP-like factor	GO:0006355
QTL_Mg_2_40920106			Phvul.002G237400	Chr02	40862997	40865407	-1		PF03953	Tubulin C-terminal domain	PTHR11588	TUBULIN							GO:0003924
QTL_Mg_2_40920106			Phvul.002G237500	Chr02	40881005	40884422	1	PTHR24055:SF196 - MITOGEN-ACTIVATED PROTEIN KINASE 14-RELATED	PF06293	Lipopolysaccharide kinase (Kdo/WaaP) family	PTHR24055	MITOGEN-ACTIVATED PROTEIN KINASE			EC 2.7.11.24	Mitogen-activated protein kinase.	K04371	extracellular signal-regulated kinase 1/2 [EC:2.7.11.24]	GO:0016773
QTL_Mg_2_40920106			Phvul.002G237800	Chr02	40901140	40902993	-1	PF01535//PF13041//PF14432 - PPR repeat (PPR) // PPR repeat family (PPR_2) // DYW family of nucleic acid deaminases (DYW_deaminase) (1 of 79)	PF14432	DYW family of nucleic acid deaminases	PTHR24015	FAMILY NOT NAMED
QTL_Mg_2_40920106			Phvul.002G237900	Chr02	40904110	40913264	1	6.2.1.1 - Acetate--CoA ligase / Acyl-activating enzyme	PF13193	AMP-binding enzyme C-terminal domain	PTHR24095	FAMILY NOT NAMED			EC 6.2.1.1	Acetate--CoA ligase.			GO:0008152
QTL_Mg_2_40920106			Phvul.002G238000	Chr02	40914094	40917047	1				PTHR34669
QTL_Mg_2_40920106			Phvul.002G238100	Chr02	40921529	40925633	1	PTHR24089:SF266 - MITOCHONDRIAL DICARBOXYLATE/TRICARBOXYLATE TRANSPORTER DTC	PF00153	Mitochondrial carrier protein	PTHR24089	FAMILY NOT NAMED	KOG0759	Mitochondrial oxoglutarate/malate carrier proteins			K15104	0
QTL_Mg_2_40920106			Phvul.002G238200	Chr02	40927080	40939376	1		PF05057	Putative serine esterase (DUF676)	PTHR12482	UNCHARACTERIZED	KOG4372	Predicted alpha/beta hydrolase
QTL_Mg_2_40920106			Phvul.002G238300	Chr02	40946860	40950265	1		PF00244	14-3-3 protein	PTHR18860	14-3-3 PROTEIN	KOG0841	Multifunctional chaperone (14-3-3 family)			K06630	tyrosine 3-monooxygenase/tryptophan 5-monooxygenase activation protein	GO:0019904
QTL_Mg_2_40920106			Phvul.002G238500	Chr02	40972675	40981170	-1	PTHR12902 - WASP-1			PTHR12902	WASP-1							GO:0030036
QTL_Mg_2_41116882			Phvul.002G238700	Chr02	41033947	41034715	-1	PF14009 - Domain of unknown function (DUF4228) (DUF4228) (1 of 38)	PF14009	Domain of unknown function (DUF4228)	PTHR33052
QTL_Mg_2_41116882			Phvul.002G238800	Chr02	41047484	41049313	1	PTHR24347:SF168 - CBL-INTERACTING SERINE/THREONINE-PROTEIN KINASE 12-RELATED	PF14531	Kinase-like	PTHR24347	SERINE/THREONINE-PROTEIN KINASE	KOG0583	Serine/threonine protein kinase	EC 2.7.11.1	Non-specific serine/threonine protein kinase.			GO:0007165
QTL_Mg_2_41116882	QTL_Cu_2_41160625		Phvul.002G238900	Chr02	41055039	41061859	-1		PF08263	Leucine rich repeat N-terminal domain	PTHR27001		KOG1187	Serine/threonine protein kinase	EC 2.7.11.1	Non-specific serine/threonine protein kinase.			GO:0006468
QTL_Mg_2_41116882	QTL_Cu_2_41160625		Phvul.002G239000	Chr02	41070273	41070550	1
QTL_Mg_2_41116882	QTL_Cu_2_41160625		Phvul.002G239100	Chr02	41079682	41088009	1		PF00249	Myb-like DNA-binding domain	PTHR31314	FAMILY NOT NAMED
QTL_Mg_2_41116882	QTL_Cu_2_41160625		Phvul.002G239200	Chr02	41098105	41102067	-1	PTHR33671:SF3 - F28N24.8 PROTEIN	PF05097	Protein of unknown function (DUF688)	PTHR33671
QTL_Mg_2_41116882	QTL_Cu_2_41160625		Phvul.002G239300	Chr02	41104915	41106840	1	PTHR12411:SF371 - CATHEPSIN O	PF08246	Cathepsin propeptide inhibitor domain (I29)	PTHR12411	CYSTEINE PROTEASE FAMILY C1-RELATED	KOG1542	Cysteine proteinase Cathepsin F	EC 3.4.22.14	Actinidain.			GO:0008234
QTL_Mg_2_41116882	QTL_Cu_2_41160625	QTL_Cu_2_41211297	Phvul.002G239400	Chr02	41114369	41117582	1	PTHR27000:SF154 - LEUCINE-RICH REPEAT RECEPTOR-LIKE PROTEIN KINASE	PF13855	Leucine rich repeat	PTHR27000		KOG1187	Serine/threonine protein kinase	EC 2.7.11.1	Non-specific serine/threonine protein kinase.			GO:0005515
QTL_Mg_2_41116882	QTL_Cu_2_41160625	QTL_Cu_2_41211297	Phvul.002G239500	Chr02	41146070	41149960	1	PTHR11119//PTHR11119:SF47 - XANTHINE-URACIL / VITAMIN C PERMEASE FAMILY MEMBER // SUBFAMILY NOT NAMED	PF00860	Permease family	PTHR11119	XANTHINE-URACIL / VITAMIN C PERMEASE FAMILY MEMBER					K14611	0	GO:0055085
QTL_Mg_2_41116882	QTL_Cu_2_41160625	QTL_Cu_2_41211297	Phvul.002G239600	Chr02	41166374	41173478	1		PF07714	Protein tyrosine kinase	PTHR24057	GLYCOGEN SYNTHASE KINASE-3 ALPHA			EC 2.7.11.1	Non-specific serine/threonine protein kinase.	K14502	protein brassinosteroid insensitive 2 [EC:2.7.11.1]	GO:0006468
QTL_Mg_2_41116882	QTL_Cu_2_41160625	QTL_Cu_2_41211297	Phvul.002G239700	Chr02	41182352	41186069	1	PTHR23012//PTHR23012:SF76 - MEMBRANE ASSOCIATED RING FINGER // SUBFAMILY NOT NAMED	PF12906	RING-variant domain	PTHR23012	MEMBRANE ASSOCIATED RING FINGER							GO:0008270
QTL_Mg_2_41116882	QTL_Cu_2_41160625	QTL_Cu_2_41211297	Phvul.002G240000	Chr02	41199686	41202904	1	PF01535//PF13041//PF14432 - PPR repeat (PPR) // PPR repeat family (PPR_2) // DYW family of nucleic acid deaminases (DYW_deaminase) (1 of 79)	PF14432	DYW family of nucleic acid deaminases	PTHR24015	FAMILY NOT NAMED
QTL_Mg_2_41116882	QTL_Cu_2_41160625	QTL_Cu_2_41211297	Phvul.002G240100	Chr02	41208776	41210011	-1	PTHR27000:SF131 - RECEPTOR LIKE PROTEIN 55	PF00560	Leucine Rich Repeat	PTHR27000				EC 2.7.11.1	Non-specific serine/threonine protein kinase.			GO:0005515
	QTL_Cu_2_41160625	QTL_Cu_2_41211297	Phvul.002G240200	Chr02	41211632	41217591	-1	PTHR13301:SF31 - CELLULOSE SYNTHASE A CATALYTIC SUBUNIT 8 [UDP-FORMING]	PF13632	Glycosyl transferase family group 2	PTHR13301	X-BOX TRANSCRIPTION FACTOR-RELATED			EC 2.4.1.12	Cellulose synthase (UDP-forming).	K10999	cellulose synthase A [EC:2.4.1.12]
	QTL_Cu_2_41160625	QTL_Cu_2_41211297	Phvul.002G240300	Chr02	41221198	41235103	-1		PF00400	WD domain, G-beta repeat	PTHR22847	WD40 REPEAT PROTEIN	KOG0279	G protein beta subunit-like protein					GO:0005515
	QTL_Cu_2_41160625	QTL_Cu_2_41211297	Phvul.002G240304	Chr02	41237986	41239198	-1	PF00892 - EamA-like transporter family (EamA) (1 of 74)	PF00892	EamA-like transporter family	PTHR31218	FAMILY NOT NAMED							GO:0016021
	QTL_Cu_2_41160625	QTL_Cu_2_41211297	Phvul.002G240308	Chr02	41239244	41240568	-1	PF00892 - EamA-like transporter family (EamA) (1 of 74)	PF00892	EamA-like transporter family	PTHR31218	FAMILY NOT NAMED							GO:0016021
	QTL_Cu_2_41160625	QTL_Cu_2_41211297	Phvul.002G240500	Chr02	41258623	41259534	-1
		QTL_Cu_2_41211297	Phvul.002G240600	Chr02	41261592	41265793	1	PF02620 - Uncharacterized ACR, COG1399 (DUF177)	PF02620	Uncharacterized ACR, COG1399	PTHR34374
		QTL_Cu_2_41211297	Phvul.002G240700	Chr02	41270392	41271144	-1	PF07939 - Protein of unknown function (DUF1685) (DUF1685)	PF07939	Protein of unknown function (DUF1685)	PTHR31865	FAMILY NOT NAMED
		QTL_Cu_2_41211297	Phvul.002G240800	Chr02	41302408	41303825	1				PTHR31945	FAMILY NOT NAMED
QTL_Mg_2_42540272			Phvul.002G252200	Chr02	42442215	42444464	1	PTHR31476:SF6 - EMB	PF11955	Plant organelle RNA recognition domain	PTHR31476	FAMILY NOT NAMED
QTL_Mg_2_42540272			Phvul.002G252300	Chr02	42444835	42458196	-1	K10610 - DNA damage-binding protein 1 (DDB1)	PF03178	CPSF A subunit region	PTHR10644	DNA REPAIR/RNA PROCESSING CPSF FAMILY					K10610	DNA damage-binding protein 1	GO:0005634
QTL_Mg_2_42540272			Phvul.002G252400	Chr02	42461122	42463930	-1	PTHR32227:SF51 - CARBOHYDRATE-BINDING X8 DOMAIN-CONTAINING PROTEIN	PF07983	X8 domain	PTHR32227	FAMILY NOT NAMED			EC 3.2.1.39	Glucan endo-1,3-beta-D-glucosidase.
QTL_Mg_2_42540272			Phvul.002G252500	Chr02	42475634	42477985	1	PTHR24351:SF60 - PROTEIN KINASE PINOID	PF07714	Protein tyrosine kinase	PTHR24351	RIBOSOMAL PROTEIN S6 KINASE			EC 2.7.11.1	Non-specific serine/threonine protein kinase.			GO:0006468
QTL_Mg_2_42540272			Phvul.002G252600	Chr02	42481293	42482267	-1	K02370 - alpha-1,4-N-acetylglucosaminyltransferase EXTL3 (EXTL3)	PF09258	Glycosyl transferase family 64 domain	PTHR11062	EXOSTOSIN (HEPARAN SULFATE GLYCOSYLTRANSFERASE)-RELATED			EC 2.4.1.225	N-acetylglucosaminyl-proteoglycan 4-beta-glucuronosyltransferase.	K02370	alpha-1,4-N-acetylglucosaminyltransferase EXTL3 [EC:2.4.1.223 2.4.1.224]	GO:0016021
QTL_Mg_2_42540272			Phvul.002G252700	Chr02	42495815	42497095	-1	PTHR22844:SF199 - F21J9.19	PF00400	WD domain, G-beta repeat	PTHR22844	F-BOX AND WD40 DOMAIN PROTEIN	KOG0645	WD40 repeat protein	EC 2.7.11.7	[Myosin heavy-chain] kinase.			GO:0005515
QTL_Mg_2_42540272			Phvul.002G252800	Chr02	42501489	42502366	1				PTHR37711
QTL_Mg_2_42540272			Phvul.002G252900	Chr02	42508948	42514399	1	K18584 - actin-related protein 3 (ACTR3, ARP3)	PF00022	Actin	PTHR11937	ACTIN					K18584	0	GO:0034314
QTL_Mg_2_42540272			Phvul.002G253000	Chr02	42517770	42518506	-1
QTL_Mg_2_42540272			Phvul.002G253100	Chr02	42520569	42524305	-1	PTHR22870:SF24 - GENOMIC DNA, CHROMOSOME 3, P1 CLONE: MPE11	PF00415	Regulator of chromosome condensation (RCC1) repeat	PTHR22870	REGULATOR OF CHROMOSOME CONDENSATION
QTL_Mg_2_42540272			Phvul.002G253200	Chr02	42529318	42533215	-1	PTHR22870:SF24 - GENOMIC DNA, CHROMOSOME 3, P1 CLONE: MPE11	PF00415	Regulator of chromosome condensation (RCC1) repeat	PTHR22870	REGULATOR OF CHROMOSOME CONDENSATION
QTL_Mg_2_42540272			Phvul.002G253300	Chr02	42541520	42541954	-1
QTL_Mg_2_42540272			Phvul.002G253400	Chr02	42548093	42550714	1	K10251 - 17beta-estradiol 17-dehydrogenase / very-long-chain 3-oxoacyl-CoA reductase (HSD17B12, KAR, IFA38)	PF13561	Enoyl-(Acyl carrier protein) reductase	PTHR24322	FAMILY NOT NAMED	KOG1014	17 beta-hydroxysteroid dehydrogenase type 3, HSD17B3	EC 1.1.1.330	Very-long-chain 3-oxoacyl-CoA reductase.	K10251	beta-keto reductase [EC:1.1.1.-]
QTL_Mg_2_42540272			Phvul.002G253500	Chr02	42552321	42553067	-1	PTHR10108:SF874 - F21J9.14	PF08241	Methyltransferase domain	PTHR10108	METHYLTRANSFERASE			EC 2.1.1.41	Sterol 24-C-methyltransferase.			GO:0008168
QTL_Mg_2_42540272			Phvul.002G253600	Chr02	42554761	42561944	-1	K18584 - actin-related protein 3 (ACTR3, ARP3)	PF00022	Actin	PTHR11937	ACTIN					K18584	0	GO:0034314
QTL_Mg_2_42540272			Phvul.002G253700	Chr02	42563438	42564677	-1	K02723 - photosystem II PsbY protein (psbY)	PF06298	Photosystem II protein Y (PsbY)	PTHR34790						K02723	photosystem II PsbY protein	GO:0030145
QTL_Mg_2_42540272			Phvul.002G253800	Chr02	42567768	42570466	1	PTHR11200//PTHR11200:SF106 - INOSITOL 5-PHOSPHATASE // SUBFAMILY NOT NAMED	PF03372	Endonuclease/Exonuclease/phosphatase family	PTHR11200	INOSITOL 5-PHOSPHATASE	KOG0565	Inositol polyphosphate 5-phosphatase and related proteins	EC 3.1.3.56	Inositol-polyphosphate 5-phosphatase.
QTL_Mg_2_42540272			Phvul.002G253900	Chr02	42570667	42572076	-1	PTHR33305:SF10 - ETHYLENE INSENSITIVE 3-LIKE 4 PROTEIN-RELATED	PF04873	Ethylene insensitive 3	PTHR33305						K14514	ethylene-insensitive protein 3
QTL_Mg_2_42540272			Phvul.002G254000	Chr02	42582534	42584135	-1	K02949 - small subunit ribosomal protein S11e (RP-S11e, RPS11)	PF00366	Ribosomal protein S17	PTHR10744	40S RIBOSOMAL PROTEIN S11 FAMILY MEMBER	KOG1728	40S ribosomal protein S11			K02949	small subunit ribosomal protein S11e	GO:0006412
QTL_Mg_2_42540272			Phvul.002G254100	Chr02	42601686	42606429	1	PF04782 - Protein of unknown function (DUF632) (DUF632)	PF04783	Protein of unknown function (DUF630)	PTHR21450	UNCHARACTERIZED
QTL_Mg_2_42540272			Phvul.002G254200	Chr02	42606853	42612861	-1	PTHR10909:SF317 - ACYL-COENZYME A OXIDASE 2, PEROXISOMAL	PF00441	Acyl-CoA dehydrogenase, C-terminal domain	PTHR10909	ELECTRON TRANSPORT OXIDOREDUCTASE			EC 1.3.3.6	Acyl-CoA oxidase.	K00232	acyl-CoA oxidase [EC:1.3.3.6]	GO:0055114
QTL_Mg_2_42540272			Phvul.002G254300	Chr02	42615193	42618824	-1	PTHR10909:SF317 - ACYL-COENZYME A OXIDASE 2, PEROXISOMAL	PF00441	Acyl-CoA dehydrogenase, C-terminal domain	PTHR10909	ELECTRON TRANSPORT OXIDOREDUCTASE			EC 1.3.3.6	Acyl-CoA oxidase.	K00232	acyl-CoA oxidase [EC:1.3.3.6]	GO:0055114
QTL_Mg_2_42540272			Phvul.002G254400	Chr02	42619981	42623376	1				PTHR33924
QTL_Mg_2_42540272			Phvul.002G254500	Chr02	42630642	42632490	1	PTHR31657:SF9 - ETHYLENE-RESPONSIVE TRANSCRIPTION FACTOR CRF5-RELATED	PF00847	AP2 domain	PTHR31657	FAMILY NOT NAMED					K09286	EREBP-like factor	GO:0006355
QTL_Mg_2_43486371			Phvul.002G261900	Chr02	43393379	43395327	1	PTHR31083:SF6 - PROTEIN UPSTREAM OF FLC	PF06136	Domain of unknown function (DUF966)	PTHR31083	FAMILY NOT NAMED
QTL_Mg_2_43486371			Phvul.002G262000	Chr02	43401621	43403139	-1	PTHR30231 - DNA POLYMERASE III SUBUNIT EPSILON	PF00929	Exonuclease	PTHR30231	DNA POLYMERASE III SUBUNIT EPSILON			EC 2.7.7.7	DNA-directed DNA polymerase.
QTL_Mg_2_43486371			Phvul.002G262100	Chr02	43404731	43408387	-1	2.6.1.78 - Aspartate--prephenate aminotransferase / Prephenate transaminase	PF01041	DegT/DnrJ/EryC1/StrS aminotransferase family	PTHR11751	SUBGROUP I AMINOTRANSFERASE RELATED	KOG0257	Kynurenine aminotransferase, glutamine transaminase K	EC 2.6.1.78	Aspartate--prephenate aminotransferase.	K15849	0
QTL_Mg_2_43486371			Phvul.002G262200	Chr02	43411259	43413772	1	1.10.3.2//1.10.3.3 - Laccase / Urishiol oxidase // L-ascorbate oxidase / Ascorbase	PF07731	Multicopper oxidase	PTHR11709	MULTI-COPPER OXIDASE	KOG1263	Multicopper oxidases	EC 1.10.3.2	Laccase.			GO:0055114
QTL_Mg_2_43486371			Phvul.002G262300	Chr02	43420829	43422256	-1				PTHR33985
QTL_Mg_2_43486371			Phvul.002G262400	Chr02	43422633	43424887	1		PF00254	FKBP-type peptidyl-prolyl cis-trans isomerase	PTHR10516	PEPTIDYL-PROLYL CIS-TRANS ISOMERASE	KOG0544	FKBP-type peptidyl-prolyl cis-trans isomerase	EC 5.2.1.8	Peptidylprolyl isomerase.			GO:0006457
QTL_Mg_2_43486371			Phvul.002G262500	Chr02	43427768	43428934	-1	PTHR22814//PTHR22814:SF126 - COPPER TRANSPORT PROTEIN ATOX1-RELATED // SUBFAMILY NOT NAMED	PF00403	Heavy-metal-associated domain	PTHR22814	COPPER TRANSPORT PROTEIN ATOX1-RELATED	KOG1603	Copper chaperone					GO:0046872
QTL_Mg_2_43486371			Phvul.002G262600	Chr02	43435093	43445955	-1	PTHR23315:SF66 - CELLULOSE SYNTHASE-INTERACTIVE PROTEIN 1	PF00168	C2 domain	PTHR23315	BETA CATENIN-RELATED ARMADILLO REPEAT-CONTAINING							GO:0005515
QTL_Mg_2_43486371			Phvul.002G262700	Chr02	43449888	43456553	-1	K17785 - mitofilin (IMMT, FCJ1, MNOS2)	PF09731	Mitochondrial inner membrane protein	PTHR15415	MITOFILIN					K17785	0
QTL_Mg_2_43486371			Phvul.002G262800	Chr02	43457258	43465710	1	K09140 - pre-rRNA-processing protein TSR3 (TSR3)	PF04068	Possible Fer4-like domain in RNase L inhibitor, RLI	PTHR20426	FAMILY NOT NAMED	KOG3154	Uncharacterized conserved protein			K09140	pre-rRNA-processing protein TSR3
QTL_Mg_2_43486371			Phvul.002G262900	Chr02	43467205	43472521	1	PTHR12460:SF4 - ENTH/VHS FAMILY PROTEIN	PF04818	RNA polymerase II-binding domain.	PTHR12460	CYCLIN-DEPENDENT KINASE INHIBITOR-RELATED PROTEIN	KOG2669	Regulator of nuclear mRNA			K15559	0
QTL_Mg_2_43486371	QTL_Cu_2_43570203		Phvul.002G263000	Chr02	43476540	43477186	1	K16282 - E3 ubiquitin-protein ligase RHA2 [EC:6.3.2.19] (RHA2)	PF13639	Ring finger domain	PTHR14155	RING FINGER DOMAIN-CONTAINING					K16282	0	GO:0008270
QTL_Mg_2_43486371	QTL_Cu_2_43570203		Phvul.002G263100	Chr02	43485353	43485872	-1				PTHR36067
QTL_Mg_2_43486371	QTL_Cu_2_43570203		Phvul.002G263200	Chr02	43487660	43491162	-1		PF12906	RING-variant domain	PTHR23012	MEMBRANE ASSOCIATED RING FINGER	KOG1609	Protein involved in mRNA turnover and stability	EC 6.3.2.19	Ubiquitin--protein ligase.			GO:0008270
QTL_Mg_2_43486371	QTL_Cu_2_43570203		Phvul.002G263300	Chr02	43491571	43495232	-1
QTL_Mg_2_43486371	QTL_Cu_2_43570203		Phvul.002G263400	Chr02	43509089	43516756	1	PTHR22952//PTHR22952:SF172 - CAMP-RESPONSE ELEMENT BINDING PROTEIN-RELATED // SUBFAMILY NOT NAMED	PF00170	bZIP transcription factor	PTHR22952	CAMP-RESPONSE ELEMENT BINDING PROTEIN-RELATED					K14431	transcription factor TGA	GO:0043565
QTL_Mg_2_43486371	QTL_Cu_2_43570203		Phvul.002G263500	Chr02	43517780	43521506	-1	PTHR11986:SF58 - ALANINE--GLYOXYLATE AMINOTRANSFERASE 2, MITOCHONDRIAL	PF00202	Aminotransferase class-III	PTHR11986	AMINOTRANSFERASE CLASS III			EC 2.6.1.44	Alanine--glyoxylate transaminase.	K00827	alanine-glyoxylate transaminase / (R)-3-amino-2-methylpropionate-pyruvate transaminase [EC:2.6.1.44 2.6.1.40]	GO:0030170
QTL_Mg_2_43486371	QTL_Cu_2_43570203		Phvul.002G263600	Chr02	43527410	43529911	-1	PF01535//PF13041//PF13812 - PPR repeat (PPR) // PPR repeat family (PPR_2) // Pentatricopeptide repeat domain (PPR_3) (1 of 46)	PF13812	Pentatricopeptide repeat domain	PTHR24015	FAMILY NOT NAMED
QTL_Mg_2_43486371	QTL_Cu_2_43570203		Phvul.002G263700	Chr02	43532992	43534968	-1	PF00067 - Cytochrome P450 (p450) (1 of 273)	PF00067	Cytochrome P450	PTHR24298	FAMILY NOT NAMED							GO:0055114
QTL_Mg_2_43486371	QTL_Cu_2_43570203		Phvul.002G263800	Chr02	43538648	43540658	1	1.14.13.109 - Abieta-7,13-dien-18-ol hydroxylase / CYP720B1	PF00067	Cytochrome P450	PTHR24298	FAMILY NOT NAMED	KOG0156	Cytochrome P450 CYP2 subfamily	EC 1.14.13.109	Abieta-7,13-dien-18-ol hydroxylase.			GO:0055114
QTL_Mg_2_43486371	QTL_Cu_2_43570203		Phvul.002G263900	Chr02	43543263	43545426	1	PF00067 - Cytochrome P450 (p450) (1 of 273)	PF00067	Cytochrome P450	PTHR24298	FAMILY NOT NAMED							GO:0055114
QTL_Mg_2_43486371	QTL_Cu_2_43570203		Phvul.002G264000	Chr02	43547252	43549406	-1	PF01535//PF13041 - PPR repeat (PPR) // PPR repeat family (PPR_2) (1 of 197)	PF01535	PPR repeat	PTHR24015	FAMILY NOT NAMED
QTL_Mg_2_43486371	QTL_Cu_2_43570203		Phvul.002G264100	Chr02	43551619	43552699	1
QTL_Mg_2_43486371	QTL_Cu_2_43570203		Phvul.002G264200	Chr02	43553358	43564776	-1	PTHR10566:SF74 - ABC TRANSPORTER-LIKE	PF03109	ABC1 family	PTHR10566	CHAPERONE-ACTIVITY OF BC1 COMPLEX (CABC1)-RELATED	KOG1235	Predicted unusual protein kinase	EC 3.6.3.46	Cadmium-transporting ATPase.
QTL_Mg_2_43486371	QTL_Cu_2_43570203		Phvul.002G264300	Chr02	43572801	43573859	1	PTHR11064//PTHR11064:SF45 - CCAAT-BINDING TRANSCRIPTION FACTOR-RELATED // SUBFAMILY NOT NAMED	PF00808	Histone-like transcription factor (CBF/NF-Y) and archaeal histone	PTHR11064	CCAAT-BINDING TRANSCRIPTION FACTOR-RELATED	KOG0869	CCAAT-binding factor, subunit A (HAP3)
QTL_Mg_2_43486371	QTL_Cu_2_43570203		Phvul.002G264400	Chr02	43577169	43583159	-1				PTHR33704
QTL_Mg_2_43486371	QTL_Cu_2_43570203		Phvul.002G264500	Chr02	43584278	43586387	-1				PTHR35771
	QTL_Cu_2_43570203		Phvul.002G264600	Chr02	43593152	43594342	1	PF00504 - Chlorophyll A-B binding protein (Chloroa_b-bind) (1 of 35)	PF00504	Chlorophyll A-B binding protein	PTHR36490
	QTL_Cu_2_43570203		Phvul.002G264700	Chr02	43594353	43597605	-1	PTHR33471:SF5 - EXPRESSED PROTEIN			PTHR33471
	QTL_Cu_2_43570203		Phvul.002G264800	Chr02	43598744	43604012	-1	2.7.1.71 - Shikimate kinase	PF13238	AAA domain	PTHR21087	SHIKIMATE KINASE			EC 2.7.1.71	Shikimate kinase.	K00891	shikimate kinase [EC:2.7.1.71]
	QTL_Cu_2_43570203		Phvul.002G264900	Chr02	43621981	43624529	1	PF01535//PF13041 - PPR repeat (PPR) // PPR repeat family (PPR_2) (1 of 197)	PF01535	PPR repeat	PTHR24015	FAMILY NOT NAMED
	QTL_Cu_2_43570203		Phvul.002G265000	Chr02	43625322	43626924	1	K02934 - large subunit ribosomal protein L6e (RP-L6e, RPL6)	PF03868	Ribosomal protein L6, N-terminal domain	PTHR10715	60S RIBOSOMAL PROTEIN L6	KOG1694	60s ribosomal protein L6			K02934	large subunit ribosomal protein L6e	GO:0006412
	QTL_Cu_2_43570203		Phvul.002G265100	Chr02	43628599	43631903	-1				PTHR33882
	QTL_Cu_2_43570203		Phvul.002G265200	Chr02	43634673	43635370	-1				PTHR35463
	QTL_Cu_2_43570203		Phvul.002G265300	Chr02	43636426	43641044	-1	K07933 - Rab-like protein 3 (RABL3)	PF00071	Ras family	PTHR24073	FAMILY NOT NAMED	KOG0394	Ras-related GTPase			K07933	Rab-like protein 3	GO:0007264
	QTL_Cu_2_43570203		Phvul.002G265400	Chr02	43645971	43647134	-1	PTHR31221:SF36 - WRKY TRANSCRIPTION FACTOR 50-RELATED	PF03106	WRKY DNA -binding domain	PTHR31221	FAMILY NOT NAMED							GO:0043565
	QTL_Cu_2_43570203		Phvul.002G265500	Chr02	43656873	43659349	1	PTHR24073:SF462 - RAS-RELATED PROTEIN RABG1-RELATED	PF00025	ADP-ribosylation factor family	PTHR24073	FAMILY NOT NAMED	KOG0394	Ras-related GTPase			K07897	Ras-related protein Rab-7A	GO:0005525
	QTL_Cu_2_43570203		Phvul.002G265600	Chr02	43661571	43667557	1	PTHR10072:SF48 - IRON-SULFUR ASSEMBLY PROTEIN ISCA, CHLOROPLASTIC	PF01521	Iron-sulphur cluster biosynthesis	PTHR10072	IRON-SULFUR CLUSTER ASSEMBLY PROTEIN	KOG1120	Fe-S cluster biosynthesis protein ISA1 (contains a HesB-like domain)			K13628	iron-sulfur cluster assembly protein
QTL_Mg_3_7168425			Phvul.003G054101	Chr03	7072158	7075841	1	PF09793 - Anticodon-binding domain (AD)	PF09793	Anticodon-binding domain	PTHR13542	UNCHARACTERIZED
QTL_Mg_3_7168425			Phvul.003G054200	Chr03	7075963	7077294	1	K00851 - gluconokinase (E2.7.1.12, gntK, idnK)	PF01202	Shikimate kinase	PTHR11603	AAA FAMILY ATPASE	KOG3354	Gluconate kinase			K00851	gluconokinase [EC:2.7.1.12]
QTL_Mg_3_7168425			Phvul.003G054300	Chr03	7085113	7086108	-1	PTHR32285:SF57 - PROTEIN ALTERED XYLOGLUCAN 4	PF14416	PMR5 N terminal Domain	PTHR32285	FAMILY NOT NAMED
QTL_Mg_3_7168425			Phvul.003G054400	Chr03	7093289	7102014	1	KOG4401 - Uncharacterized conserved protein	PF09793	Anticodon-binding domain	PTHR13542	UNCHARACTERIZED	KOG4401	Uncharacterized conserved protein
QTL_Mg_3_7168425			Phvul.003G054500	Chr03	7112469	7116646	1	PTHR11119:SF50 - NUCLEOBASE-ASCORBATE TRANSPORTER 7-RELATED	PF00860	Permease family	PTHR11119	XANTHINE-URACIL / VITAMIN C PERMEASE FAMILY MEMBER					K14611	0	GO:0055085
QTL_Mg_3_7168425			Phvul.003G054600	Chr03	7132118	7134134	1	K03248 - translation initiation factor 3 subunit G (EIF3G)	PF00076	RNA recognition motif. (a.k.a. RRM, RBD, or RNP domain)	PTHR10352	EUKARYOTIC TRANSLATION INITIATION FACTOR 3 SUBUNIT G	KOG0122	Translation initiation factor 3, subunit g (eIF-3g)			K03248	translation initiation factor eIF-3 subunit 4	GO:0003676
QTL_Mg_3_7168425			Phvul.003G054700	Chr03	7150784	7152593	1	PF14009 - Domain of unknown function (DUF4228) (DUF4228) (1 of 38)	PF14009	Domain of unknown function (DUF4228)	PTHR33413
QTL_Mg_3_7168425			Phvul.003G054800	Chr03	7152114	7156066	-1
QTL_Mg_3_7168425			Phvul.003G054801	Chr03	7176768	7181255	-1	PTHR10177:SF206 - CYCLIN-D1-1	PF02984	Cyclin, C-terminal domain	PTHR10177	CYCLINE	KOG0656	G1/S-specific cyclin D			K18810	0	GO:0005634
QTL_Mg_3_7168425			Phvul.003G055000	Chr03	7208624	7216120	1	PTHR33033:SF11 - RNASE H DOMAIN-CONTAINING PROTEIN	PF01693	Caulimovirus viroplasmin	PTHR33033				EC 3.1.26.4	Ribonuclease H.
QTL_Mg_3_7168425			Phvul.003G055100	Chr03	7217143	7219582	-1				PTHR35987
QTL_Mg_3_7168425			Phvul.003G055200	Chr03	7226235	7228378	-1	K12832 - splicing factor 3B subunit 5 (SF3B5, SF3B10)	PF07189	Splicing factor 3B subunit 10 (SF3b10)	PTHR20978	FAMILY NOT NAMED	KOG3485	Uncharacterized conserved protein			K12832	splicing factor 3B subunit 5
QTL_Mg_3_7168425			Phvul.003G055300	Chr03	7230577	7239158	-1		PF16656		PTHR22953	ACID PHOSPHATASE RELATED	KOG1378	Purple acid phosphatase	EC 3.1.4.1	Phosphodiesterase I.			GO:0016787
QTL_Mg_3_7168425			Phvul.003G055400	Chr03	7248231	7254187	1	PTHR24031:SF210 - DEAD-BOX ATP-DEPENDENT RNA HELICASE 22	PF00271	Helicase conserved C-terminal domain	PTHR24031	FAMILY NOT NAMED	KOG0333	U5 snRNP-like RNA helicase subunit	EC 3.6.4.13	RNA helicase.			GO:0005524
QTL_Mg_3_7168425			Phvul.003G055500	Chr03	7262449	7263366	-1	PTHR23201//PTHR23201:SF18 - EXTENSIN, PROLINE-RICH PROTEIN // SUBFAMILY NOT NAMED	PF02704	Gibberellin regulated protein	PTHR23201	EXTENSIN, PROLINE-RICH PROTEIN
QTL_Cu_3_8664946			Phvul.003G061800	Chr03	8572536	8582553	1	PTHR31675:SF8 - AXIAL REGULATOR YABBY 4	PF09011	HMG-box domain	PTHR31675	FAMILY NOT NAMED							GO:0007275
QTL_Cu_3_8664946			Phvul.003G061900	Chr03	8583121	8584272	-1	3.4.17.23 - Angiotensin-converting enzyme 2 / Angiotensin converting enzyme-2	PF09713	Plant protein 1589 of unknown function (A_thal_3526)	PTHR31871	FAMILY NOT NAMED			EC 3.4.17.23	Angiotensin-converting enzyme 2.
QTL_Cu_3_8664946			Phvul.003G062100	Chr03	8601645	8613225	1	PTHR31846:SF5 - CRS2-ASSOCIATED FACTOR 2, CHLOROPLASTIC	PF01985	CRS1 / YhbY (CRM) domain	PTHR31846	FAMILY NOT NAMED							GO:0003723
QTL_Cu_3_8664946			Phvul.003G062200	Chr03	8615020	8620986	1				PTHR12242	UNCHARACTERIZED
QTL_Cu_3_8664946			Phvul.003G062300	Chr03	8649876	8651601	-1	PF00646 - F-box domain (F-box) (1 of 135)	PF00646	F-box domain	PTHR24414	FAMILY NOT NAMED							GO:0005515
QTL_Cu_3_8664946			Phvul.003G062400	Chr03	8685803	8688778	1	PTHR32285:SF4 - PROTEIN TRICHOME BIREFRINGENCE-LIKE 2	PF14416	PMR5 N terminal Domain	PTHR32285	FAMILY NOT NAMED
QTL_Cu_3_8664946			Phvul.003G062500	Chr03	8739343	8750416	1	PTHR11850//PTHR11850:SF101 - HOMEOBOX PROTEIN TRANSCRIPTION FACTORS // SUBFAMILY NOT NAMED	PF03789	ELK domain	PTHR11850	HOMEOBOX PROTEIN TRANSCRIPTION FACTORS	KOG0773	Transcription factor MEIS1 and related HOX domain proteins					GO:0003677
QTL_Mn_3_11581681			Phvul.003G073400	Chr03	11486922	11488794	1	PF00046 - Homeobox domain (Homeobox) (1 of 84)	PF00046	Homeobox domain	PTHR24326	FAMILY NOT NAMED							GO:0003677
QTL_Mn_3_11581681			Phvul.003G073500	Chr03	11519748	11523471	1	PTHR24073:SF553 - RAS-RELATED PROTEIN RABA1G	PF00025	ADP-ribosylation factor family	PTHR24073	FAMILY NOT NAMED	KOG0087	GTPase Rab11/YPT3, small G protein superfamily			K07904	Ras-related protein Rab-11A	GO:0005525
QTL_Mn_3_11581681			Phvul.003G073600	Chr03	11557353	11559382	1	KOG3214 - Uncharacterized Zn ribbon-containing protein	PF05129	Transcription elongation factor Elf1 like	PTHR20934	UNCHARACTERIZED	KOG3214	Uncharacterized Zn ribbon-containing protein
QTL_Mn_3_11581681			Phvul.003G073700	Chr03	11572854	11578481	-1				PTHR33873
QTL_Mn_3_11581681			Phvul.003G073800	Chr03	11621539	11622260	1	K11253 - histone H3 (H3)	PF00125	Core histone H2A/H2B/H3/H4	PTHR11426	HISTONE H3	KOG1745	Histones H3 and H4			K11253	histone H3	GO:0003677
QTL_Mn_3_11581681			Phvul.003G073900	Chr03	11622506	11623686	-1	PTHR32227:SF122 - BETA-1,3-GLUCANASE-RELATED	PF00332	Glycosyl hydrolases family 17	PTHR32227	FAMILY NOT NAMED			EC 3.2.1.39	Glucan endo-1,3-beta-D-glucosidase.			GO:0005975
QTL_Mn_3_11581681			Phvul.003G074000	Chr03	11641754	11643653	-1	1.14.13.136 - 2-hydroxyisoflavanone synthase / Isoflavonoid synthase	PF00067	Cytochrome P450	PTHR24298	FAMILY NOT NAMED	KOG0156	Cytochrome P450 CYP2 subfamily	EC 1.14.13.136	2-hydroxyisoflavanone synthase.			GO:0055114
QTL_Mn_3_11581681			Phvul.003G074200	Chr03	11659073	11667172	-1		PF09768	Peptidase M76 family	PTHR21711	KUB3-PROV PROTEIN	KOG3314	Ku70-binding protein					GO:0004222
QTL_Mn_3_11581681			Phvul.003G074300	Chr03	11669276	11674898	-1	PTHR11200:SF133 - TYPE I INOSITOL 1,4,5-TRISPHOSPHATE 5-PHOSPHATASE 12-RELATED	PF03372	Endonuclease/Exonuclease/phosphatase family	PTHR11200	INOSITOL 5-PHOSPHATASE	KOG0565	Inositol polyphosphate 5-phosphatase and related proteins	EC 3.1.3.56	Inositol-polyphosphate 5-phosphatase.
QTL_Cu_3_26899343			Phvul.003G099800	Chr03	26818747	26819096	1				PTHR35726
QTL_Cu_3_26899343			Phvul.003G099900	Chr03	26905329	26908593	1	PF12796//PF13962 - Ankyrin repeats (3 copies) (Ank_2) // Domain of unknown function (PGG)	PF13962	Domain of unknown function	PTHR24177	FAMILY NOT NAMED	KOG4412	26S proteasome regulatory complex, subunit PSMD10
QTL_Cu_3_26899343	QTL_Cu_3_27006768		Phvul.003G100000	Chr03	26909883	26914392	-1		PF00226	DnaJ domain	PTHR24078	DNAJ HOMOLOG SUBFAMILY C MEMBER
QTL_Cu_3_26899343	QTL_Cu_3_27006768		Phvul.003G100100	Chr03	26950876	26952735	-1	PF01535//PF13041 - PPR repeat (PPR) // PPR repeat family (PPR_2) (1 of 197)	PF01535	PPR repeat	PTHR24015	FAMILY NOT NAMED
QTL_Cu_3_26899343	QTL_Cu_3_27006768		Phvul.003G100200	Chr03	26954244	26979033	-1		PF04851	Type III restriction enzyme, res subunit	PTHR10799	SWI/SNF-RELATED MATRIX-ASSOCIATED ACTIN-DEPENDENT REGULATOR OF CHROMATIN SUBFAMILY-RELATED			EC 3.6.4.12	DNA helicase.			GO:0016787
	QTL_Cu_3_27006768		Phvul.003G100300	Chr03	27013315	27014372	1
	QTL_Cu_3_27006768		Phvul.003G100400	Chr03	27031458	27032560	-1	PTHR20863:SF29 - ACYL CARRIER PROTEIN 1, CHLOROPLASTIC-RELATED	PF00550	Phosphopantetheine attachment site	PTHR20863	ACYL CARRIER PROTEIN/ZINC FINGER PROTEIN 593-RELATED	KOG1748	Acyl carrier protein/NADH-ubiquinone oxidoreductase, NDUFAB1/SDAP subunit
	QTL_Cu_3_27006768		Phvul.003G100500	Chr03	27051652	27055994	1	PTHR10809:SF59 - VESICLE-ASSOCIATED PROTEIN 2-2	PF00635	MSP (Major sperm protein) domain	PTHR10809	VESICLE-ASSOCIATED MEMBRANE PROTEIN-ASSOCIATED PROTEIN	KOG0439	VAMP-associated protein involved in inositol metabolism					GO:0005789
	QTL_Cu_3_27006768		Phvul.003G100600	Chr03	27057887	27061804	-1	PTHR10110:SF117 - SODIUM/HYDROGEN EXCHANGER 1-RELATED	PF00999	Sodium/hydrogen exchanger family	PTHR10110	SODIUM/HYDROGEN EXCHANGER							GO:0055085
QTL_Fe_3_31289008			Phvul.003G125300	Chr03	31217188	31221666	1	PTHR32468:SF20 - CATION/H(+) ANTIPORTER 19	PF00999	Sodium/hydrogen exchanger family	PTHR32468	FAMILY NOT NAMED							GO:0055085
QTL_Fe_3_31289008			Phvul.003G125400	Chr03	31241183	31244170	1	PTHR12668:SF5 - UPF0136 MEMBRANE PROTEIN YJR085C	PF03647	Transmembrane proteins 14C	PTHR12668	TRANSMEMBRANE PROTEIN 14, 15	KOG4267	Predicted membrane protein					GO:0016020
QTL_Fe_3_31289008			Phvul.003G125501	Chr03	31245800	31247567	1				PTHR36781
QTL_Fe_3_31289008			Phvul.003G125600	Chr03	31255025	31257817	1		PF13883	Pyridoxamine 5'-phosphate oxidase	PTHR13343	CREG1 PROTEIN	KOG3374	Cellular repressor of transcription
QTL_Fe_3_31289008			Phvul.003G125700	Chr03	31289825	31292864	-1	PTHR33077:SF5 - PROTEIN TIFY 3A-RELATED	PF06200	tify domain	PTHR33077						K13464	jasmonate ZIM domain-containing protein
QTL_Fe_3_31289008			Phvul.003G125800	Chr03	31333035	31342026	1	PTHR13856//PTHR13856:SF97 - VHS DOMAIN CONTAINING PROTEIN FAMILY // SUBFAMILY NOT NAMED	PF01363	FYVE zinc finger	PTHR13856	VHS DOMAIN CONTAINING PROTEIN FAMILY							GO:0046872
QTL_Fe_3_31289008			Phvul.003G125900	Chr03	31343288	31344165	1	PTHR14155 - RING FINGER DOMAIN-CONTAINING (1 of 159)	PF13639	Ring finger domain	PTHR14155	RING FINGER DOMAIN-CONTAINING							GO:0008270
QTL_Fe_3_31289008			Phvul.003G126000	Chr03	31357484	31372679	1	K13462 - guanine nucleotide-exchange factor (MIN7)	PF16206		PTHR10663	GUANYL-NUCLEOTIDE EXCHANGE FACTOR					K13462	guanine nucleotide-exchange factor	GO:0032012
QTL_Fe_3_31289008			Phvul.003G126100	Chr03	31374024	31376056	1	PTHR32227:SF59 - O-GLYCOSYL HYDROLASES FAMILY 17 PROTEIN	PF07983	X8 domain	PTHR32227	FAMILY NOT NAMED			EC 3.2.1.39	Glucan endo-1,3-beta-D-glucosidase.			GO:0005975
QTL_Mg_3_32599558			Phvul.003G130200	Chr03	32532787	32535510	1	PTHR32378:SF9 - KERATIN-ASSOCIATED PROTEIN 29-1	PF00631	GGL domain	PTHR32378	FAMILY NOT NAMED							GO:0007186
QTL_Mg_3_32599558			Phvul.003G130300	Chr03	32536338	32539289	-1	PTHR10795:SF434 - SUBTILISIN SERINE PROTEASE-RELATED	PF05922	Peptidase inhibitor I9	PTHR10795	PROPROTEIN CONVERTASE SUBTILISIN/KEXIN			EC 3.4.21.25	Cucumisin.			GO:0006508
QTL_Mg_3_32599558			Phvul.003G130400	Chr03	32583064	32585768	-1	2.7.11.1 - Non-specific serine/threonine protein kinase / Threonine-specific protein kinase (1 of 1198)	PF07714	Protein tyrosine kinase	PTHR27001		KOG1187	Serine/threonine protein kinase	EC 2.7.11.1	Non-specific serine/threonine protein kinase.			GO:0006468
QTL_Mg_3_32599558			Phvul.003G130550	Chr03	32622144	32632129	1	K01366 - cathepsin H (CTSH)	PF08246	Cathepsin propeptide inhibitor domain (I29)	PTHR12411	CYSTEINE PROTEASE FAMILY C1-RELATED	KOG1543	Cysteine proteinase Cathepsin L	EC 3.4.22.16	Cathepsin H.	K01366	cathepsin H [EC:3.4.22.16]	GO:0008234
QTL_Mg_3_32599558			Phvul.003G130700	Chr03	32642714	32645299	1				PTHR33172
QTL_Mg_3_32599558			Phvul.003G130800	Chr03	32653522	32654451	1				PTHR33527
QTL_Mg_3_32599558			Phvul.003G130900	Chr03	32666814	32669820	1	PTHR35710:SF1 - OBP3-RESPONSIVE PROTEIN 4			PTHR35710
QTL_Mg_3_32599558			Phvul.003G131000	Chr03	32670426	32671290	1	PTHR39113:SF1 - MEMBRANE LIPOPROTEIN-RELATED			PTHR39113
QTL_Mg_3_32599558			Phvul.003G131100	Chr03	32677434	32679525	1	PTHR23091:SF278 - ACYL-COA N-ACYLTRANSFERASES-LIKE PROTEIN	PF00583	Acetyltransferase (GNAT) family	PTHR23091	N-TERMINAL ACETYLTRANSFERASE			EC 2.3.1.88	Peptide alpha-N-acetyltransferase.			GO:0008080
QTL_Mg_3_32599558			Phvul.003G131200	Chr03	32683705	32687978	-1	K15082 - DNA repair protein RAD7 (RAD7)			PTHR24006	FAMILY NOT NAMED					K15082	0
QTL_Mn_3_37444587			Phvul.003G157200	Chr03	37347623	37352122	-1	1.2.1.9 - Glyceraldehyde-3-phosphate dehydrogenase (NADP(+)) / Triosephosphate dehydrogenase	PF00171	Aldehyde dehydrogenase family	PTHR11699	ALDEHYDE DEHYDROGENASE-RELATED			EC 1.2.1.9	Glyceraldehyde-3-phosphate dehydrogenase (NADP(+)).	K00131	glyceraldehyde-3-phosphate dehydrogenase (NADP) [EC:1.2.1.9]	GO:0055114
QTL_Mn_3_37444587			Phvul.003G157300	Chr03	37369276	37370643	1	PTHR12775 - PROTEIN C20ORF43 HOMOLOG	PF04641	Rtf2 RING-finger	PTHR12775	PROTEIN C20ORF43 HOMOLOG	KOG3113	Uncharacterized conserved protein
QTL_Mn_3_37444587			Phvul.003G157400	Chr03	37372419	37375205	-1		PF01416	tRNA pseudouridine synthase	PTHR11142	PSEUDOURIDYLATE SYNTHASE	KOG2553	Pseudouridylate synthase	EC 5.4.99.12	tRNA pseudouridine(38-40) synthase.			GO:0009982
QTL_Mn_3_37444587			Phvul.003G157500	Chr03	37378080	37381316	-1		PF13812	Pentatricopeptide repeat domain	PTHR24015	FAMILY NOT NAMED
QTL_Mn_3_37444587			Phvul.003G157600	Chr03	37388314	37398446	1	PF05182 - Fip1 motif (Fip1)	PF05182	Fip1 motif	PTHR36884
QTL_Mn_3_37444587			Phvul.003G157700	Chr03	37402518	37403376	1	PTHR15664 - C20ORF30 PROTEIN	PF05915	Eukaryotic protein of unknown function (DUF872)	PTHR15664	C20ORF30 PROTEIN	KOG4753	Predicted membrane protein
QTL_Mn_3_37444587			Phvul.003G157800	Chr03	37403436	37405196	-1	3.6.3.41 - Heme-transporting ATPase	PF00005	ABC transporter	PTHR24220	FAMILY NOT NAMED			EC 3.6.3.41	Heme-transporting ATPase.			GO:0016887
QTL_Mn_3_37444587			Phvul.003G157900	Chr03	37406657	37406857	1
QTL_Mn_3_37444587			Phvul.003G158000	Chr03	37414525	37418276	-1	PTHR23344:SF5 - GLYCEROPHOSPHODIESTER PHOSPHODIESTERASE LIKE 6-RELATED	PF03009	Glycerophosphoryl diester phosphodiesterase family	PTHR23344	GLYCEROPHOSPHORYL DIESTER PHOSPHODIESTERASE	KOG2258	Glycerophosphoryl diester phosphodiesterase	EC 3.1.4.46	Glycerophosphodiester phosphodiesterase.			GO:0008081
QTL_Mn_3_37444587			Phvul.003G158100	Chr03	37422521	37423855	-1	K03098 - apolipoprotein D and lipocalin family protein (APOD)	PF00061	Lipocalin / cytosolic fatty-acid binding protein family	PTHR10612	APOLIPOPROTEIN D	KOG4824	Apolipoprotein D/Lipocalin	EC 1.14.13.90	Zeaxanthin epoxidase.	K03098	outer membrane lipoprotein Blc
QTL_Mn_3_37444587			Phvul.003G158200	Chr03	37425086	37429190	-1	PTHR26402:SF423 - TWO-COMPONENT RESPONSE REGULATOR ARR10-RELATED	PF00072	Response regulator receiver domain	PTHR26402	RESPONSE REGULATOR OF TWO-COMPONENT SYSTEM	KOG1601	GATA-4/5/6 transcription factors			K14491	two-component response regulator ARR-B family	GO:0000160
QTL_Mn_3_37444587			Phvul.003G158300	Chr03	37444209	37447792	-1	PTHR12277:SF53 - ALPHA/BETA-HYDROLASES SUPERFAMILY PROTEIN	PF12695	Alpha/beta hydrolase family	PTHR12277	UNCHARACTERIZED	KOG1552	Predicted alpha/beta hydrolase
QTL_Mn_3_37444587			Phvul.003G158400	Chr03	37451264	37455800	-1	PTHR35769:SF2 - CALCINEURIN-LIKE METALLO-PHOSPHOESTERASE SUPERFAMILY PROTEIN	PF00149	Calcineurin-like phosphoesterase	PTHR35769								GO:0016787
QTL_Mn_3_37444587			Phvul.003G158500	Chr03	37464341	37465904	1	PTHR11177:SF219 - CHITINASE-LIKE PROTEIN-RELATED	PF00704	Glycosyl hydrolases family 18	PTHR11177	CHITINASE	KOG2806	Chitinase			K01183	chitinase [EC:3.2.1.14]	GO:0005975
QTL_Mn_3_37444587			Phvul.003G158600	Chr03	37474854	37485227	1	PF00704//PF07714 - Glycosyl hydrolases family 18 (Glyco_hydro_18) // Protein tyrosine kinase (Pkinase_Tyr)	PF07714	Protein tyrosine kinase	PTHR27002		KOG1187	Serine/threonine protein kinase	EC 2.7.11.1	Non-specific serine/threonine protein kinase.	K01183	chitinase [EC:3.2.1.14]	GO:0006468
QTL_Mn_3_37444587			Phvul.003G158700	Chr03	37486636	37489949	1	PF00704//PF07714 - Glycosyl hydrolases family 18 (Glyco_hydro_18) // Protein tyrosine kinase (Pkinase_Tyr)	PF07714	Protein tyrosine kinase	PTHR27002		KOG1187	Serine/threonine protein kinase	EC 2.7.11.1	Non-specific serine/threonine protein kinase.			GO:0006468
QTL_Mn_3_37444587			Phvul.003G158800	Chr03	37492778	37495197	1	PTHR11177//PTHR11177:SF208 - CHITINASE // SUBFAMILY NOT NAMED	PF00704	Glycosyl hydrolases family 18	PTHR11177	CHITINASE	KOG2806	Chitinase			K01183	chitinase [EC:3.2.1.14]	GO:0005975
QTL_Mn_3_37444587			Phvul.003G158900	Chr03	37499190	37505048	-1	K17824 - DCN1-like protein 4/5 (DCUN1D4_5)	PF03556	Cullin binding	PTHR12281	RP42 RELATED	KOG3077	Uncharacterized conserved protein			K17824	0
QTL_Mn_3_37444587			Phvul.003G159000	Chr03	37509583	37510734	1	PF08268 - F-box associated domain (FBA_3)	PF08268	F-box associated domain	PTHR32133	FAMILY NOT NAMED
QTL_Mn_3_37444587			Phvul.003G159100	Chr03	37513236	37514021	1	K02924 - large subunit ribosomal protein L39e (RP-L39e, RPL39)	PF00832	Ribosomal L39 protein	PTHR19970	RIBOSOMAL PROTEIN L39E	KOG0002	60s ribosomal protein L39			K02924	large subunit ribosomal protein L39e	GO:0006412
QTL_Mn_3_37444587			Phvul.003G159200	Chr03	37516916	37521492	1	PTHR24093:SF257 - ATPASE 6, PLASMA MEMBRANE-TYPE	PF00690	Cation transporter/ATPase, N-terminus	PTHR24093	FAMILY NOT NAMED			EC 3.6.3.6	Proton-exporting ATPase.	K01535	H+-transporting ATPase [EC:3.6.3.6]	GO:0046872
QTL_Ca_3_37988109			Phvul.003G160600	Chr03	37899154	37900201	1	PTHR22595//PTHR22595:SF47 - CHITINASE-RELATED // SUBFAMILY NOT NAMED	PF03330	Rare lipoprotein A (RlpA)-like double-psi beta-barrel	PTHR22595	CHITINASE-RELATED
QTL_Ca_3_37988109			Phvul.003G160700	Chr03	37908175	37917125	1		PF12906	RING-variant domain	PTHR23012	MEMBRANE ASSOCIATED RING FINGER	KOG1609	Protein involved in mRNA turnover and stability	EC 6.3.2.19	Ubiquitin--protein ligase.			GO:0008270
QTL_Ca_3_37988109	QTL_Ca_3_38019351		Phvul.003G160800	Chr03	37917646	37924375	-1	PF00027//PF07885//PF11834//PF12796//PF13857 - Cyclic nucleotide-binding domain (cNMP_binding) // Ion channel (Ion_trans_2) // KHA, dimerisation domain of potassium ion channel (KHA) // Ankyrin repeats (3 copies) (Ank_2) // Ankyrin repeats (many copies) (Ank_5)	PF07885	Ion channel	PTHR10217	VOLTAGE AND LIGAND GATED POTASSIUM CHANNEL
QTL_Ca_3_37988109	QTL_Ca_3_38019351		Phvul.003G160900	Chr03	37988558	37990064	1				PTHR34198
QTL_Ca_3_37988109	QTL_Ca_3_38019351	QTL_Ca_3_38092190	Phvul.003G161000	Chr03	37992712	37995427	-1				PTHR37713
QTL_Ca_3_37988109	QTL_Ca_3_38019351	QTL_Ca_3_38092190	Phvul.003G161100	Chr03	38000184	38002706	1	PTHR24071:SF7 - GTP-BINDING NUCLEAR PROTEIN RAN-2	PF00025	ADP-ribosylation factor family	PTHR24071	FAMILY NOT NAMED	KOG0096	GTPase Ran/TC4/GSP1 (nuclear protein transport pathway), small G protein superfamily	EC 4.2.1.17	Enoyl-CoA hydratase.	K07936	GTP-binding nuclear protein Ran	GO:0005525
QTL_Ca_3_37988109	QTL_Ca_3_38019351	QTL_Ca_3_38092190	Phvul.003G161200	Chr03	38025487	38028923	1	K15639 - PHYB activation tagged suppressor 1 (CYP734A1, BAS1)	PF00067	Cytochrome P450	PTHR24282	FAMILY NOT NAMED	KOG0157	Cytochrome P450 CYP4/CYP19/CYP26 subfamilies			K15639	0	GO:0055114
QTL_Ca_3_37988109	QTL_Ca_3_38019351	QTL_Ca_3_38092190	Phvul.003G161300	Chr03	38036773	38042467	-1		PF05641	Agenet domain	PTHR31917	FAMILY NOT NAMED
QTL_Ca_3_37988109	QTL_Ca_3_38019351	QTL_Ca_3_38092190	Phvul.003G161400	Chr03	38064804	38065037	-1				PTHR34189
QTL_Ca_3_37988109	QTL_Ca_3_38019351	QTL_Ca_3_38092190	Phvul.003G161500	Chr03	38073321	38075049	1	2.7.11.1 - Non-specific serine/threonine protein kinase / Threonine-specific protein kinase (1 of 1198)	PF00069	Protein kinase domain	PTHR27002		KOG1187	Serine/threonine protein kinase	EC 2.7.11.1	Non-specific serine/threonine protein kinase.			GO:0006468
QTL_Ca_3_37988109	QTL_Ca_3_38019351	QTL_Ca_3_38092190	Phvul.003G161600	Chr03	38080129	38084511	-1		PF05903	PPPDE putative peptidase domain	PTHR12378	UNCHARACTERIZED	KOG0324	Uncharacterized conserved protein
	QTL_Ca_3_38019351	QTL_Ca_3_38092190	Phvul.003G161700	Chr03	38089235	38090718	1				PTHR15852	FAMILY NOT NAMED
	QTL_Ca_3_38019351	QTL_Ca_3_38092190	Phvul.003G161800	Chr03	38094456	38098138	-1	K15133 - mediator of RNA polymerase II transcription subunit 17 (MED17)			PTHR13114	TRANSCRIPTIONAL CO-ACTIVATOR CRSP77-RELATED					K15133	0
	QTL_Ca_3_38019351	QTL_Ca_3_38092190	Phvul.003G161900	Chr03	38101111	38104552	-1				PTHR36888
	QTL_Ca_3_38019351	QTL_Ca_3_38092190	Phvul.003G162000	Chr03	38102604	38107031	1				PTHR15852	FAMILY NOT NAMED
		QTL_Ca_3_38092190	Phvul.003G162100	Chr03	38119149	38121225	1	PTHR24351:SF70 - PROTEIN KINASE PINOID 2	PF07714	Protein tyrosine kinase	PTHR24351	RIBOSOMAL PROTEIN S6 KINASE			EC 2.7.11.1	Non-specific serine/threonine protein kinase.			GO:0006468
		QTL_Ca_3_38092190	Phvul.003G162200	Chr03	38130510	38137758	1	PF03386 - Early nodulin 93 ENOD93 protein (ENOD93)	PF03386	Early nodulin 93 ENOD93 protein	PTHR33605
		QTL_Ca_3_38092190	Phvul.003G162150	Chr03	38130586	38131584	1	PF03386 - Early nodulin 93 ENOD93 protein (ENOD93)	PF03386	Early nodulin 93 ENOD93 protein	PTHR33605
		QTL_Ca_3_38092190	Phvul.003G162300	Chr03	38138051	38140252	-1	PF01535//PF12854//PF13041//PF14432 - PPR repeat (PPR) // PPR repeat (PPR_1) // PPR repeat family (PPR_2) // DYW family of nucleic acid deaminases (DYW_deaminase)	PF12854	PPR repeat	PTHR24015	FAMILY NOT NAMED
		QTL_Ca_3_38092190	Phvul.003G162400	Chr03	38151881	38153482	-1	PTHR23111//PTHR23111:SF41 - ZINC FINGER PROTEIN // SUBFAMILY NOT NAMED	PF00641	Zn-finger in Ran binding protein and others	PTHR23111	ZINC FINGER PROTEIN							GO:0008270
		QTL_Ca_3_38092190	Phvul.003G162500	Chr03	38160568	38162888	1	PTHR23111//PTHR23111:SF41 - ZINC FINGER PROTEIN // SUBFAMILY NOT NAMED	PF00641	Zn-finger in Ran binding protein and others	PTHR23111	ZINC FINGER PROTEIN							GO:0008270
		QTL_Ca_3_38092190	Phvul.003G162600	Chr03	38180169	38182817	1	PTHR12547:SF70 - ZINC FINGER CCCH DOMAIN-CONTAINING PROTEIN 39	PF00642	Zinc finger C-x8-C-x5-C-x3-H type (and similar)	PTHR12547	CCCH ZINC FINGER/TIS11-RELATED							GO:0046872
		QTL_Ca_3_38092190	Phvul.003G162700	Chr03	38187273	38191020	1	K03426 - NAD+ diphosphatase (E3.6.1.22, NUDT12, nudC)	PF09297	NADH pyrophosphatase zinc ribbon domain	PTHR22769	MUTT/NUDIX HYDROLASE	KOG3084	NADH pyrophosphatase I of the Nudix family of hydrolases	EC 3.6.1.22	NAD(+) diphosphatase.	K03426	NAD+ diphosphatase [EC:3.6.1.22]	GO:0046872
QTL_Cu_3_44944379			Phvul.003G220200	Chr03	44846898	44847768	1				PTHR38925
QTL_Cu_3_44944379			Phvul.003G220300	Chr03	44853975	44859024	1	K12863 - protein CWC15 (CWC15)	PF04889	Cwf15/Cwc15 cell cycle control protein	PTHR12718	CELL CYCLE CONTROL PROTEIN CWF15	KOG3228	Uncharacterized conserved protein			K12863	protein CWC15	GO:0005681
QTL_Cu_3_44944379			Phvul.003G220400	Chr03	44883741	44891021	1	2.4.1.186 - Glycogenin glucosyltransferase / Priming glucosyltransferase			PTHR11183	GLYCOGENIN			EC 2.4.1.186	Glycogenin glucosyltransferase.
QTL_Cu_3_44944379			Phvul.003G220500	Chr03	44898743	44903327	1	PTHR31321:SF19 - PECTINESTERASE 68-RELATED	PF01095	Pectinesterase	PTHR31321	FAMILY NOT NAMED			EC 3.1.1.11	Pectinesterase.			GO:0042545
QTL_Cu_3_44944379			Phvul.003G220550	Chr03	44903572	44906944	-1	PTHR12774 - PEROXISOMAL FARNESYLATED PROTEIN	PF04614	Pex19 protein family	PTHR12774	PEROXISOMAL FARNESYLATED PROTEIN							GO:0005777
QTL_Cu_3_44944379			Phvul.003G220600	Chr03	44919999	44923984	-1	K13337 - peroxin-19 (PEX19)	PF04614	Pex19 protein family	PTHR12774	PEROXISOMAL FARNESYLATED PROTEIN	KOG3133	40 kDa farnesylated protein associated with peroxisomes			K13337	peroxin-19	GO:0005777
QTL_Cu_3_44944379			Phvul.003G220700	Chr03	44925684	44933362	1	PTHR22594:SF6 - ASPARAGINE--TRNA LIGASE, MITOCHONDRIAL	PF00152	tRNA synthetases class II (D, K and N)	PTHR22594	ASPARTYL/LYSYL-TRNA SYNTHETASE			EC 6.1.1.22	Asparagine--tRNA ligase.	K01893	asparaginyl-tRNA synthetase [EC:6.1.1.22]	GO:0006418
QTL_Cu_3_44944379			Phvul.003G220800	Chr03	44934922	44935904	-1	K02983 - small subunit ribosomal protein S30e (RP-S30e, RPS30)	PF04758	Ribosomal protein S30	PTHR12650	40S RIBOSOMAL PROTEIN S30/UBIQUITIN-LIKE PROTEIN FUBI	KOG0009	Ubiquitin-like/40S ribosomal S30 protein fusion			K02983	small subunit ribosomal protein S30e	GO:0006412
QTL_Cu_3_44944379			Phvul.003G220900	Chr03	44938764	44947937	-1		PF12932	Vesicle coat trafficking protein Sec16 mid-region	PTHR13402	RGPR-RELATED	KOG1913	Regucalcin gene promoter region-related protein (RGPR)					GO:0048208
QTL_Cu_3_44944379			Phvul.003G221000	Chr03	44958664	44959509	-1	PF13912 - C2H2-type zinc finger (zf-C2H2_6) (1 of 42)	PF13912	C2H2-type zinc finger	PTHR26374	FAMILY NOT NAMED
QTL_Cu_3_44944379			Phvul.003G221100	Chr03	44966907	44970049	-1	PF00892 - EamA-like transporter family (EamA) (1 of 74)	PF00892	EamA-like transporter family	PTHR31218	FAMILY NOT NAMED							GO:0016021
QTL_Cu_3_44944379			Phvul.003G221200	Chr03	44974387	44977132	-1				PTHR33156
QTL_Cu_3_44944379			Phvul.003G221250	Chr03	44992323	45003516	1	PTHR31942:SF18 - MLO-LIKE PROTEIN 10-RELATED	PF03094	Mlo family	PTHR31942	FAMILY NOT NAMED							GO:0016021
QTL_Cu_3_44944379			Phvul.003G221225	Chr03	44992323	44994447	1
QTL_Cu_3_44944379			Phvul.003G221275	Chr03	45000506	45000929	1	PTHR15439 - RETINOBLASTOMA-BINDING PROTEIN 6			PTHR15439	RETINOBLASTOMA-BINDING PROTEIN 6
QTL_Cu_3_44944379			Phvul.003G221300	Chr03	45029332	45043299	1	PTHR31917:SF7 - G2484-1 PROTEIN	PF05641	Agenet domain	PTHR31917	FAMILY NOT NAMED
QTL_Mn_3_45208418			Phvul.003G222200	Chr03	45119707	45126332	-1		PF01987	Mitochondrial biogenesis AIM24	PTHR31801	FAMILY NOT NAMED
QTL_Mn_3_45208418			Phvul.003G222300	Chr03	45129510	45134042	1	PTHR11062:SF59 - EXOSTOSIN FAMILY PROTEIN	PF03016	Exostosin family	PTHR11062	EXOSTOSIN (HEPARAN SULFATE GLYCOSYLTRANSFERASE)-RELATED	KOG1021	Acetylglucosaminyltransferase EXT1/exostosin 1	EC 2.4.2.41	Xylogalacturonan beta-1,3-xylosyltransferase.
QTL_Mn_3_45208418			Phvul.003G222400	Chr03	45136431	45137978	-1	PTHR10641//PTHR10641:SF558 - MYB-LIKE DNA-BINDING PROTEIN MYB // SUBFAMILY NOT NAMED	PF00249	Myb-like DNA-binding domain	PTHR10641	MYB-LIKE DNA-BINDING PROTEIN MYB					K09422	myb proto-oncogene protein, plant
QTL_Mn_3_45208418			Phvul.003G222500	Chr03	45157566	45164616	-1	3.1.4.12 - Sphingomyelin phosphodiesterase / Neutral sphingomyelinase	PF14724	Mitochondrial-associated sphingomyelin phosphodiesterase	PTHR31801	FAMILY NOT NAMED			EC 3.1.4.12	Sphingomyelin phosphodiesterase.			GO:0050290
QTL_Mn_3_45208418			Phvul.003G222600	Chr03	45193643	45194335	-1	PTHR31985:SF11 - ETHYLENE-RESPONSIVE TRANSCRIPTION FACTOR ERF035	PF00847	AP2 domain	PTHR31985	FAMILY NOT NAMED							GO:0006355
QTL_Mn_3_45208418			Phvul.003G222800	Chr03	45216522	45229633	-1		PF02770	Acyl-CoA dehydrogenase, middle domain	PTHR10909	ELECTRON TRANSPORT OXIDOREDUCTASE			EC 1.3.3.6	Acyl-CoA oxidase.	K00232	acyl-CoA oxidase [EC:1.3.3.6]	GO:0055114
QTL_Mn_3_45208418			Phvul.003G222900	Chr03	45232359	45238229	-1	PTHR24078:SF280 - MYB TRANSCRIPTION FACTOR	PF00249	Myb-like DNA-binding domain	PTHR24078	DNAJ HOMOLOG SUBFAMILY C MEMBER
QTL_Mn_3_45208418			Phvul.003G223000	Chr03	45266928	45269240	-1		PF07797	Protein of unknown function (DUF1639)	PTHR33130
QTL_Mn_3_45208418			Phvul.003G223100	Chr03	45277144	45282157	1	PTHR10209//PTHR10209:SF214 - OXIDOREDUCTASE, 2OG-FE II OXYGENASE FAMILY PROTEIN // SUBFAMILY NOT NAMED	PF03171	2OG-Fe(II) oxygenase superfamily	PTHR10209	OXIDOREDUCTASE, 2OG-FE(II) OXYGENASE FAMILY PROTEIN	KOG0143	Iron/ascorbate family oxidoreductases	EC 1.14.17.4	Aminocyclopropanecarboxylate oxidase.			GO:0055114
QTL_Mn_3_45208418			Phvul.003G223200	Chr03	45306353	45308163	1	PTHR24326:SF140 - HOMEOBOX-LEUCINE ZIPPER PROTEIN HAT1-RELATED	PF02183	Homeobox associated leucine zipper	PTHR24326	FAMILY NOT NAMED	KOG0483	Transcription factor HEX, contains HOX and HALZ domains			K09338	homeobox-leucine zipper protein	GO:0043565
QTL_Mo_4_19580353			Phvul.004G081788	Chr04	19492398	19495210	-1
QTL_Mo_4_19580353			Phvul.004G081500	Chr04	19505996	19507894	-1	K02635 - cytochrome b6 (petB)			PTHR19271	CYTOCHROME B					K02635	cytochrome b6
QTL_Mo_4_19580353			Phvul.004G081694	Chr04	19558019	19560811	-1
QTL_Mo_4_19580353			Phvul.004G081888	Chr04	19669596	19670423	-1	PTHR10797//PTHR10797:SF10 - CCR4-NOT TRANSCRIPTION COMPLEX SUBUNIT // SUBFAMILY NOT NAMED	PF04857	CAF1 family ribonuclease	PTHR10797	CCR4-NOT TRANSCRIPTION COMPLEX SUBUNIT	KOG0304	mRNA deadenylase subunit	EC 3.1.13.4	Poly(A)-specific ribonuclease.			GO:0005634
QTL_Ca_4_24279020			Phvul.004G089300	Chr04	24249596	24260859	1		PF03372	Endonuclease/Exonuclease/phosphatase family	PTHR11200	INOSITOL 5-PHOSPHATASE	KOG0565	Inositol polyphosphate 5-phosphatase and related proteins	EC 3.1.3.56	Inositol-polyphosphate 5-phosphatase.
QTL_Ca_4_24279020			Phvul.004G089400	Chr04	24257987	24259413	-1
QTL_Ca_4_24279020			Phvul.004G089200	Chr04	24278965	24296274	1	K11168 - dehydrogenase/reductase SDR family member 12 (DHRS12)	PF00106	short chain dehydrogenase	PTHR24320	FAMILY NOT NAMED	KOG1208	Dehydrogenases with different specificities (related to short-chain alcohol dehydrogenases)	EC 1.1.1.300	NADP-retinol dehydrogenase.	K11168	dehydrogenase/reductase SDR family member 12 [EC:1.1.-.-]	GO:0016491
QTL_Ca_4_24279020			Phvul.004G089000	Chr04	24297644	24303622	-1	2.7.1.32 - Choline kinase	PF01636	Phosphotransferase enzyme family	PTHR22603	CHOLINE/ETHANOALAMINE KINASE	KOG2686	Choline kinase	EC 2.7.1.82	Ethanolamine kinase.	K14156	choline/ethanolamine kinase [EC:2.7.1.32 2.7.1.82]
QTL_Mg_4_30632382			Phvul.004G099200	Chr04	30713562	30713936	1	PF04576 - Zein-binding (Zein-binding)	PF04576	Zein-binding	0
QTL_Mg_4_30632382			Phvul.004G099250	Chr04	30729495	30730377	-1
QTL_Mo_4_31371712			Phvul.004G105501	Chr04	31450019	31456746	1	3.2.1.15 - Polygalacturonase / Pectinase (1 of 57)	PF00560	Leucine Rich Repeat	PTHR27004				EC 3.2.1.15	Polygalacturonase.			GO:0005515
QTL_Ca_4_40294366			Phvul.004G117200	Chr04	40199975	40201126	1	PF00646 - F-box domain (F-box) (1 of 135)	PF00646	F-box domain	PTHR32212	FAMILY NOT NAMED							GO:0005515
QTL_Ca_4_40294366			Phvul.004G117300	Chr04	40283382	40287229	-1	PTHR11081:SF17 - FLAP ENDONUCLEASE GEN-LIKE 2			PTHR11081	XP-G/RAD2 DNA REPAIR ENDONUCLEASE FAMILY							GO:0006281
QTL_Ca_4_40294366			Phvul.004G117350	Chr04	40322150	40327233	1
QTL_Ca_4_40294366			Phvul.004G117400	Chr04	40378488	40383786	-1	K15338 - flap endonuclease GEN [EC:3.1.-.-] (GEN1, GEN)	PF00752	XPG N-terminal domain	PTHR11081	XP-G/RAD2 DNA REPAIR ENDONUCLEASE FAMILY	KOG2519	5'-3' exonuclease	EC 3.1.16.1	Spleen exonuclease.	K15338	0	GO:0006281
QTL_Ca_5_825380			Phvul.005G008400	Chr05	739318	742827	-1	PTHR31585:SF12 - FOLATE-BIOPTERIN TRANSPORTER 8, CHLOROPLASTIC-RELATED	PF07690	Major Facilitator Superfamily	PTHR31585	FAMILY NOT NAMED							GO:0055085
QTL_Ca_5_825380			Phvul.005G008600	Chr05	752808	755843	1	PTHR31807:SF10 - QWRF MOTIF-CONTAINING PROTEIN 7	PF04484	Family of unknown function (DUF566)	PTHR31807	FAMILY NOT NAMED
QTL_Ca_5_825380			Phvul.005G008700	Chr05	756453	759647	-1	PTHR15907:SF35 - GENE1000 PROTEIN-RELATED	PF04749	PLAC8 family	PTHR15907	FAMILY NOT NAMED
QTL_Ca_5_825380			Phvul.005G009000	Chr05	780073	792511	-1		PF00781	Diacylglycerol kinase catalytic domain	PTHR12358	SPHINGOSINE KINASE	KOG1115	Ceramide kinase	EC 2.7.1.138	Ceramide kinase.			GO:0016301
QTL_Ca_5_825380			Phvul.005G009100	Chr05	795492	798592	1	K17080 - prohibitin 1 (PHB1)	PF01145	SPFH domain / Band 7 family	PTHR23222	PROHIBITIN	KOG3083	Prohibitin			K17080	0	GO:0016020
QTL_Ca_5_825380			Phvul.005G009601	Chr05	831431	836038	1	PTHR10366//PTHR10366:SF352 - NAD DEPENDENT EPIMERASE/DEHYDRATASE // SUBFAMILY NOT NAMED	PF01370	NAD dependent epimerase/dehydratase family	PTHR10366	NAD DEPENDENT EPIMERASE/DEHYDRATASE							GO:0050662
QTL_Ca_5_825380			Phvul.005G009800	Chr05	845377	849239	-1	PTHR10366//PTHR10366:SF352 - NAD DEPENDENT EPIMERASE/DEHYDRATASE // SUBFAMILY NOT NAMED	PF05368	NmrA-like family	PTHR10366	NAD DEPENDENT EPIMERASE/DEHYDRATASE
QTL_Ca_5_825380			Phvul.005G009900	Chr05	862795	865103	1		PF09759	Spinocerebellar ataxia type 10 protein domain	PTHR13255	ATAXIN-10
QTL_Ca_5_825380			Phvul.005G010000	Chr05	869498	873991	1	PTHR10366//PTHR10366:SF352 - NAD DEPENDENT EPIMERASE/DEHYDRATASE // SUBFAMILY NOT NAMED	PF05368	NmrA-like family	PTHR10366	NAD DEPENDENT EPIMERASE/DEHYDRATASE
QTL_Ca_5_825380			Phvul.005G010100	Chr05	879743	886828	1		PF13639	Ring finger domain	PTHR22763	RING ZINC FINGER PROTEIN	KOG0802	E3 ubiquitin ligase			K19323	0	GO:0008270
QTL_Ca_5_825380			Phvul.005G010400	Chr05	903632	911755	-1		PF14569	Zinc-binding RING-finger	PTHR13301	X-BOX TRANSCRIPTION FACTOR-RELATED			EC 2.4.1.12	Cellulose synthase (UDP-forming).	K10999	cellulose synthase A [EC:2.4.1.12]	GO:0030244
QTL_Ca_5_825380			Phvul.005G010500	Chr05	913192	918742	1	2.3.1.47 - 8-amino-7-oxononanoate synthase / AONS	PF00155	Aminotransferase class I and II	PTHR13693	CLASS II AMINOTRANSFERASE/8-AMINO-7-OXONONANOATE SYNTHASE	KOG1359	Glycine C-acetyltransferase/2-amino-3-ketobutyrate-CoA ligase	EC 2.3.1.47	8-amino-7-oxononanoate synthase.	K00652	8-amino-7-oxononanoate synthase [EC:2.3.1.47]	GO:0030170
QTL_Mo_5_16746387			Phvul.005G076000	Chr05	16656104	16656623	1				PTHR31704	FAMILY NOT NAMED
QTL_Mo_5_16746387			Phvul.005G078101	Chr05	16682106	16693118	1	PTHR10361:SF28 - SODIUM/BILE ACID COTRANSPORTER 4	PF01758	Sodium Bile acid symporter family	PTHR10361	SODIUM-BILE ACID COTRANSPORTER					K03453	bile acid:Na+ symporter, BASS family	GO:0016020
QTL_Mo_5_16746387			Phvul.005G075700	Chr05	16714886	16719912	1	PF06314 - Acetoacetate decarboxylase (ADC) (ADC)	PF06314	Acetoacetate decarboxylase (ADC)	PTHR35467								GO:0016829
QTL_Mo_5_16746387	QTL_Mo_5_16870681		Phvul.005G075600	Chr05	16799380	16807933	1	KOG0845 - Nuclear pore complex, Nup98 component (sc Nup145/Nup100/Nup116)	PF04096	Nucleoporin autopeptidase	PTHR23198	NUCLEOPORIN	KOG0845	Nuclear pore complex, Nup98 component (sc Nup145/Nup100/Nup116)			K14297	nuclear pore complex protein Nup98-Nup96	GO:0006810
QTL_Mg_5_17263012			Phvul.005G080400	Chr05	17210656	17212107	1	PF03106 - WRKY DNA -binding domain (WRKY) (1 of 91)	PF03106	WRKY DNA -binding domain	PTHR31282	FAMILY NOT NAMED							GO:0043565
QTL_Mg_5_17263012			Phvul.005G080500	Chr05	17250916	17251796	1
QTL_Mg_5_20353152			Phvul.005G080900	Chr05	20433764	20438452	1	PTHR13609 - UBIQUITIN DOMAIN CONTAINING 1 PROTEIN-RELATED	PF16455		PTHR13609	UBIQUITIN DOMAIN CONTAINING 1 PROTEIN-RELATED
QTL_Cu_5_29919387			Phvul.005G095600	Chr05	29821918	29827753	1	2.7.1.26 - Riboflavin kinase / RFK	PF13419	Haloacid dehalogenase-like hydrolase	PTHR22749	RIBOFLAVIN KINASE/FMN ADENYLYLTRANSFERASE	KOG2914	Predicted haloacid-halidohydrolase and related hydrolases	EC 2.7.1.26	Riboflavin kinase.
QTL_Cu_5_29919387			Phvul.005G095700	Chr05	29884232	29884642	1	PF04398 - Protein of unknown function, DUF538 (DUF538)	PF04398	Protein of unknown function, DUF538	PTHR31676	FAMILY NOT NAMED
QTL_Cu_5_29919387			Phvul.005G095800	Chr05	29902801	29906224	-1		PF00085	Thioredoxin	PTHR22904	TPR REPEAT CONTAINING PROTEIN	KOG0550	Molecular chaperone (DnaJ superfamily)					GO:0045454
QTL_Cu_5_29919387			Phvul.005G095900	Chr05	29932041	29935930	-1		PF01450	Acetohydroxy acid isomeroreductase, catalytic domain	PTHR21371	FAMILY NOT NAMED			EC 1.1.1.86	Ketol-acid reductoisomerase.	K00053	ketol-acid reductoisomerase [EC:1.1.1.86]	GO:0055114
QTL_Cu_5_29919387			Phvul.005G096000	Chr05	29947104	29951131	1	PTHR12847:SF4 - ADAPTIN EAR-BINDING COAT-ASSOCIATED PROTEIN 1 NECAP-1	PF07933	Protein of unknown function (DUF1681)	PTHR12847	ATP-BINDING CASSETTE (ABC) TRANSPORTER-RELATED	KOG2500	Uncharacterized conserved protein					GO:0016020
QTL_Cu_5_29919387			Phvul.005G096100	Chr05	29951871	29955593	1				PTHR34659
QTL_Cu_5_29919387			Phvul.005G096200	Chr05	29978263	29981965	1	PTHR32285:SF71 - PROTEIN TRICHOME BIREFRINGENCE-LIKE 39-RELATED	PF14416	PMR5 N terminal Domain	PTHR32285	FAMILY NOT NAMED
QTL_Cu_5_29919387			Phvul.005G096300	Chr05	29991439	29993674	1	PTHR23241:SF49 - COLD-REGULATED PROTEIN 15B			PTHR23241	LATE EMBRYOGENESIS ABUNDANT (PLANTS) LEA-RELATED	KOG4744	Uncharacterized conserved protein
QTL_Cu_5_29919387			Phvul.005G096400	Chr05	29993953	29995878	-1				PTHR33927
QTL_Cu_5_29919387			Phvul.005G096500	Chr05	30005067	30006094	-1				PTHR33834
QTL_Cu_5_29919387			Phvul.005G096600	Chr05	30006774	30010280	-1	PTHR21496//PTHR21496:SF8 - FERREDOXIN-RELATED // SUBFAMILY NOT NAMED	PF04305	Protein of unknown function (DUF455)	PTHR21496	FERREDOXIN-RELATED
QTL_Cu_5_29919387			Phvul.005G096700	Chr05	30012289	30015394	-1		PF00439	Bromodomain	PTHR22880	FALZ-RELATED BROMODOMAIN-CONTAINING PROTEINS	KOG1474	Transcription initiation factor TFIID, subunit BDF1 and related bromodomain proteins					GO:0005515
QTL_Cu_6_4804173			Phvul.006G017500	Chr06	4804136	4806473	-1	PTHR11926:SF233 - UDP-GLYCOSYLTRANSFERASE 85A1-RELATED	PF00201	UDP-glucoronosyl and UDP-glucosyl transferase	PTHR11926	GLUCOSYL/GLUCURONOSYL TRANSFERASES			EC 2.4.1.324	0			GO:0016758
QTL_Cu_6_7107934			Phvul.006G015300	Chr06	7024910	7028768	1	PTHR24349:SF131 - CALCIUM-DEPENDENT PROTEIN KINASE 17-RELATED	PF13499	EF-hand domain pair	PTHR24349	SERINE/THREONINE-PROTEIN KINASE	KOG0032	Ca2+/calmodulin-dependent protein kinase, EF-Hand protein superfamily	EC 2.7.11.1	Non-specific serine/threonine protein kinase.	K13412	calcium-dependent protein kinase [EC:2.7.11.1]	GO:0006468
QTL_Cu_6_7107934			Phvul.006G015400	Chr06	7047400	7050191	-1	K13083 - flavonoid 3',5'-hydroxylase (CYP75A)	PF00067	Cytochrome P450	PTHR24298	FAMILY NOT NAMED	KOG0156	Cytochrome P450 CYP2 subfamily	EC 1.14.13.88	Flavonoid 3',5'-hydroxylase.	K13083	cytochrome P450, family 75, subfamily A (flavonoid 3',5'-hydroxylase) [EC:1.14.13.88]	GO:0055114
QTL_Cu_6_7107934			Phvul.006G015500	Chr06	7063408	7070151	-1	PTHR10887//PTHR10887:SF372 - DNA2/NAM7 HELICASE FAMILY // SUBFAMILY NOT NAMED	PF00580	UvrD/REP helicase N-terminal domain	PTHR10887	DNA2/NAM7 HELICASE FAMILY	KOG1801	tRNA-splicing endonuclease positive effector (SEN1)			K10706	senataxin [EC:3.6.4.-]	GO:0005524
QTL_Cu_6_7107934			Phvul.006G015600	Chr06	7089263	7103862	1	PTHR33882:SF3 - RPM1-INTERACTING PROTEIN 4 (RIN4) FAMILY PROTEIN			PTHR33882
QTL_Cu_6_7107934			Phvul.006G015700	Chr06	7139760	7141215	1	PTHR10015//PTHR10015:SF177 - HEAT SHOCK TRANSCRIPTION FACTOR // SUBFAMILY NOT NAMED	PF00447	HSF-type DNA-binding	PTHR10015	HEAT SHOCK TRANSCRIPTION FACTOR					K09419	heat shock transcription factor, other eukaryote	GO:0043565
QTL_Mo_6_10916435			Phvul.006G028601	Chr06	10866889	10872564	1	K17839 - polyamine oxidase (PAO4, PAO3, PAO2)	PF13450	NAD(P)-binding Rossmann-like domain	PTHR10742	AMINE OXIDASE	KOG0029	Amine oxidase	EC 1.5.3.17	Non-specific polyamine oxidase.	K17839	0
QTL_Mo_6_10916435			Phvul.006G028701	Chr06	10873033	10876474	-1	PTHR11206:SF85 - PROTEIN TRANSPARENT TESTA 12	PF01554	MatE	PTHR11206	MULTIDRUG RESISTANCE PROTEIN	KOG1347	Uncharacterized membrane protein, predicted efflux pump			K03327	multidrug resistance protein, MATE family	GO:0055085
QTL_Mo_6_10916435			Phvul.006G028800	Chr06	10893909	10900175	1	PTHR31339:SF3 - GLYCOSIDE HYDROLASE FAMILY 28 PROTEIN / POLYGALACTURONASE (PECTINASE) FAMILY PROTEIN	PF12708	Pectate lyase superfamily protein	PTHR31339	FAMILY NOT NAMED
QTL_Mo_6_10916435			Phvul.006G028850	Chr06	10937143	10940980	1
QTL_Mo_6_10916435			Phvul.006G028900	Chr06	10943941	10950871	-1	PTHR24031//PTHR24031:SF296 - RNA HELICASE // SUBFAMILY NOT NAMED	PF00271	Helicase conserved C-terminal domain	PTHR24031	FAMILY NOT NAMED	KOG0331	ATP-dependent RNA helicase	EC 3.6.4.13	RNA helicase.	K16911	0	GO:0005524
QTL_Mo_6_10916435			Phvul.006G029000	Chr06	10997594	11002161	1	PTHR27000:SF121 - LEUCINE-RICH REPEAT RECEPTOR-LIKE SERINE/THREONINE-PROTEIN KINASE BAM3	PF08263	Leucine rich repeat N-terminal domain	PTHR27000		KOG1187	Serine/threonine protein kinase	EC 2.7.11.1	Non-specific serine/threonine protein kinase.			GO:0005515
QTL_Mg_6_12382652			Phvul.006G032000	Chr06	12282746	12283436	1
QTL_Mg_6_12382652			Phvul.006G032100	Chr06	12326523	12361037	1	PTHR12741:SF16 - CALLOSE SYNTHASE 7-RELATED	PF04652	Vta1 like	PTHR12741	LYST-INTERACTING PROTEIN LIP5 (DOPAMINE RESPONSIVE PROTEIN DRG-1)			EC 2.4.1.34	1,3-beta-glucan synthase.	K11000	callose synthase [EC:2.4.1.-]	GO:0016020
QTL_Mg_6_12382652			Phvul.006G032200	Chr06	12370323	12375367	1				PTHR32002	FAMILY NOT NAMED
QTL_Mg_6_12382652			Phvul.006G032300	Chr06	12411635	12416366	1	PTHR27001:SF221 - PROTEIN KINASE FAMILY PROTEIN	PF00069	Protein kinase domain	PTHR27001		KOG1187	Serine/threonine protein kinase	EC 2.7.11.1	Non-specific serine/threonine protein kinase.			GO:0006468
QTL_Mg_6_12382652			Phvul.006G032400	Chr06	12418928	12420193	-1	PTHR13068:SF28 - MITOCHONDRIAL TRANSCRIPTION TERMINATION FACTOR FAMILY PROTEIN-RELATED	PF02536	mTERF	PTHR13068	CGI-12 PROTEIN-RELATED	KOG1267	Mitochondrial transcription termination factor, mTERF			K15032	0	GO:0006355
QTL_Mg_6_12382652			Phvul.006G032500	Chr06	12424418	12427824	-1
QTL_Mg_6_12382652			Phvul.006G032600	Chr06	12426422	12427410	-1	PTHR13068:SF28 - MITOCHONDRIAL TRANSCRIPTION TERMINATION FACTOR FAMILY PROTEIN-RELATED	PF02536	mTERF	PTHR13068	CGI-12 PROTEIN-RELATED					K15032	0	GO:0006355
QTL_Mg_6_12382652			Phvul.006G032700	Chr06	12434452	12444858	1	PTHR12758:SF20 - PEPTIDASE-C1 DOMAIN-CONTAINING PROTEIN	PF06972	Protein of unknown function (DUF1296)	PTHR12758	APOPTOSIS INHIBITOR 5-RELATED
QTL_Mg_6_12382652			Phvul.006G032800	Chr06	12454308	12457726	1	PTHR32227:SF127 - CARBOHYDRATE-BINDING X8 DOMAIN-CONTAINING PROTEIN	PF07983	X8 domain	PTHR32227	FAMILY NOT NAMED			EC 3.2.1.39	Glucan endo-1,3-beta-D-glucosidase.
QTL_Cu_6_23404896			Phvul.006G125100	Chr06	23305284	23309648	1	PTHR22762:SF82 - PROTEIN AAGR-1	PF13802	Galactose mutarotase-like	PTHR22762	ALPHA-GLUCOSIDASE			EC 3.2.1.20	Alpha-glucosidase.	K01187	alpha-glucosidase [EC:3.2.1.20]	GO:0005975
QTL_Cu_6_23404896			Phvul.006G125200	Chr06	23314096	23323766	1	PTHR12049:SF5 - NADH DEHYDROGENASE [UBIQUINONE] COMPLEX I, ASSEMBLY FACTOR 7 HOMOLOG	PF02636	Putative S-adenosyl-L-methionine-dependent methyltransferase	PTHR12049	UNCHARACTERIZED
QTL_Cu_6_23404896			Phvul.006G125300	Chr06	23325317	23328174	-1		PF13947	Wall-associated receptor kinase galacturonan-binding	PTHR27005		KOG1187	Serine/threonine protein kinase	EC 2.7.11.1	Non-specific serine/threonine protein kinase.			GO:0030247
QTL_Cu_6_23404896			Phvul.006G125400	Chr06	23337391	23339103	1	PTHR32448:SF34 - F22M8.11 PROTEIN-RELATED	PF08031	Berberine and berberine like	PTHR32448	FAMILY NOT NAMED			EC 1.3.3.8	Tetrahydroberberine oxidase.			GO:0055114
QTL_Cu_6_23404896			Phvul.006G125500	Chr06	23342256	23344172	1	PTHR32448:SF34 - F22M8.11 PROTEIN-RELATED	PF08031	Berberine and berberine like	PTHR32448	FAMILY NOT NAMED			EC 1.3.3.8	Tetrahydroberberine oxidase.			GO:0055114
QTL_Cu_6_23404896			Phvul.006G125600	Chr06	23344611	23346227	-1	PTHR32448:SF34 - F22M8.11 PROTEIN-RELATED	PF08031	Berberine and berberine like	PTHR32448	FAMILY NOT NAMED	KOG1231	Proteins containing the FAD binding domain	EC 1.3.3.8	Tetrahydroberberine oxidase.			GO:0055114
QTL_Cu_6_23404896			Phvul.006G125700	Chr06	23350230	23352117	-1	PTHR32448:SF34 - F22M8.11 PROTEIN-RELATED	PF08031	Berberine and berberine like	PTHR32448	FAMILY NOT NAMED			EC 1.3.3.8	Tetrahydroberberine oxidase.			GO:0055114
QTL_Cu_6_23404896			Phvul.006G125800	Chr06	23361489	23363407	1	PTHR32448:SF11 - BERBERINE BRIDGE ENZYME-RELATED	PF08031	Berberine and berberine like	PTHR32448	FAMILY NOT NAMED			EC 1.3.3.8	Tetrahydroberberine oxidase.			GO:0055114
QTL_Cu_6_23404896			Phvul.006G125900	Chr06	23365024	23371494	-1	PTHR12863 - FATTY ACID HYDROXYLASE	PF04116	Fatty acid hydroxylase superfamily	PTHR12863	FATTY ACID HYDROXYLASE	KOG0539	Sphingolipid fatty acid hydroxylase					GO:0055114
QTL_Cu_6_23404896			Phvul.006G126000	Chr06	23379764	23380897	-1	PTHR36381:SF1 - ETHYLENE-REGULATED NUCLEAR PROTEIN ERT2-LIKE PROTEIN-RELATED			PTHR36381
QTL_Cu_6_23404896			Phvul.006G126100	Chr06	23400806	23403448	1	PTHR11588:SF97 - TUBULIN BETA-4 CHAIN-RELATED	PF03953	Tubulin C-terminal domain	PTHR11588	TUBULIN			EC 2.4.2.1	Purine-nucleoside phosphorylase.	K07375	tubulin beta	GO:0003924
QTL_Cu_6_23404896			Phvul.006G126200	Chr06	23405393	23406400	1	PF07883 - Cupin domain (Cupin_2)	PF07883	Cupin domain	PTHR31238	FAMILY NOT NAMED
QTL_Cu_6_23404896			Phvul.006G126300	Chr06	23408979	23409539	-1	PTHR31656:SF0 - LATE EMBRYOGENESIS ABUNDANT PROTEIN-LIKE PROTEIN	PF06830	Root cap	PTHR31656	FAMILY NOT NAMED
QTL_Cu_6_23404896			Phvul.006G126400	Chr06	23410077	23411003	-1	2.4.1.10 - Levansucrase / Sucrose 6-fructosyltransferase			PTHR31656	FAMILY NOT NAMED			EC 2.4.1.10	Levansucrase.
QTL_Cu_6_23404896			Phvul.006G126500	Chr06	23415296	23420723	-1	PTHR24326:SF282 - HOMEOBOX-LEUCINE ZIPPER PROTEIN HDG11	PF00046	Homeobox domain	PTHR24326	FAMILY NOT NAMED	KOG0484	Transcription factor PHOX2/ARIX, contains HOX domain			K09338	homeobox-leucine zipper protein	GO:0003677
QTL_Cu_6_23404896			Phvul.006G126600	Chr06	23443933	23448379	-1	PTHR24326:SF282 - HOMEOBOX-LEUCINE ZIPPER PROTEIN HDG11	PF00046	Homeobox domain	PTHR24326	FAMILY NOT NAMED					K09338	homeobox-leucine zipper protein	GO:0003677
QTL_Cu_6_23404896			Phvul.006G126700	Chr06	23452038	23461186	1				PTHR37735
QTL_Cu_6_23404896			Phvul.006G126800	Chr06	23461910	23465515	1	PF01535//PF13041//PF13812 - PPR repeat (PPR) // PPR repeat family (PPR_2) // Pentatricopeptide repeat domain (PPR_3) (1 of 46)	PF13812	Pentatricopeptide repeat domain	PTHR24015	FAMILY NOT NAMED
QTL_Cu_6_23404896			Phvul.006G126900	Chr06	23467023	23472014	-1	1.1.1.23 - Histidinol dehydrogenase	PF00815	Histidinol dehydrogenase	PTHR21256	HISTIDINOL DEHYDROGENASE (HDH)			EC 1.1.1.23	Histidinol dehydrogenase.	K00013	histidinol dehydrogenase [EC:1.1.1.23]	GO:0055114
QTL_Cu_6_23404896			Phvul.006G127000	Chr06	23473366	23476320	-1		PF00515	Tetratricopeptide repeat	PTHR36326								GO:0005515
QTL_Cu_6_23404896			Phvul.006G127100	Chr06	23483135	23495889	1		PF04851	Type III restriction enzyme, res subunit	PTHR14950	HELICASE-RELATED	KOG0701	dsRNA-specific nuclease Dicer and related ribonucleases	EC 3.1.26.3	Ribonuclease III.	K11592	endoribonuclease Dicer [EC:3.1.26.-]	GO:0016787
QTL_Mg_6_26644872			Phvul.006G162200	Chr06	26551147	26562387	1	K11654 - SWI/SNF-related matrix-associated actin-dependent regulator of chromatin subfamily A member 5 [EC:3.6.4.-] (SMARCA5, SNF2H, ISWI)	PF13892	DNA-binding domain	PTHR10799	SWI/SNF-RELATED MATRIX-ASSOCIATED ACTIN-DEPENDENT REGULATOR OF CHROMATIN SUBFAMILY-RELATED			EC 2.7.11.17	Calcium/calmodulin-dependent protein kinase.	K11654	SWI/SNF-related matrix-associated actin-dependent regulator of chromatin subfamily A member 5 [EC:3.6.4.-]	GO:0016817
QTL_Mg_6_26644872			Phvul.006G162400	Chr06	26563378	26570068	-1	PTHR27001:SF100 - PROTEIN KINASE FAMILY PROTEIN	PF00069	Protein kinase domain	PTHR27001		KOG1187	Serine/threonine protein kinase	EC 2.7.11.1	Non-specific serine/threonine protein kinase.			GO:0006468
QTL_Mg_6_26644872			Phvul.006G162500	Chr06	26578675	26585314	1		PF13812	Pentatricopeptide repeat domain	PTHR24015	FAMILY NOT NAMED
QTL_Mg_6_26644872			Phvul.006G162600	Chr06	26589405	26589983	-1	PTHR10168:SF105 - MONOTHIOL GLUTAREDOXIN-S10	PF00462	Glutaredoxin	PTHR10168	GLUTAREDOXIN	KOG1752	Glutaredoxin and related proteins	EC 1.8.1.9	Thioredoxin-disulfide reductase.	K03676	glutaredoxin 3	GO:0045454
QTL_Mg_6_26644872			Phvul.006G162700	Chr06	26599217	26599885	1	PTHR10168:SF115 - MONOTHIOL GLUTAREDOXIN-S2-RELATED	PF00462	Glutaredoxin	PTHR10168	GLUTAREDOXIN	KOG1752	Glutaredoxin and related proteins	EC 1.8.1.9	Thioredoxin-disulfide reductase.	K03676	glutaredoxin 3	GO:0045454
QTL_Mg_6_26644872			Phvul.006G162800	Chr06	26604084	26611606	1	PTHR23244:SF308 - KELCH REPEAT-CONTAINING PROTEIN	PF01344	Kelch motif	PTHR23244	KELCH REPEAT DOMAIN	KOG0379	Kelch repeat-containing proteins					GO:0005515
QTL_Mg_6_26644872			Phvul.006G162900	Chr06	26612474	26619834	-1	PTHR12558:SF8 - ANAPHASE-PROMOTING COMPLEX SUBUNIT 7	PF13176	Tetratricopeptide repeat	PTHR12558	CELL DIVISION CYCLE 16,23,27	KOG1174	Anaphase-promoting complex (APC), subunit 7			K03354	anaphase-promoting complex subunit 7	GO:0005515
QTL_Mg_6_26644872			Phvul.006G163000	Chr06	26621058	26625429	1		PF09269	Domain of unknown function (DUF1967)	PTHR11702	DEVELOPMENTALLY REGULATED GTP-BINDING PROTEIN-RELATED	KOG1489	Predicted GTP-binding protein (ODN superfamily)					GO:0000166
QTL_Mg_6_26644872			Phvul.006G163100	Chr06	26630637	26631587	1	PF00847 - AP2 domain (AP2) (1 of 180)	PF00847	AP2 domain	PTHR31677	FAMILY NOT NAMED							GO:0006355
QTL_Mg_6_26644872			Phvul.006G163200	Chr06	26633749	26634755	1
QTL_Mg_6_26644872			Phvul.006G163300	Chr06	26634344	26644212	-1	PTHR12506:SF27 - ZINC FINGER CCCH DOMAIN-CONTAINING PROTEIN 34-RELATED	PF00642	Zinc finger C-x8-C-x5-C-x3-H type (and similar)	PTHR12506	PROTEIN PHOSPHATASE RELATED	KOG1677	CCCH-type Zn-finger protein					GO:0046872
QTL_Mg_6_26644872			Phvul.006G163400	Chr06	26652008	26654235	-1	K02882 - large subunit ribosomal protein L18Ae (RP-L18Ae, RPL18A)	PF01775	Ribosomal L18ae/LX protein domain	PTHR10052	60S RIBOSOMAL PROTEIN L18A	KOG0829	60S ribosomal protein L18A			K02882	large subunit ribosomal protein L18Ae	GO:0006412
QTL_Mg_6_26644872			Phvul.006G163500	Chr06	26655927	26657883	1	K02955 - small subunit ribosomal protein S14e (RP-S14e, RPS14)	PF00411	Ribosomal protein S11	PTHR11759	40S RIBOSOMAL PROTEIN S14/30S RIBOSOMAL PROTEIN S11	KOG0407	40S ribosomal protein S14			K02955	small subunit ribosomal protein S14e	GO:0006412
QTL_Mg_6_26644872			Phvul.006G163600	Chr06	26659536	26661485	-1	K02955 - small subunit ribosomal protein S14e (RP-S14e, RPS14)	PF00411	Ribosomal protein S11	PTHR11759	40S RIBOSOMAL PROTEIN S14/30S RIBOSOMAL PROTEIN S11	KOG0407	40S ribosomal protein S14			K02955	small subunit ribosomal protein S14e	GO:0006412
QTL_Mg_6_26644872			Phvul.006G163700	Chr06	26662418	26667409	1	PTHR10052//PTHR10052:SF9 - 60S RIBOSOMAL PROTEIN L18A // SUBFAMILY NOT NAMED			PTHR10052	60S RIBOSOMAL PROTEIN L18A
QTL_Mg_6_26644872			Phvul.006G163800	Chr06	26684719	26686970	1	K09832 - cytochrome P450, family 710, subfamily A (CYP710A)	PF00067	Cytochrome P450	PTHR24286	FAMILY NOT NAMED	KOG0157	Cytochrome P450 CYP4/CYP19/CYP26 subfamilies			K09832	cytochrome P450, family 710, subfamily A	GO:0055114
QTL_Mg_6_26644872			Phvul.006G163900	Chr06	26692683	26701920	-1	2.7.8.13 - Phospho-N-acetylmuramoyl-pentapeptide-transferase / UDP-MurNAc-pentapeptide phosphotransferase	PF00953	Glycosyl transferase family 4	PTHR22926	PHOSPHO-N-ACETYLMURAMOYL-PENTAPEPTIDE-TRANSFERASE			EC 2.7.8.13	Phospho-N-acetylmuramoyl-pentapeptide-transferase.	K01000	phospho-N-acetylmuramoyl-pentapeptide-transferase [EC:2.7.8.13]	GO:0016021
QTL_Mg_6_26644872			Phvul.006G164000	Chr06	26704001	26708769	-1	PTHR22792:SF58 - LA-RELATED PROTEIN 6A	PF00076	RNA recognition motif. (a.k.a. RRM, RBD, or RNP domain)	PTHR22792	LUPUS LA PROTEIN-RELATED	KOG1855	Predicted RNA-binding protein			K15191	0	GO:0003676
QTL_Mg_6_26644872			Phvul.006G164100	Chr06	26710278	26715042	-1	PF04862 - Protein of unknown function (DUF642) (DUF642)	PF04862	Protein of unknown function (DUF642)	PTHR31265	FAMILY NOT NAMED
QTL_Mg_6_26644872			Phvul.006G164200	Chr06	26717778	26719484	-1	KOG0254 - Predicted transporter (major facilitator superfamily) (1 of 73)	PF07690	Major Facilitator Superfamily	PTHR23500		KOG0254	Predicted transporter (major facilitator superfamily)					GO:0055085
QTL_Mg_6_26644872			Phvul.006G164300	Chr06	26739466	26743148	1	PTHR10217//PTHR10217:SF520 - VOLTAGE AND LIGAND GATED POTASSIUM CHANNEL // SUBFAMILY NOT NAMED	PF00027	Cyclic nucleotide-binding domain	PTHR10217	VOLTAGE AND LIGAND GATED POTASSIUM CHANNEL	KOG0500	Cyclic nucleotide-gated cation channel CNGA1-3 and related proteins
QTL_Mg_7_20643908			Phvul.007G111800	Chr07	20554778	20562520	-1		PF01937	Protein of unknown function DUF89	PTHR12280	PANTOTHENATE KINASE	KOG4584	Uncharacterized conserved protein
QTL_Mg_7_20643908			Phvul.007G111700	Chr07	20568097	20568540	1				PTHR36595
QTL_Mg_7_20643908			Phvul.007G111600	Chr07	20569441	20576763	-1	PTHR31500:SF18 - AT HOOK MOTIF DNA-BINDING FAMILY PROTEIN-RELATED	PF03479	Domain of unknown function (DUF296)	PTHR31500	FAMILY NOT NAMED
QTL_Mg_7_20643908			Phvul.007G111500	Chr07	20601188	20606206	-1	PTHR19321:SF7 - 65-KDA MICROTUBULE-ASSOCIATED PROTEIN 3-RELATED	PF03999	Microtubule associated protein (MAP65/ASE1 family)	PTHR19321	PROTEIN REGULATOR OF CYTOKINESIS 1 PRC1-RELATED					K16732	0	GO:0008017
QTL_Mg_7_20643908			Phvul.007G111400	Chr07	20620048	20625448	-1	PTHR32285:SF18 - PROTEIN YLS7-RELATED	PF14416	PMR5 N terminal Domain	PTHR32285	FAMILY NOT NAMED
QTL_Mg_7_20643908			Phvul.007G111300	Chr07	20653722	20655161	1	PTHR31371:SF4 - SIMILARITY TO UNKNOWN PROTEIN	PF11961	Domain of unknown function (DUF3475)	PTHR31371	FAMILY NOT NAMED
QTL_Mg_7_20643908			Phvul.007G111200	Chr07	20693634	20695218	-1	PTHR23050 - CALCIUM BINDING PROTEIN	PF13499	EF-hand domain pair	PTHR23050	CALCIUM BINDING PROTEIN	KOG0027	Calmodulin and related proteins (EF-Hand superfamily)			K13448	calcium-binding protein CML
QTL_Mg_7_20643908			Phvul.007G111100	Chr07	20732188	20735192	1	K07950 - ADP-ribosylation factor-like protein 5B (ARL5B)	PF08477	Miro-like protein	PTHR11711	ADP RIBOSYLATION FACTOR-RELATED	KOG0070	GTP-binding ADP-ribosylation factor Arf1			K07950	ADP-ribosylation factor-like 5B	GO:0007264
QTL_Ca_7_24798685			Phvul.007G149000	Chr07	24708218	24712159	1	PTHR31384:SF27 - AUXIN RESPONSE FACTOR 10-RELATED	PF02362	B3 DNA binding domain	PTHR31384	FAMILY NOT NAMED							GO:0003677
QTL_Ca_7_24798685			Phvul.007G149100	Chr07	24723813	24725325	1	PTHR12321:SF31 - PROTEIN TAF-8, ISOFORM B	PF07524	Bromodomain associated	PTHR12321	CPG BINDING PROTEIN	KOG2389	Predicted bromodomain transcription factor			K14649	transcription initiation factor TFIID subunit 8
QTL_Ca_7_24798685			Phvul.007G149200	Chr07	24726294	24731363	1
QTL_Ca_7_24798685			Phvul.007G149300	Chr07	24734652	24741700	-1	PF10270 - Membrane magnesium transporter (MMgT)	PF10270	Membrane magnesium transporter	PTHR21181	FAMILY NOT NAMED
QTL_Ca_7_24798685			Phvul.007G149366	Chr07	24754526	24758857	1	K13525 - transitional endoplasmic reticulum ATPase (VCP, CDC48)	PF07724	AAA domain (Cdc48 subfamily)	PTHR23077	AAA-FAMILY ATPASE			EC 3.6.4.6	Vesicle-fusing ATPase.	K13525	transitional endoplasmic reticulum ATPase	GO:0005524
QTL_Ca_7_24798685			Phvul.007G149432	Chr07	24805995	24810123	1	K13525 - transitional endoplasmic reticulum ATPase (VCP, CDC48)	PF07724	AAA domain (Cdc48 subfamily)	PTHR23077	AAA-FAMILY ATPASE			EC 3.6.4.6	Vesicle-fusing ATPase.	K13525	transitional endoplasmic reticulum ATPase	GO:0005524
QTL_Ca_7_24798685			Phvul.007G149500	Chr07	24821538	24822002	1	PF00240 - Ubiquitin family (ubiquitin) (1 of 44)	PF00240	Ubiquitin family	0								GO:0005515
QTL_Ca_7_24798685			Phvul.007G149600	Chr07	24824908	24830377	-1	PTHR30603:SF9 - RNA POLYMERASE SIGMA FACTOR SIGF, CHLOROPLASTIC	PF04542	Sigma-70 region 2	PTHR30603	RNA POLYMERASE SIGMA FACTOR RPO							GO:0016987
QTL_Ca_7_24798685			Phvul.007G149700	Chr07	24862841	24863661	1	PTHR31072:SF7 - TRANSCRIPTION FACTOR TCP21-RELATED	PF03634	TCP family transcription factor	PTHR31072	FAMILY NOT NAMED
QTL_Ca_7_24798685			Phvul.007G149800	Chr07	24870654	24875564	-1	PTHR12419//PTHR12419:SF19 - OTU DOMAIN CONTAINING PROTEIN // SUBFAMILY NOT NAMED	PF02338	OTU-like cysteine protease	PTHR12419	OTU DOMAIN CONTAINING PROTEIN	KOG2605	OTU (ovarian tumor)-like cysteine protease	EC 3.4.19.12	Ubiquitinyl hydrolase 1.
QTL_Ca_7_24798685			Phvul.007G149900	Chr07	24878987	24883082	-1	2.7.11.1 - Non-specific serine/threonine protein kinase / Threonine-specific protein kinase (1 of 1198)	PF07714	Protein tyrosine kinase	PTHR27001		KOG1187	Serine/threonine protein kinase	EC 2.7.11.1	Non-specific serine/threonine protein kinase.			GO:0006468
QTL_Ca_7_24798685			Phvul.007G150000	Chr07	24884311	24895282	1	PTHR19241:SF252 - WHITE-BROWN COMPLEX HOMOLOG PROTEIN 30-RELATED	PF00005	ABC transporter	PTHR19241	ATP-BINDING CASSETTE TRANSPORTER	KOG0061	Transporter, ABC superfamily (Breast cancer resistance protein)	EC 3.6.3.25	Sulfate-transporting ATPase.			GO:0016887
QTL_Fe_7_25770068			Phvul.007G151800	Chr07	25671485	25673968	1	PTHR24136:SF15 - PROTEIN SWAH-1	PF12796	Ankyrin repeats (3 copies)	PTHR24136	FAMILY NOT NAMED
QTL_Fe_7_25770068			Phvul.007G151900	Chr07	25686360	25689920	-1	PTHR24073:SF536 - RAS-RELATED PROTEIN RABC2A	PF00025	ADP-ribosylation factor family	PTHR24073	FAMILY NOT NAMED	KOG0080	GTPase Rab18, small G protein superfamily	EC 3.6.5.2	Small monomeric GTPase.	K07910	Ras-related protein Rab-18	GO:0005525
QTL_Fe_7_25770068			Phvul.007G152000	Chr07	25705474	25720905	-1		PF02493	MORN repeat	PTHR23086	PHOSPHATIDYLINOSITOL-4-PHOSPHATE 5-KINASE			EC 2.7.1.68	1-phosphatidylinositol-4-phosphate 5-kinase.			GO:0046488
QTL_Fe_7_25770068			Phvul.007G152100	Chr07	25736174	25744787	1		PF01648	4'-phosphopantetheinyl transferase superfamily	PTHR12215	PHOSPHOPANTETHEINE TRANSFERASE	KOG0945	Alpha-aminoadipic semialdehyde dehydrogenase-phosphopantetheinyl transferase	EC 2.7.8.7	Holo-[acyl-carrier-protein] synthase.	K06133	4'-phosphopantetheinyl transferase [EC:2.7.8.-]	GO:0008897
QTL_Fe_7_25770068			Phvul.007G152200	Chr07	25739745	25741040	-1
QTL_Fe_7_25770068			Phvul.007G152300	Chr07	25745595	25750385	-1	PTHR20852:SF16 - TYPE-1 GLUTAMINE SYNTHETASE 1	PF04909	Amidohydrolase	PTHR20852	GLUTAMINE SYNTHETASE							GO:0016787
QTL_Fe_7_25770068			Phvul.007G152400	Chr07	25759027	25764382	-1	K12847 - U4/U6.U5 tri-snRNP-associated protein 2 (USP39, SAD1)	PF13423	Ubiquitin carboxyl-terminal hydrolase	PTHR24006	FAMILY NOT NAMED			EC 3.4.19.12	Ubiquitinyl hydrolase 1.	K12847	U4/U6.U5 tri-snRNP-associated protein 2	GO:0008270
QTL_Fe_7_25770068			Phvul.007G152500	Chr07	25766202	25776404	-1	KOG0683 - Glutamine synthetase	PF04909	Amidohydrolase	PTHR20852	GLUTAMINE SYNTHETASE	KOG0683	Glutamine synthetase	EC 6.3.1.2	Glutamate--ammonia ligase.			GO:0016787
QTL_Fe_7_25770068			Phvul.007G152600	Chr07	25800710	25804799	-1	PTHR18952:SF100 - ALPHA CARBONIC ANHYDRASE 5	PF00194	Eukaryotic-type carbonic anhydrase	PTHR18952	CARBONIC ANHYDRASE	KOG0382	Carbonic anhydrase	EC 4.2.1.1	Carbonate dehydratase.	K01674	carbonic anhydrase [EC:4.2.1.1]
QTL_Fe_7_25770068			Phvul.007G152700	Chr07	25821756	25822875	1	2.7.11.17 - Calcium/calmodulin-dependent protein kinase / Microtubule-associated protein 2 kinase			PTHR34120				EC 2.7.11.17	Calcium/calmodulin-dependent protein kinase.
QTL_Fe_7_25770068			Phvul.007G152800	Chr07	25837445	25839378	-1	K13496 - UDP-glucosyl transferase 73C [EC:2.4.1.-] Glc - brassinosteroid (UGT73C)	PF00201	UDP-glucoronosyl and UDP-glucosyl transferase	PTHR11926	GLUCOSYL/GLUCURONOSYL TRANSFERASES	KOG1192	UDP-glucuronosyl and UDP-glucosyl transferase	EC 2.4.1.203	Trans-zeatin O-beta-D-glucosyltransferase.	K13496	UDP-glucosyl transferase 73C [EC:2.4.1.-]	GO:0016758
QTL_Fe_7_27864996			Phvul.007G164700	Chr07	27766153	27769440	1				PTHR33476
QTL_Fe_7_27864996			Phvul.007G164800	Chr07	27772793	27774057	1	PTHR33448:SF4 - ARABIDOPSIS THALIANA GENOMIC DNA, CHROMOSOME 5, P1 CLONE:MOK16-RELATED			PTHR33448
QTL_Fe_7_27864996			Phvul.007G164900	Chr07	27778543	27780161	-1	PTHR11260:SF263 - GLUTATHIONE S-TRANSFERASE F13	PF00043	Glutathione S-transferase, C-terminal domain	PTHR11260	GLUTATHIONE S-TRANSFERASE, GST, SUPERFAMILY, GST DOMAIN CONTAINING	KOG0867	Glutathione S-transferase	EC 2.5.1.18	Glutathione transferase.	K00799	glutathione S-transferase [EC:2.5.1.18]	GO:0005515
QTL_Fe_7_27864996			Phvul.007G165000	Chr07	27802437	27803322	1
QTL_Fe_7_27864996			Phvul.007G165100	Chr07	27830959	27831414	-1	PTHR11064:SF42 - NUCLEAR TRANSCRIPTION FACTOR Y SUBUNIT B-5	PF00808	Histone-like transcription factor (CBF/NF-Y) and archaeal histone	PTHR11064	CCAAT-BINDING TRANSCRIPTION FACTOR-RELATED	KOG0869	CCAAT-binding factor, subunit A (HAP3)
QTL_Fe_7_27864996			Phvul.007G165133	Chr07	27862484	27865963	1	PTHR10593//PTHR10593:SF34 - SERINE/THREONINE-PROTEIN KINASE RIO // SUBFAMILY NOT NAMED	PF12171	Zinc-finger double-stranded RNA-binding	PTHR10593	SERINE/THREONINE-PROTEIN KINASE RIO
QTL_Fe_7_27864996			Phvul.007G165166	Chr07	27868704	27875618	-1	PTHR11562:SF18 - MITOCHONDRIAL METAL TRANSPORTER 1-RELATED	PF16916		PTHR11562	CATION EFFLUX PROTEIN/ ZINC TRANSPORTER	KOG1485	Mitochondrial Fe2+ transporter MMT1 and related transporters (cation diffusion facilitator superfamily)					GO:0055085
QTL_Fe_7_27864996			Phvul.007G165200	Chr07	27913036	27917406	1		PF00642	Zinc finger C-x8-C-x5-C-x3-H type (and similar)	PTHR12506	PROTEIN PHOSPHATASE RELATED	KOG1677	CCCH-type Zn-finger protein					GO:0046872
QTL_Fe_7_27864996			Phvul.007G165250	Chr07	27943978	27945597	1
QTL_Fe_7_27864996			Phvul.007G165300	Chr07	27955385	27959715	1	PTHR31339:SF12 - POLYGALACTURONASE-LIKE PROTEIN	PF12708	Pectate lyase superfamily protein	PTHR31339	FAMILY NOT NAMED
QTL_Ca_7_38956026			Phvul.007G267600	Chr07	38871259	38872086	1	PF02701 - Dof domain, zinc finger (zf-Dof) (1 of 41)	PF02701	Dof domain, zinc finger	PTHR31992	FAMILY NOT NAMED							GO:0006355
QTL_Ca_7_38956026			Phvul.007G267700	Chr07	38879211	38880909	-1	PTHR22849:SF38 - E3 UBIQUITIN-PROTEIN LIGASE PUB22-RELATED	PF04564	U-box domain	PTHR22849	WDSAM1 PROTEIN			EC 6.3.2.19	Ubiquitin--protein ligase.			GO:0016567
QTL_Ca_7_38956026			Phvul.007G267800	Chr07	38893531	38895587	-1	PTHR22849//PTHR22849:SF24 - WDSAM1 PROTEIN // SUBFAMILY NOT NAMED	PF04564	U-box domain	PTHR22849	WDSAM1 PROTEIN			EC 6.3.2.19	Ubiquitin--protein ligase.			GO:0016567
QTL_Ca_7_38956026			Phvul.007G267900	Chr07	38901727	38906220	-1	PTHR11850:SF111 - BEL1-LIKE HOMEODOMAIN PROTEIN 1-RELATED	PF05920	Homeobox KN domain	PTHR11850	HOMEOBOX PROTEIN TRANSCRIPTION FACTORS	KOG0773	Transcription factor MEIS1 and related HOX domain proteins					GO:0006355
QTL_Ca_7_38956026			Phvul.007G268000	Chr07	38922613	38924853	1	PTHR13943//PTHR13943:SF44 - HRAS-LIKE SUPPRESSOR - RELATED // SUBFAMILY NOT NAMED	PF04970	Lecithin retinol acyltransferase	PTHR13943	HRAS-LIKE SUPPRESSOR - RELATED
QTL_Ca_7_38956026			Phvul.007G268100	Chr07	38926720	38929382	-1	K14842 - ribosome biogenesis protein NSA2 (NSA2)	PF01201	Ribosomal protein S8e	PTHR12642	FAMILY NOT NAMED	KOG3163	Uncharacterized conserved protein related to ribosomal protein S8E			K14842	ribosome biogenesis protein NSA2
QTL_Ca_7_38956026			Phvul.007G268200	Chr07	38944235	38948252	1	2.7.11.1 - Non-specific serine/threonine protein kinase / Threonine-specific protein kinase (1 of 1198)	PF07714	Protein tyrosine kinase	PTHR27001		KOG1187	Serine/threonine protein kinase	EC 2.7.11.1	Non-specific serine/threonine protein kinase.			GO:0006468
QTL_Ca_7_38956026			Phvul.007G268300	Chr07	38950910	38952376	1	PTHR36351:SF1 - EMBRYO SAC DEVELOPMENT ARREST 12 PROTEIN			PTHR36351
QTL_Ca_7_38956026			Phvul.007G268400	Chr07	38960563	38961721	1	PTHR31852:SF28 - HYDROXYPROLINE-RICH GLYCOPROTEIN FAMILY PROTEIN			PTHR31852	FAMILY NOT NAMED
QTL_Ca_7_38956026			Phvul.007G268500	Chr07	38970861	38971710	-1				PTHR31852	FAMILY NOT NAMED
QTL_Ca_7_38956026			Phvul.007G268600	Chr07	38981117	38982594	1	PTHR31415:SF2 - LATE EMBRYOGENESIS ABUNDANT HYDROXYPROLINE-RICH GLYCOPROTEIN-RELATED	PF03168	Late embryogenesis abundant protein	PTHR31415	FAMILY NOT NAMED
QTL_Ca_7_38956026			Phvul.007G268700	Chr07	38985430	38986354	1	PTHR31415:SF4 - HARPIN-INDUCED PROTEIN-LIKE-RELATED	PF03168	Late embryogenesis abundant protein	PTHR31415	FAMILY NOT NAMED
QTL_Ca_7_38956026			Phvul.007G268800	Chr07	38986531	38987745	1	PTHR31415:SF4 - HARPIN-INDUCED PROTEIN-LIKE-RELATED			PTHR31415	FAMILY NOT NAMED
QTL_Ca_7_38956026			Phvul.007G268900	Chr07	38992481	38993360	1	PTHR31415:SF4 - HARPIN-INDUCED PROTEIN-LIKE-RELATED	PF03168	Late embryogenesis abundant protein	PTHR31415	FAMILY NOT NAMED
QTL_Ca_7_38956026			Phvul.007G269000	Chr07	38998375	38999481	-1				PTHR34054
QTL_Ca_7_38956026			Phvul.007G269100	Chr07	39018766	39023082	1	PTHR11638//PTHR11638:SF69 - ATP-DEPENDENT CLP PROTEASE // SUBFAMILY NOT NAMED	PF02861	Clp amino terminal domain	PTHR11638	ATP-DEPENDENT CLP PROTEASE	KOG1051	Chaperone HSP104 and related ATP-dependent Clp proteases					GO:0019538
QTL_Ca_7_38956026			Phvul.007G269200	Chr07	39025054	39035398	-1		PF09758	Uncharacterised conserved protein	PTHR21481	UNCHARACTERIZED	KOG2219	Uncharacterized conserved protein
QTL_Ca_7_38956026			Phvul.007G269300	Chr07	39036469	39038171	1	PTHR13683//PTHR13683:SF225 - ASPARTYL PROTEASES // SUBFAMILY NOT NAMED	PF14543	Xylanase inhibitor N-terminal	PTHR13683	ASPARTYL PROTEASES	KOG1339	Aspartyl protease	EC 3.4.23.12	Nepenthesin.			GO:0006508
QTL_Mn_8_6963598			Phvul.008G073100	Chr08	6868548	6869240	-1	PTHR32246:SF20 - BON1-ASSOCIATED PROTEIN 1-RELATED	PF00168	C2 domain	PTHR32246	FAMILY NOT NAMED							GO:0005515
QTL_Mn_8_6963598			Phvul.008G073200	Chr08	6905091	6907009	-1	1.10.3.1 - Catechol oxidase / Tyrosinase	PF12142	Polyphenol oxidase middle domain	PTHR11474	TYROSINASE			EC 1.10.3.1	Catechol oxidase.	K00422	polyphenol oxidase [EC:1.10.3.1]	GO:0055114
QTL_Mn_8_6963598			Phvul.008G073300	Chr08	6917677	6920726	-1				PTHR21660	THIOESTERASE SUPERFAMILY MEMBER-RELATED
QTL_Mn_8_6963598			Phvul.008G073400	Chr08	6926855	6930725	1	PTHR10774//PTHR10774:SF58 - EXTENDED SYNAPTOTAGMIN-RELATED // SUBFAMILY NOT NAMED	PF00168	C2 domain	PTHR10774	EXTENDED SYNAPTOTAGMIN-RELATED	KOG1030	Predicted Ca2+-dependent phospholipid-binding protein					GO:0005515
QTL_Mn_8_6963598			Phvul.008G073500	Chr08	6937686	6938853	1	PF12937 - F-box-like (F-box-like) (1 of 53)	PF12937	F-box-like	PTHR24006	FAMILY NOT NAMED							GO:0005515
QTL_Mn_8_6963598			Phvul.008G073600	Chr08	6941655	6942809	-1	PF12937 - F-box-like (F-box-like) (1 of 53)	PF12937	F-box-like	PTHR24006	FAMILY NOT NAMED							GO:0005515
QTL_Mn_8_6963598			Phvul.008G073700	Chr08	6959126	6965524	-1	PTHR10795:SF320 - SUBTILASE FAMILY PROTEIN-RELATED	PF05922	Peptidase inhibitor I9	PTHR10795	PROPROTEIN CONVERTASE SUBTILISIN/KEXIN			EC 3.4.21.25	Cucumisin.			GO:0006508
QTL_Mn_8_6963598			Phvul.008G073800	Chr08	6983992	6998419	1	PTHR11945//PTHR11945:SF222 - MADS BOX PROTEIN // SUBFAMILY NOT NAMED	PF00319	SRF-type transcription factor (DNA-binding and dimerisation domain)	PTHR11945	MADS BOX PROTEIN	KOG0014	MADS box transcription factor					GO:0046983
QTL_Mn_8_6963598			Phvul.008G073900	Chr08	7000092	7004471	-1	PTHR10584:SF192 - FRUCTOKINASE 1	PF00294	pfkB family carbohydrate kinase	PTHR10584	SUGAR KINASE	KOG2855	Ribokinase	EC 2.7.1.4	Fructokinase.	K00847	fructokinase [EC:2.7.1.4]
QTL_Mn_8_6963598			Phvul.008G074000	Chr08	7013597	7018842	1	PTHR32116:SF4 - POLYGALACTURONATE 4-ALPHA-GALACTURONOSYLTRANSFERASE-RELATED	PF01501	Glycosyl transferase family 8	PTHR32116	FAMILY NOT NAMED			EC 2.4.1.43	Polygalacturonate 4-alpha-galacturonosyltransferase.	K13648	alpha-1,4-galacturonosyltransferase [EC:2.4.1.43]	GO:0016757
QTL_Mn_8_6963598			Phvul.008G074100	Chr08	7022615	7031313	-1	PTHR10774:SF51 - C2 CALCIUM/LIPID-BINDING ENDONUCLEASE/EXONUCLEASE/PHOSPHATASE-RELATED	PF17047		PTHR10774	EXTENDED SYNAPTOTAGMIN-RELATED							GO:0005515
QTL_Mn_8_6963598			Phvul.008G074200	Chr08	7035370	7036638	-1	PF02298 - Plastocyanin-like domain (Cu_bind_like) (1 of 53)	PF02298	Plastocyanin-like domain	PTHR33021								GO:0009055
QTL_Mn_8_6963598			Phvul.008G074300	Chr08	7037969	7039826	-1	4.1.1.36 - Phosphopantothenoylcysteine decarboxylase / N-((R)-4'-phosphopantothenoyl)-L-cysteine carboxy-lyase	PF02441	Flavoprotein	PTHR14359	HOMO-OLIGOMERIC FLAVIN CONTAINING CYS DECARBOXYLASE FAMILY	KOG0672	Halotolerance protein HAL3 (contains flavoprotein domain)	EC 4.1.1.36	Phosphopantothenoylcysteine decarboxylase.	K01598	phosphopantothenoylcysteine decarboxylase [EC:4.1.1.36]	GO:0003824
QTL_Mn_8_6963598			Phvul.008G074400	Chr08	7047794	7052103	1	KOG0987 - DNA helicase PIF1/RRM3	PF14214	Helitron helicase-like domain at N-terminus	PTHR10492	UNCHARACTERIZED	KOG0987	DNA helicase PIF1/RRM3	EC 3.6.4.12	DNA helicase.			GO:0006281
QTL_Mn_8_6963598			Phvul.008G074500	Chr08	7054573	7056270	-1	4.1.1.36 - Phosphopantothenoylcysteine decarboxylase / N-((R)-4'-phosphopantothenoyl)-L-cysteine carboxy-lyase	PF02441	Flavoprotein	PTHR14359	HOMO-OLIGOMERIC FLAVIN CONTAINING CYS DECARBOXYLASE FAMILY	KOG0672	Halotolerance protein HAL3 (contains flavoprotein domain)	EC 4.1.1.36	Phosphopantothenoylcysteine decarboxylase.	K01598	phosphopantothenoylcysteine decarboxylase [EC:4.1.1.36]	GO:0003824
QTL_Mg_8_41708004			Phvul.008G154900	Chr08	41667935	41670140	-1		PF01217	Clathrin adaptor complex small chain	PTHR11753	CLATHRIN COAT ASSEMBLY PROTEIN					K12403	AP-4 complex subunit sigma-1	GO:0015031
QTL_Mg_8_41708004			Phvul.008G147200	Chr08	41753989	41756146	-1	PTHR10666//PTHR10666:SF127 - UBIQUITIN // SUBFAMILY NOT NAMED	PF00240	Ubiquitin family	PTHR10666	UBIQUITIN							GO:0005515
QTL_Cu_8_52162199			Phvul.008G184900	Chr08	52082198	52083414	1				PTHR34291
QTL_Cu_8_52162199			Phvul.008G185000	Chr08	52129836	52132078	1	PTHR10579//PTHR10579:SF55 - CALCIUM-ACTIVATED CHLORIDE CHANNEL REGULATOR // SUBFAMILY NOT NAMED	PF17123		PTHR10579	CALCIUM-ACTIVATED CHLORIDE CHANNEL REGULATOR
QTL_Cu_8_52162199			Phvul.008G185100	Chr08	52151085	52154593	-1	1.2.1.70 - Glutamyl-tRNA reductase	PF03807	NADP oxidoreductase coenzyme F420-dependent	PTHR13812	ORNITHINE CYCLODEAMINASE-RELATED			EC 1.2.1.70	Glutamyl-tRNA reductase.	K02492	glutamyl-tRNA reductase [EC:1.2.1.70]	GO:0055114
QTL_Cu_8_52162199			Phvul.008G185200	Chr08	52214160	52216357	-1	PTHR11206:SF92 - MATE EFFLUX FAMILY PROTEIN	PF01554	MatE	PTHR11206	MULTIDRUG RESISTANCE PROTEIN	KOG1347	Uncharacterized membrane protein, predicted efflux pump			K03327	multidrug resistance protein, MATE family	GO:0055085
QTL_Cu_8_52162199			Phvul.008G185300	Chr08	52222492	52231916	-1	K15378 - solute carrier family 45, member 1/2/4 (SLC45A1_2_4)	PF13347	MFS/sugar transport protein	PTHR19432	SUGAR TRANSPORTER					K15378	0
QTL_Cu_8_52162199			Phvul.008G185400	Chr08	52251229	52258090	1	PTHR32467:SF18 - FLORAL HOMEOTIC PROTEIN APETALA 2	PF00847	AP2 domain	PTHR32467	FAMILY NOT NAMED					K09284	AP2-like factor, euAP2 lineage	GO:0006355
QTL_Cu_8_52162199			Phvul.008G185500	Chr08	52258136	52259336	-1	PTHR11728:SF13 - GLYCEROL-3-PHOSPHATE DEHYDROGENASE [NAD(+)] 2, CHLOROPLASTIC	PF07479	NAD-dependent glycerol-3-phosphate dehydrogenase C-terminus	PTHR11728	GLYCEROL-3-PHOSPHATE DEHYDROGENASE			EC 1.1.1.8	Glycerol-3-phosphate dehydrogenase (NAD(+)).	K00006	glycerol-3-phosphate dehydrogenase (NAD+) [EC:1.1.1.8]	GO:0055114
QTL_Ca_9_8733609			Phvul.009G042600	Chr09	8633736	8637094	1	PF11331 - Probable zinc-ribbon domain (zinc_ribbon_12)	PF11331	Protein of unknown function (DUF3133)	PTHR31105	FAMILY NOT NAMED
QTL_Ca_9_8733609			Phvul.009G042700	Chr09	8638151	8641326	-1	K15025 - probable RNA-binding protein EIF1AD (EIF1AD)	PF01176	Translation initiation factor 1A / IF-1	PTHR21641	TRANSLATION INITIATION FACTOR-RELATED	KOG2925	Predicted translation initiation factor related to eIF-1A			K15025	0	GO:0006413
QTL_Ca_9_8733609			Phvul.009G042800	Chr09	8650251	8650860	1				PTHR37758
QTL_Ca_9_8733609			Phvul.009G042900	Chr09	8651989	8656003	-1		PF08711	TFIIS helical bundle-like domain	PTHR11477	TRANSCRIPTION ELONGATION FACTOR S-II	KOG1105	Transcription elongation factor TFIIS/Cofactor of enhancer-binding protein Sp1			K03145	transcription elongation factor S-II	GO:0006351
QTL_Ca_9_8733609			Phvul.009G043000	Chr09	8659965	8662706	-1
QTL_Ca_9_8733609			Phvul.009G043100	Chr09	8679869	8682355	1	PF03106 - WRKY DNA -binding domain (WRKY) (1 of 91)	PF03106	WRKY DNA -binding domain	PTHR31282	FAMILY NOT NAMED							GO:0043565
QTL_Ca_9_8733609			Phvul.009G043200	Chr09	8686187	8688977	-1		PF03106	WRKY DNA -binding domain	PTHR31282	FAMILY NOT NAMED							GO:0043565
QTL_Ca_9_8733609			Phvul.009G043300	Chr09	8708957	8709847	1
QTL_Ca_9_8733609			Phvul.009G043400	Chr09	8710093	8711657	-1	PTHR26402:SF521 - TWO-COMPONENT RESPONSE REGULATOR ARR16-RELATED	PF00072	Response regulator receiver domain	PTHR26402	RESPONSE REGULATOR OF TWO-COMPONENT SYSTEM					K14492	two-component response regulator ARR-A family	GO:0000160
QTL_Ca_9_8733609			Phvul.009G043500	Chr09	8724821	8732815	-1	K15437 - aminoacyl tRNA synthase complex-interacting multifunctional protein 1 (AIMP1, ARC1)	PF01588	Putative tRNA binding domain	PTHR11586	FAMILY NOT NAMED	KOG2241	tRNA-binding protein	EC 6.1.1.10	Methionine--tRNA ligase.	K15437	0	GO:0000049
QTL_Ca_9_8733609			Phvul.009G043600	Chr09	8753103	8757716	1		PF08263	Leucine rich repeat N-terminal domain	PTHR27000		KOG1187	Serine/threonine protein kinase	EC 2.7.11.1	Non-specific serine/threonine protein kinase.			GO:0005515
QTL_Ca_9_8733609			Phvul.009G043700	Chr09	8779518	8780270	-1	PF13912 - C2H2-type zinc finger (zf-C2H2_6) (1 of 42)	PF13912	C2H2-type zinc finger	0
QTL_Ca_9_8733609			Phvul.009G043800	Chr09	8788738	8789490	-1	PF13912 - C2H2-type zinc finger (zf-C2H2_6) (1 of 42)	PF13912	C2H2-type zinc finger	0
QTL_Ca_9_8733609			Phvul.009G043900	Chr09	8798389	8803292	1	PTHR33644:SF3 - U-BOX DOMAIN-CONTAINING PROTEIN 62-RELATED	PF04564	U-box domain	PTHR33644								GO:0016567
QTL_Ca_9_8733609			Phvul.009G044000	Chr09	8804503	8804823	1				PTHR35127
QTL_Ca_9_8733609			Phvul.009G044100	Chr09	8805334	8806942	-1				PTHR35127
QTL_Ca_9_8733609			Phvul.009G044150	Chr09	8820163	8821452	1
QTL_Ca_9_8733609			Phvul.009G044200	Chr09	8822611	8824989	-1	K03626 - nascent polypeptide-associated complex subunit alpha (EGD2, NACA)	PF01849	NAC domain	PTHR21713	NASCENT POLYPEPTIDE ASSOCIATED COMPLEX ALPHA SUBUNIT-RELATED	KOG2239	Transcription factor containing NAC and TS-N domains			K03626	nascent polypeptide-associated complex subunit alpha
QTL_Ca_9_8733609			Phvul.009G044300	Chr09	8832687	8833484	-1				PTHR33443
QTL_Ca_9_11355026			Phvul.009G062600	Chr09	11266362	11267057	1	PTHR34052:SF1 - AUXIN RESPONSE FACTOR 30-RELATED	PF02298	Plastocyanin-like domain	PTHR34052								GO:0009055
QTL_Ca_9_11355026			Phvul.009G062700	Chr09	11272478	11273152	-1	PTHR10641//PTHR10641:SF611 - MYB-LIKE DNA-BINDING PROTEIN MYB // SUBFAMILY NOT NAMED	PF00249	Myb-like DNA-binding domain	PTHR10641	MYB-LIKE DNA-BINDING PROTEIN MYB
QTL_Ca_9_11355026			Phvul.009G062800	Chr09	11287507	11288202	-1	PF04759 - Protein of unknown function, DUF617 (DUF617)	PF04759	Protein of unknown function, DUF617	PTHR31696	FAMILY NOT NAMED
QTL_Ca_9_11355026			Phvul.009G062900	Chr09	11294428	11298475	-1		PF14389	Leucine-zipper of ternary complex factor MIP1	PTHR23054	UNCHARACTERIZED
QTL_Ca_9_11355026			Phvul.009G063000	Chr09	11310251	11311724	-1	PTHR33095:SF7 - AR781	PF07816	Protein of unknown function (DUF1645)	PTHR33095
QTL_Ca_9_11355026			Phvul.009G063100	Chr09	11318084	11326628	-1	4.2.1.75 - Uroporphyrinogen-III synthase / Uroporphyrinogen-III cosynthetase	PF02602	Uroporphyrinogen-III synthase HemD	0				EC 4.2.1.75	Uroporphyrinogen-III synthase.	K01719	uroporphyrinogen-III synthase [EC:4.2.1.75]	GO:0033014
QTL_Ca_9_11355026			Phvul.009G063200	Chr09	11331317	11337319	-1	PTHR24012:SF403 - POLYADENYLATE-BINDING PROTEIN RBP47A	PF00076	RNA recognition motif. (a.k.a. RRM, RBD, or RNP domain)	PTHR24012	FAMILY NOT NAMED	KOG0148	Apoptosis-promoting RNA-binding protein TIA-1/TIAR (RRM superfamily)					GO:0003676
QTL_Ca_9_11355026			Phvul.009G063300	Chr09	11343038	11343647	-1	PTHR33348:SF3 - C-TERMINALLY ENCODED PEPTIDE 1			PTHR33348
QTL_Ca_9_11355026	QTL_Ca_9_11451916		Phvul.009G063400	Chr09	11354512	11356095	-1	PF00685 - Sulfotransferase domain (Sulfotransfer_1)	PF00685	Sulfotransferase domain	PTHR32175	FAMILY NOT NAMED							GO:0008146
QTL_Ca_9_11355026	QTL_Ca_9_11451916		Phvul.009G063500	Chr09	11366695	11373091	1	KOG0513 - Ca2+-independent phospholipase A2	PF01734	Patatin-like phospholipase	PTHR32176	FAMILY NOT NAMED	KOG0513	Ca2+-independent phospholipase A2					GO:0006629
QTL_Ca_9_11355026	QTL_Ca_9_11451916		Phvul.009G063600	Chr09	11371478	11373200	-1	PTHR23024:SF131 - CARBOXYLESTERASE 2-RELATED	PF00135	Carboxylesterase family	PTHR23024	MEMBER OF 'GDXG' FAMILY OF LIPOLYTIC ENZYMES	KOG1515	Arylacetamide deacetylase	EC 3.1.1.1	Carboxylesterase.
QTL_Ca_9_11355026	QTL_Ca_9_11451916		Phvul.009G063700	Chr09	11383896	11385160	-1				PTHR36324
QTL_Ca_9_11355026	QTL_Ca_9_11451916		Phvul.009G063800	Chr09	11386616	11390760	-1	PF14295 - PAN domain (PAN_4)	PF14295	PAN domain	PTHR33344
QTL_Ca_9_11355026	QTL_Ca_9_11451916		Phvul.009G063900	Chr09	11394707	11401729	1	KOG2521 - Uncharacterized conserved protein	PF05705	Eukaryotic protein of unknown function (DUF829)	PTHR12265	UNCHARACTERIZED	KOG2521	Uncharacterized conserved protein
QTL_Ca_9_11355026	QTL_Ca_9_11451916	QTL_Ca_9_11504334	Phvul.009G064000	Chr09	11402585	11405582	1	K15891 - farnesol dehydrogenase (FLDH)	PF01073	3-beta hydroxysteroid dehydrogenase/isomerase family	PTHR10366	NAD DEPENDENT EPIMERASE/DEHYDRATASE	KOG1502	Flavonol reductase/cinnamoyl-CoA reductase	EC 1.1.1.354	Farnesol dehydrogenase (NAD(+)).	K15891	0	GO:0055114
QTL_Ca_9_11355026	QTL_Ca_9_11451916	QTL_Ca_9_11504334	Phvul.009G064100	Chr09	11408142	11412468	1	PF02362 - B3 DNA binding domain (B3) (1 of 72)	PF02362	B3 DNA binding domain	PTHR31391	FAMILY NOT NAMED							GO:0003677
QTL_Ca_9_11355026	QTL_Ca_9_11451916	QTL_Ca_9_11504334	Phvul.009G064150	Chr09	11410570	11411719	1
QTL_Ca_9_11355026	QTL_Ca_9_11451916	QTL_Ca_9_11504334	Phvul.009G064200	Chr09	11415979	11421091	1	PTHR13832:SF25 - PROTEIN PHOSPHATASE 2C 12-RELATED	PF00481	Protein phosphatase 2C	PTHR13832	PROTEIN PHOSPHATASE 2C	KOG0698	Serine/threonine protein phosphatase	EC 3.1.3.16	Phosphoprotein phosphatase.			GO:0003824
QTL_Ca_9_11355026	QTL_Ca_9_11451916	QTL_Ca_9_11504334	Phvul.009G064300	Chr09	11431250	11432882	1	K14499 - BRI1 kinase inhibitor 1 (BKI1)			PTHR33312						K14499	BRI1 kinase inhibitor 1
QTL_Ca_9_11355026	QTL_Ca_9_11451916	QTL_Ca_9_11504334	Phvul.009G064400	Chr09	11434675	11443515	1	K15728 - phosphatidate phosphatase LPIN (LPIN)	PF04571	lipin, N-terminal conserved region	PTHR12181	LIPIN	KOG2116	Protein involved in plasmid maintenance/nuclear protein involved in lipid metabolism	EC 3.1.3.4	Phosphatidate phosphatase.	K15728	0
QTL_Ca_9_11355026	QTL_Ca_9_11451916	QTL_Ca_9_11504334	Phvul.009G064500	Chr09	11449039	11449326	-1	PF13202 - EF hand (EF-hand_5)	PF13202	EF hand	0								GO:0005509
QTL_Ca_9_11355026	QTL_Ca_9_11451916	QTL_Ca_9_11504334	Phvul.009G064600	Chr09	11451120	11455032	1	PTHR33926:SF2 - PROTEIN TIC 22, CHLOROPLASTIC	PF04278	Tic22-like family	PTHR33926
QTL_Ca_9_11355026	QTL_Ca_9_11451916	QTL_Ca_9_11504334	Phvul.009G064700	Chr09	11455601	11460523	1	PTHR11183:SF44 - UDP-GLUCURONATE:XYLAN ALPHA-GLUCURONOSYLTRANSFERASE 2	PF01501	Glycosyl transferase family 8	PTHR11183	GLYCOGENIN	KOG1950	Glycosyl transferase, family 8 - glycogenin	EC 2.4.1.17	Glucuronosyltransferase.			GO:0016757
	QTL_Ca_9_11451916	QTL_Ca_9_11504334	Phvul.009G064800	Chr09	11465538	11471751	1		PF05701	Weak chloroplast movement under blue light	PTHR32054	FAMILY NOT NAMED
	QTL_Ca_9_11451916	QTL_Ca_9_11504334	Phvul.009G064900	Chr09	11473315	11474917	-1	K08911 - light-harvesting complex I chlorophyll a/b binding protein 5 (LHCA5)	PF00504	Chlorophyll A-B binding protein	PTHR21649	CHLOROPHYLL A/B BINDING PROTEIN					K08911	light-harvesting complex I chlorophyll a/b binding protein 5	GO:0016020
	QTL_Ca_9_11451916	QTL_Ca_9_11504334	Phvul.009G065000	Chr09	11475219	11478877	-1	PF08553 - VID27 cytoplasmic protein (VID27)	PF08553	VID27 cytoplasmic protein	PTHR31913	FAMILY NOT NAMED
	QTL_Ca_9_11451916	QTL_Ca_9_11504334	Phvul.009G065100	Chr09	11491054	11493144	-1	PF01535//PF13041 - PPR repeat (PPR) // PPR repeat family (PPR_2) (1 of 197)	PF01535	PPR repeat	PTHR24015	FAMILY NOT NAMED
	QTL_Ca_9_11451916	QTL_Ca_9_11504334	Phvul.009G065200	Chr09	11494485	11497290	1	PTHR10438:SF229 - THIOREDOXIN-LIKE 4, CHLOROPLASTIC	PF00085	Thioredoxin	PTHR10438	THIOREDOXIN	KOG0907	Thioredoxin	EC 3.5.1.52	Peptide-N(4)-(N-acetyl-beta-glucosaminyl)asparagine amidase.			GO:0045454
	QTL_Ca_9_11451916	QTL_Ca_9_11504334	Phvul.009G065300	Chr09	11497888	11502531	-1		PF03364	Polyketide cyclase / dehydrase and lipid transport	PTHR12901	SPERM PROTEIN HOMOLOG
	QTL_Ca_9_11451916	QTL_Ca_9_11504334	Phvul.009G065400	Chr09	11505947	11510296	1	PF11523 - Protein of unknown function (DUF3223) (DUF3223)	PF11523	Protein of unknown function (DUF3223)	PTHR33415
		QTL_Ca_9_11504334	Phvul.009G065500	Chr09	11533555	11538324	1		PF00170	bZIP transcription factor	PTHR22952	CAMP-RESPONSE ELEMENT BINDING PROTEIN-RELATED					K14432	ABA responsive element binding factor	GO:0043565
		QTL_Ca_9_11504334	Phvul.009G065600	Chr09	11539385	11545892	-1	K13174 - THO complex subunit 5 (THOC5)	PF09766	Fms-interacting protein	PTHR13375	FMS INTERACTING PROTEIN	KOG2216	Conserved coiled/coiled coil protein			K13174	THO complex subunit 5
		QTL_Ca_9_11504334	Phvul.009G065700	Chr09	11554342	11555154	-1	PTHR12565//PTHR12565:SF118 - STEROL REGULATORY ELEMENT-BINDING PROTEIN // SUBFAMILY NOT NAMED	PF00010	Helix-loop-helix DNA-binding domain	PTHR12565	STEROL REGULATORY ELEMENT-BINDING PROTEIN							GO:0046983
		QTL_Ca_9_11504334	Phvul.009G065800	Chr09	11579133	11580795	-1	PTHR10015:SF159 - HEAT STRESS TRANSCRIPTION FACTOR B-4	PF00447	HSF-type DNA-binding	PTHR10015	HEAT SHOCK TRANSCRIPTION FACTOR					K09419	heat shock transcription factor, other eukaryote	GO:0043565
		QTL_Ca_9_11504334	Phvul.009G065900	Chr09	11598852	11599058	1
QTL_Ca_9_23846015			Phvul.009G160800	Chr09	23748211	23750844	1	PTHR10174//PTHR10174:SF145 - RETINALDEHYDE BINDING PROTEIN-RELATED // SUBFAMILY NOT NAMED	PF13716	Divergent CRAL/TRIO domain	PTHR10174	RETINALDEHYDE BINDING PROTEIN-RELATED	KOG1470	Phosphatidylinositol transfer protein PDR16 and related proteins
QTL_Ca_9_23846015			Phvul.009G160900	Chr09	23762083	23764732	1	PTHR36079:SF1 - PROTEIN LEAFY	PF01698	Floricaula / Leafy protein	PTHR36079								GO:0006355
QTL_Ca_9_23846015			Phvul.009G161000	Chr09	23795115	23797183	-1	PF00847 - AP2 domain (AP2) (1 of 180)	PF00847	AP2 domain	PTHR31190	FAMILY NOT NAMED							GO:0006355
QTL_Ca_9_23846015			Phvul.009G161100	Chr09	23804764	23815160	-1	PTHR10857:SF26 - PROTEIN BONZAI 3	PF00168	C2 domain	PTHR10857	COPINE							GO:0005515
QTL_Ca_9_23846015			Phvul.009G161200	Chr09	23824818	23827347	-1	PTHR10857//PTHR10857:SF12 - COPINE // SUBFAMILY NOT NAMED	PF10539	Development and cell death domain	PTHR10857	COPINE
QTL_Ca_9_23846015			Phvul.009G161300	Chr09	23864867	23870281	-1	PTHR22850:SF115 - TRANSDUCIN/WD40 DOMAIN-CONTAINING PROTEIN			PTHR22850	WD40 REPEAT FAMILY	KOG0265	U5 snRNP-specific protein-like factor and related proteins
QTL_Ca_9_23846015			Phvul.009G161400	Chr09	23879433	23887984	-1		PF00076	RNA recognition motif. (a.k.a. RRM, RBD, or RNP domain)	PTHR24012	FAMILY NOT NAMED	KOG4660	Protein Mei2, essential for commitment to meiosis, and related proteins					GO:0003676
QTL_Mg_9_31752041			Phvul.009G209100	Chr09	31654958	31657782	-1	PTHR10766:SF54 - ENDOMEMBRANE FAMILY PROTEIN 70	PF02990	Endomembrane protein 70	PTHR10766	TRANSMEMBRANE 9 SUPERFAMILY PROTEIN					K17086	0	GO:0016021
QTL_Mg_9_31752041			Phvul.009G209200	Chr09	31672168	31675778	1	PF00069//PF08263//PF13855 - Protein kinase domain (Pkinase) // Leucine rich repeat N-terminal domain (LRRNT_2) // Leucine rich repeat (LRR_8) (1 of 41)	PF08263	Leucine rich repeat N-terminal domain	PTHR27000		KOG1187	Serine/threonine protein kinase	EC 2.7.11.1	Non-specific serine/threonine protein kinase.			GO:0005515
QTL_Mg_9_31752041			Phvul.009G209300	Chr09	31679224	31679936	1	PTHR35121:SF2 - GB			PTHR35121
QTL_Mg_9_31752041			Phvul.009G209400	Chr09	31686413	31694702	1	K17964 - leucine-rich PPR motif-containing protein, mitochondrial (LRPPRC)	PF12854	PPR repeat	PTHR24015	FAMILY NOT NAMED					K17964	0
QTL_Mg_9_31752041			Phvul.009G209500	Chr09	31707623	31713542	1	PTHR11850//PTHR11850:SF127 - HOMEOBOX PROTEIN TRANSCRIPTION FACTORS // SUBFAMILY NOT NAMED	PF03789	ELK domain	PTHR11850	HOMEOBOX PROTEIN TRANSCRIPTION FACTORS	KOG0773	Transcription factor MEIS1 and related HOX domain proteins					GO:0003677
QTL_Mg_9_31752041			Phvul.009G209600	Chr09	31720551	31720973	-1				PTHR33168
QTL_Mg_9_31752041			Phvul.009G209700	Chr09	31721891	31728399	-1		PF00564	PB1 domain	PTHR23257	SERINE-THREONINE PROTEIN KINASE	KOG0192	Tyrosine kinase specific for activated (GTP-bound) p21cdc42Hs	EC 2.7.11.1	Non-specific serine/threonine protein kinase.			GO:0005515
QTL_Mg_9_31752041			Phvul.009G209800	Chr09	31752498	31754539	1	PTHR14155//PTHR14155:SF118 - RING FINGER DOMAIN-CONTAINING // SUBFAMILY NOT NAMED	PF13639	Ring finger domain	PTHR14155	RING FINGER DOMAIN-CONTAINING	KOG1493	Anaphase-promoting complex (APC), subunit 11					GO:0008270
QTL_Mg_9_31752041			Phvul.009G209900	Chr09	31756170	31759043	1				PTHR37392
QTL_Mg_9_31752041			Phvul.009G210000	Chr09	31766130	31768682	1		PF07690	Major Facilitator Superfamily	PTHR11662	SODIUM-DEPENDENT PHOSPHATE TRANSPORTERS							GO:0055085
QTL_Mg_9_31752041			Phvul.009G210100	Chr09	31769373	31772825	-1		PF00481	Protein phosphatase 2C	PTHR13832	PROTEIN PHOSPHATASE 2C	KOG0698	Serine/threonine protein phosphatase	EC 3.1.3.16	Phosphoprotein phosphatase.			GO:0003824
QTL_Mg_9_31752041			Phvul.009G210216	Chr09	31786296	31787779	-1				PTHR33743
QTL_Mg_9_31752041			Phvul.009G210332	Chr09	31800919	31803368	1	1.14.13.8 - Flavin-containing monooxygenase / Ziegler's enzyme	PF13738	Pyridine nucleotide-disulphide oxidoreductase	PTHR23023	DIMETHYLANILINE MONOOXYGENASE	KOG1399	Flavin-containing monooxygenase	EC 1.14.13.8	Flavin-containing monooxygenase.	K00485	dimethylaniline monooxygenase (N-oxide forming) [EC:1.14.13.8]
QTL_Mg_9_31752041			Phvul.009G210448	Chr09	31808005	31810865	1		PF00743	Flavin-binding monooxygenase-like	PTHR23023	DIMETHYLANILINE MONOOXYGENASE			EC 1.14.13.8	Flavin-containing monooxygenase.			GO:0055114
QTL_Mg_9_31752041			Phvul.009G210564	Chr09	31815395	31818496	1	PTHR10108:SF701 - METHYLTRANSFERASE TYPE 11 DOMAIN-CONTAINING PROTEIN-RELATED	PF08241	Methyltransferase domain	PTHR10108	METHYLTRANSFERASE			EC 2.1.1.163	Demethylmenaquinone methyltransferase.			GO:0008168
QTL_Mg_9_31752041	QTL_Mg_9_31933306		Phvul.009G210680	Chr09	31836729	31838525	1	PTHR31065:SF11 - PLATZ TRANSCRIPTION FACTOR FAMILY PROTEIN	PF04640	PLATZ transcription factor	PTHR31065	FAMILY NOT NAMED
	QTL_Mg_9_31933306		Phvul.009G210800	Chr09	31858450	31863972	1	PTHR31414:SF1 - TRANSMEMBRANE PROTEIN DDB_G0292058			PTHR31414	FAMILY NOT NAMED
	QTL_Mg_9_31933306		Phvul.009G210900	Chr09	31886970	31891386	1	PTHR31752:SF4 - AUXIN EFFLUX CARRIER COMPONENT 2	PF03547	Membrane transport protein	PTHR31752	FAMILY NOT NAMED					K13947	PIN; auxin efflux carrier family	GO:0055085
	QTL_Mg_9_31933306		Phvul.009G211000	Chr09	31904849	31905766	-1	PF02095 - Extensin-like protein repeat (Extensin_1)	PF02095	Extensin-like protein repeat	0								GO:0005199
	QTL_Mg_9_31933306		Phvul.009G211100	Chr09	31920509	31920922	-1	PF02095 - Extensin-like protein repeat (Extensin_1)	PF02095	Extensin-like protein repeat	0								GO:0005199
	QTL_Mg_9_31933306		Phvul.009G211150	Chr09	31920671	31926734	1
	QTL_Mg_9_31933306		Phvul.009G211200	Chr09	31932384	31932986	-1	PF02095 - Extensin-like protein repeat (Extensin_1)	PF02095	Extensin-like protein repeat	0								GO:0005199
	QTL_Mg_9_31933306		Phvul.009G211300	Chr09	31944574	31945245	1
	QTL_Mg_9_31933306		Phvul.009G211400	Chr09	31956769	31959527	1				PTHR37248
	QTL_Mg_9_31933306		Phvul.009G211500	Chr09	31963528	31968170	1	PTHR12313:SF0 - RING FINGER PROTEIN 5	PF13920	Zinc finger, C3HC4 type (RING finger)	PTHR12313	RNF5	KOG4172	Predicted E3 ubiquitin ligase			K10666	E3 ubiquitin-protein ligase RNF5 [EC:6.3.2.19]
	QTL_Mg_9_31933306		Phvul.009G211600	Chr09	31969063	31969599	1				PTHR33132
	QTL_Mg_9_31933306		Phvul.009G211700	Chr09	31986412	31987438	1				PTHR33132
	QTL_Mg_9_31933306		Phvul.009G211800	Chr09	31995363	31997191	-1	PTHR11071//PTHR11071:SF286 - PEPTIDYL-PROLYL CIS-TRANS ISOMERASE // SUBFAMILY NOT NAMED	PF00160	Cyclophilin type peptidyl-prolyl cis-trans isomerase/CLD	PTHR11071	PEPTIDYL-PROLYL CIS-TRANS ISOMERASE	KOG0880	Peptidyl-prolyl cis-trans isomerase	EC 5.2.1.8	Peptidylprolyl isomerase.	K03768	peptidyl-prolyl cis-trans isomerase B (cyclophilin B) [EC:5.2.1.8]	GO:0006457
	QTL_Mg_9_31933306		Phvul.009G211900	Chr09	32021756	32024966	1	PTHR21576:SF41 - MAJOR FACILITATOR SUPERFAMILY PROTEIN	PF06813	Nodulin-like	PTHR21576	UNCHARACTERIZED NODULIN-LIKE PROTEIN
	QTL_Mg_9_31933306		Phvul.009G212000	Chr09	32026045	32026869	-1				PTHR33915
QTL_Mg_9_32052922			Phvul.009G212100	Chr09	32090733	32095543	1	PTHR12948 - NEDD8 ULTIMATE BUSTER-1 BS4 PROTEIN			PTHR12948	NEDD8 ULTIMATE BUSTER-1 (BS4 PROTEIN)	KOG2561	Adaptor protein NUB1, contains UBA domain
QTL_Mg_9_32052922			Phvul.009G212200	Chr09	32096339	32100370	-1	K10088 - protein OS-9 (OS9)	PF07915	Glucosidase II beta subunit-like protein	PTHR15414	OS-9-RELATED					K10088	protein OS-9
QTL_Mg_9_32052922			Phvul.009G212300	Chr09	32102557	32111532	1	PTHR22904//PTHR22904:SF367 - TPR REPEAT CONTAINING PROTEIN // SUBFAMILY NOT NAMED	PF00515	Tetratricopeptide repeat	PTHR22904	TPR REPEAT CONTAINING PROTEIN	KOG4151	Myosin assembly protein/sexual cycle protein and related proteins					GO:0005515
QTL_Mg_9_32052922			Phvul.009G212400	Chr09	32126145	32130265	1	PTHR14363:SF16 - HEPARANASE-LIKE PROTEIN 3	PF03662	Glycosyl hydrolase family 79, N-terminal domain	PTHR14363	HEPARANASE-RELATED			EC 3.2.1.31	Beta-glucuronidase.	K07964	heparanase 1 [EC:3.2.1.-]	GO:0016798
QTL_Mg_9_32052922			Phvul.009G212500	Chr09	32134291	32143310	1	PTHR10926:SF29 - ALA-INTERACTING SUBUNIT 2-RELATED	PF03381	LEM3 (ligand-effect modulator 3) family / CDC50 family	PTHR10926	CELL CYCLE CONTROL PROTEIN 50	KOG2952	Cell cycle control protein					GO:0016020
QTL_Mg_9_32052922			Phvul.009G212600	Chr09	32150491	32150928	-1
QTL_Mg_10_1524933			Phvul.010G010200	Chr10	1473805	1476777	1	PTHR31867:SF9 - EXPANSIN-A6	PF03330	Rare lipoprotein A (RlpA)-like double-psi beta-barrel	PTHR31867	FAMILY NOT NAMED
QTL_Mg_10_1524933			Phvul.010G010300	Chr10	1480675	1484047	-1	2.7.10.2//2.7.11.1 - Non-specific protein-tyrosine kinase / Cytoplasmic protein tyrosine kinase // Non-specific serine/threonine protein kinase / Threonine-specific protein kinase (1 of 32)	PF07714	Protein tyrosine kinase	PTHR27001		KOG1187	Serine/threonine protein kinase	EC 2.7.11.1	Non-specific serine/threonine protein kinase.	K04733	interleukin-1 receptor-associated kinase 4 [EC:2.7.11.1]	GO:0006468
QTL_Mg_10_1524933	QTL_Mg_10_1595959		Phvul.010G012000	Chr10	1497191	1502173	1				PTHR34461
QTL_Mg_10_1524933	QTL_Mg_10_1595959		Phvul.010G011900	Chr10	1529446	1534930	1	PTHR11850:SF82 - BEL1-LIKE HOMEODOMAIN PROTEIN 8-RELATED	PF05920	Homeobox KN domain	PTHR11850	HOMEOBOX PROTEIN TRANSCRIPTION FACTORS	KOG0773	Transcription factor MEIS1 and related HOX domain proteins					GO:0006355
QTL_Mg_10_1524933	QTL_Mg_10_1595959		Phvul.010G011800	Chr10	1537972	1541419	1	KOG0752 - Mitochondrial solute carrier protein	PF00153	Mitochondrial carrier protein	PTHR24089	FAMILY NOT NAMED	KOG0752	Mitochondrial solute carrier protein
QTL_Mg_10_1524933	QTL_Mg_10_1595959		Phvul.010G011700	Chr10	1544233	1551706	1	5.4.4.2 - Isochorismate synthase / Isochorismate synthetase	PF00425	chorismate binding enzyme	PTHR11236	AMINOBENZOATE/ANTHRANILATE SYNTHASE	KOG1223	Isochorismate synthase	EC 5.4.4.2	Isochorismate synthase.	K02552	menaquinone-specific isochorismate synthase [EC:5.4.4.2]	GO:0009058
QTL_Mg_10_1524933	QTL_Mg_10_1595959		Phvul.010G011600	Chr10	1580869	1585471	1	PTHR31384:SF1 - AUXIN RESPONSE FACTOR 12-RELATED	PF02309	AUX/IAA family	PTHR31384	FAMILY NOT NAMED					K14486	auxin response factor	GO:0006355
QTL_Mg_10_1524933	QTL_Mg_10_1595959		Phvul.010G011500	Chr10	1591034	1594403	1	K09562 - hsp70-interacting protein (HSPBP1)	PF08609	Nucleotide exchange factor Fes1	PTHR19316	PROTEIN FOLDING REGULATOR	KOG2160	Armadillo/beta-catenin-like repeat-containing protein			K09562	hsp70-interacting protein
QTL_Mg_10_1524933	QTL_Mg_10_1595959		Phvul.010G011400	Chr10	1622170	1628245	1	PTHR11802:SF29 - SERINE CARBOXYPEPTIDASE-LIKE 1-RELATED	PF00450	Serine carboxypeptidase	PTHR11802	SERINE PROTEASE FAMILY S10 SERINE CARBOXYPEPTIDASE	KOG1282	Serine carboxypeptidases (lysosomal cathepsin A)					GO:0006508
	QTL_Mg_10_1595959		Phvul.010G011300	Chr10	1628157	1634533	1		PF13460	NADH(P)-binding	PTHR14194	NITROGEN METABOLIC REGULATION PROTEIN NMR-RELATED
	QTL_Mg_10_1595959		Phvul.010G011200	Chr10	1640896	1643536	1	PTHR12725:SF72 - HALOACID DEHALOGENASE-LIKE HYDROLASE (HAD) SUPERFAMILY PROTEIN	PF13419	Haloacid dehalogenase-like hydrolase	PTHR12725	HALOACID DEHALOGENASE-LIKE HYDROLASE	KOG3109	Haloacid dehalogenase-like hydrolase	EC 3.1.3.74	Pyridoxal phosphatase.
	QTL_Mg_10_1595959		Phvul.010G011100	Chr10	1655462	1657119	-1	K08998 - hypothetical protein (K08998)	PF01809	Haemolytic domain	PTHR33383						K08998	hypothetical protein
	QTL_Mg_10_1595959		Phvul.010G011000	Chr10	1660202	1663311	-1	PTHR24298:SF86 - CYTOCHROME P450 71B21-RELATED	PF00067	Cytochrome P450	PTHR24298	FAMILY NOT NAMED							GO:0055114
	QTL_Mg_10_1595959		Phvul.010G010900	Chr10	1669390	1672672	-1	PTHR24298:SF86 - CYTOCHROME P450 71B21-RELATED	PF00067	Cytochrome P450	PTHR24298	FAMILY NOT NAMED							GO:0055114
QTL_Mn_10_6845256			Phvul.010G044400	Chr10	6752648	6757217	1	PTHR24015:SF817 - EXPRESSED PROTEIN-RELATED	PF03407	Nucleotide-diphospho-sugar transferase	PTHR24015	FAMILY NOT NAMED
QTL_Mn_10_6845256			Phvul.010G044500	Chr10	6783685	6784189	1	PF03407 - Nucleotide-diphospho-sugar transferase (Nucleotid_trans)	PF03407	Nucleotide-diphospho-sugar transferase	0
QTL_Mn_10_6845256			Phvul.010G044600	Chr10	6794139	6800178	1	PTHR24015:SF817 - EXPRESSED PROTEIN-RELATED	PF03407	Nucleotide-diphospho-sugar transferase	PTHR24015	FAMILY NOT NAMED
QTL_Mn_10_6845256			Phvul.010G044700	Chr10	6805867	6811557	1		PF00076	RNA recognition motif. (a.k.a. RRM, RBD, or RNP domain)	PTHR24012	FAMILY NOT NAMED	KOG0117	Heterogeneous nuclear ribonucleoprotein R (RRM superfamily)					GO:0003676
QTL_Mn_10_6845256			Phvul.010G044800	Chr10	6815730	6818378	-1	PTHR15615:SF28 - CYCLIN-U4-1	PF00134	Cyclin, N-terminal domain	PTHR15615	UNCHARACTERIZED	KOG1674	Cyclin
QTL_Mn_10_6845256			Phvul.010G044900	Chr10	6827648	6828698	-1
QTL_Mn_10_6845256			Phvul.010G045000	Chr10	6828739	6840496	1
QTL_Mn_10_6845256			Phvul.010G045100	Chr10	6835826	6837187	1
QTL_Mn_10_6845256			Phvul.010G045200	Chr10	6880969	6883642	-1
QTL_Mn_10_6845256			Phvul.010G045300	Chr10	6929601	6934825	1	PTHR12771:SF20 - ELMO/CED-12 DOMAIN-CONTAINING PROTEIN	PF04727	ELMO/CED-12 family	PTHR12771	ENGULFMENT AND CELL MOTILITY	KOG2998	Uncharacterized conserved protein
QTL_Mn_10_6845256			Phvul.010G045400	Chr10	6941448	6943469	-1	2.7.4.6 - Nucleoside-diphosphate kinase / Nucleoside diphosphokinase	PF00334	Nucleoside diphosphate kinase	PTHR11349	NUCLEOSIDE DIPHOSPHATE KINASE	KOG0888	Nucleoside diphosphate kinase	EC 2.7.4.6	Nucleoside-diphosphate kinase.	K00940	nucleoside-diphosphate kinase [EC:2.7.4.6]	GO:0006241
QTL_Zn_10_12576659			Phvul.010G065000	Chr10	12559458	12561471	1
QTL_Mg_10_16507514			Phvul.010G073300	Chr10	16500398	16505167	1	PTHR27004:SF37 - DISEASE RESISTANCE FAMILY PROTEIN/LRR FAMILY PROTEIN-RELATED	PF08263	Leucine rich repeat N-terminal domain	PTHR27004		KOG0472	Leucine-rich repeat protein					GO:0005515
QTL_Mo_10_20089097			Phvul.010G072700	Chr10	20100458	20103308	-1		PF03514	GRAS domain family	PTHR31636	FAMILY NOT NAMED
QTL_Mo_10_20089097			Phvul.010G072800	Chr10	20173958	20177824	-1				PTHR33604
QTL_Mn_10_21149317	QTL_Mn_10_21209873		Phvul.010G078400	Chr10	21144108	21145832	-1	PF00249 - Myb-like DNA-binding domain (Myb_DNA-binding) (1 of 287)	PF00249	Myb-like DNA-binding domain	PTHR31314	FAMILY NOT NAMED
QTL_Mn_10_29484108			Phvul.010G079900	Chr10	29414408	29418458	-1	PTHR31707:SF11 - PECTINESTERASE/PECTINESTERASE INHIBITOR 17-RELATED	PF04043	Plant invertase/pectin methylesterase inhibitor	PTHR31707	FAMILY NOT NAMED			EC 3.1.1.11	Pectinesterase.	K01051	pectinesterase [EC:3.1.1.11]	GO:0004857
QTL_Mn_10_29484108			Phvul.010G067800	Chr10	29498754	29500419	1	PTHR33057:SF22 - OVATE FAMILY PROTEIN 1-RELATED	PF13724	DNA-binding domain	PTHR33057								GO:0003677
QTL_Mn_10_29484108			Phvul.010G067900	Chr10	29571197	29576345	-1	PTHR13902//PTHR13902:SF68 - SERINE/THREONINE-PROTEIN KINASE WNK WITH NO LYSINE -RELATED // SUBFAMILY NOT NAMED	PF00069	Protein kinase domain	PTHR13902	SERINE/THREONINE-PROTEIN KINASE WNK (WITH NO LYSINE)-RELATED			EC 2.7.11.1	Non-specific serine/threonine protein kinase.	K08867	WNK lysine deficient protein kinase [EC:2.7.11.1]	GO:0006468
QTL_Mn_10_29484108			Phvul.010G068000	Chr10	29576123	29576260	-1
QTL_Mo_10_30756216			Phvul.010G069200	Chr10	30806679	30807237	1
QTL_Mo_10_30756216			Phvul.010G069300	Chr10	30808442	30810087	-1	PTHR11002//PTHR11002:SF18 - CARBONIC ANHYDRASE // SUBFAMILY NOT NAMED			PTHR11002	FAMILY NOT NAMED			EC 4.2.1.1	Carbonate dehydratase.	K01673	carbonic anhydrase [EC:4.2.1.1]	GO:0008270
QTL_Mo_10_30756216			Phvul.010G069400	Chr10	30814861	30819755	-1		PF07168	Ureide permease	PTHR31081	FAMILY NOT NAMED							GO:0071705
QTL_Mo_10_30756216			Phvul.010G069500	Chr10	30837346	30838454	-1	PTHR33076:SF11 - BIFUNCTIONAL INHIBITOR/LIPID-TRANSFER PROTEIN/SEED STORAGE 2S ALBUMIN SUPERFAMILY PROTEIN-RELATED	PF00234	Protease inhibitor/seed storage/LTP family	PTHR33076
QTL_Mg_10_31481349			Phvul.010G070600	Chr10	31448914	31453904	1		PF00010	Helix-loop-helix DNA-binding domain	PTHR12565	STEROL REGULATORY ELEMENT-BINDING PROTEIN							GO:0046983
QTL_Mg_10_31481349			Phvul.010G070700	Chr10	31514743	31515505	1
QTL_Mo_10_31648813			Phvul.010G070800	Chr10	31587188	31588853	1	PTHR15615:SF15 - CYCLIN-U2-1-RELATED	PF00134	Cyclin, N-terminal domain	PTHR15615	UNCHARACTERIZED	KOG1674	Cyclin
QTL_Mo_10_31648813	QTL_Mo_10_31724718		Phvul.010G070900	Chr10	31667642	31670150	1	PTHR31692:SF3 - BETA EXPANSIN 6-RELATED	PF03330	Rare lipoprotein A (RlpA)-like double-psi beta-barrel	PTHR31692	FAMILY NOT NAMED
QTL_Mo_10_31648813	QTL_Mo_10_31724718		Phvul.010G071000	Chr10	31708481	31709705	1	PTHR31692:SF3 - BETA EXPANSIN 6-RELATED	PF03330	Rare lipoprotein A (RlpA)-like double-psi beta-barrel	PTHR31692	FAMILY NOT NAMED
QTL_Mo_10_31876693			Phvul.010G071100	Chr10	31841020	31842480	-1	PF13912 - C2H2-type zinc finger (zf-C2H2_6) (1 of 42)	PF13912	C2H2-type zinc finger	PTHR26374	FAMILY NOT NAMED
QTL_Mo_10_31876693			Phvul.010G071200	Chr10	31852334	31854555	1	PF00076//PF14111 - RNA recognition motif. (a.k.a. RRM, RBD, or RNP domain) (RRM_1) // Domain of unknown function (DUF4283) (DUF4283) (1 of 38)	PF00076	RNA recognition motif. (a.k.a. RRM, RBD, or RNP domain)	PTHR24012	FAMILY NOT NAMED							GO:0003676
QTL_Mo_10_31876693			Phvul.010G071300	Chr10	31949277	31951593	1	PTHR26374:SF175 - C2H2-LIKE ZINC FINGER PROTEIN-RELATED	PF13912	C2H2-type zinc finger	PTHR26374	FAMILY NOT NAMED
QTL_Mo_10_32090665			Phvul.010G071600	Chr10	32084775	32088147	1	PTHR33317:SF2 - HOLLIDAY JUNCTION RESOLVASE-RELATED	PF03652	Uncharacterised protein family (UPF0081)	PTHR33317						K07447	putative holliday junction resolvase [EC:3.1.-.-]	GO:0006310
QTL_Mo_10_32090665	QTL_Mo_10_32099819		Phvul.010G071700	Chr10	32116935	32119580	1
QTL_Mo_10_32090665	QTL_Mo_10_32099819		Phvul.010G071766	Chr10	32132142	32138589	-1	PTHR23092:SF1 - NUCLEOTIDYLTRANSFERASE FAMILY PROTEIN	PF03828	Cid1 family poly A polymerase	PTHR23092	TOPOISOMERASE-RELATED PROTEIN			EC 2.7.7.19	Polynucleotide adenylyltransferase.			GO:0016779
QTL_Mo_10_32090665	QTL_Mo_10_32099819		Phvul.010G071832	Chr10	32139093	32143458	-1	PTHR23092:SF1 - NUCLEOTIDYLTRANSFERASE FAMILY PROTEIN			PTHR23092	TOPOISOMERASE-RELATED PROTEIN
QTL_Mo_10_32768914	QTL_Mn_10_32828781		Phvul.010G066600	Chr10	32855403	32858089	1	1.11.1.7 - Peroxidase / Lactoperoxidase (1 of 96)	PF00141	Peroxidase	PTHR31388	FAMILY NOT NAMED			EC 1.11.1.7	Peroxidase.	K00430	peroxidase [EC:1.11.1.7]	GO:0055114
	QTL_Mn_10_32828781		Phvul.010G085900	Chr10	32887143	32913394	1	K00142 - acyl-CoA synthetase [EC:6.2.1.-] (AASDH)	PF13193	AMP-binding enzyme C-terminal domain	PTHR24096	FAMILY NOT NAMED	KOG4649	PQQ (pyrrolo-quinoline quinone) repeat protein			K00142	acyl-CoA synthetase [EC:6.2.1.-]	GO:0008152
	QTL_Mn_10_32828781		Phvul.010G086000	Chr10	32914843	32918915	1		PF02441	Flavoprotein	PTHR14359	HOMO-OLIGOMERIC FLAVIN CONTAINING CYS DECARBOXYLASE FAMILY	KOG0672	Halotolerance protein HAL3 (contains flavoprotein domain)	EC 4.1.1.36	Phosphopantothenoylcysteine decarboxylase.	K01598	phosphopantothenoylcysteine decarboxylase [EC:4.1.1.36]	GO:0003824
QTL_Mo_10_33461608	QTL_Mo_10_33511552		Phvul.010G087300	Chr10	33419983	33422657	1		PF00389	D-isomer specific 2-hydroxyacid dehydrogenase, catalytic domain	PTHR10996	2-HYDROXYACID DEHYDROGENASE-RELATED	KOG0069	Glyoxylate/hydroxypyruvate reductase (D-isomer-specific 2-hydroxy acid dehydrogenase superfamily)	EC 1.1.1.79	Glyoxylate reductase (NADP(+)).			GO:0055114
QTL_Mo_10_33461608	QTL_Mo_10_33511552		Phvul.010G087401	Chr10	33432405	33433250	1	4.2.99.18 - DNA-(apurinic or apyrimidinic site) lyase / Phage-T4 UV endonuclease	PF03372	Endonuclease/Exonuclease/phosphatase family	PTHR31696	FAMILY NOT NAMED			EC 4.2.99.18	DNA-(apurinic or apyrimidinic site) lyase.
QTL_Mo_10_33461608	QTL_Mo_10_33511552	QTL_Mo_10_33552458	Phvul.010G087500	Chr10	33458358	33460539	-1	K05282 - gibberellin 20-oxidase (E1.14.11.12)	PF14226	non-haem dioxygenase in morphine synthesis N-terminal	PTHR10209	OXIDOREDUCTASE, 2OG-FE(II) OXYGENASE FAMILY PROTEIN	KOG0143	Iron/ascorbate family oxidoreductases			K05282	gibberellin 20-oxidase [EC:1.14.11.12]	GO:0055114
QTL_Mo_10_33461608	QTL_Mo_10_33511552	QTL_Mo_10_33552458	Phvul.010G087600	Chr10	33493179	33501898	-1	PTHR32116:SF4 - POLYGALACTURONATE 4-ALPHA-GALACTURONOSYLTRANSFERASE-RELATED	PF01501	Glycosyl transferase family 8	PTHR32116	FAMILY NOT NAMED			EC 2.4.1.43	Polygalacturonate 4-alpha-galacturonosyltransferase.	K13648	alpha-1,4-galacturonosyltransferase [EC:2.4.1.43]	GO:0016757
QTL_Mo_10_33461608	QTL_Mo_10_33511552	QTL_Mo_10_33552458	Phvul.010G087700	Chr10	33506406	33512183	-1		PF06487	Sin3 associated polypeptide p18 (SAP18)	PTHR13082	SAP18	KOG3391	Transcriptional co-repressor component			K14324	histone deacetylase complex subunit SAP18
QTL_Mo_10_33461608	QTL_Mo_10_33511552	QTL_Mo_10_33552458	Phvul.010G087800	Chr10	33539853	33545431	-1	PTHR23054:SF14 - PROTEIN Y45F10A.7, ISOFORM A	PF00462	Glutaredoxin	PTHR23054	UNCHARACTERIZED	KOG1752	Glutaredoxin and related proteins					GO:0045454
QTL_Mo_10_33671563	QTL_Mo_10_33511552	QTL_Mo_10_33552458	Phvul.010G087900	Chr10	33603691	33609900	1	PTHR11945:SF146 - AGAMOUS-LIKE MADS-BOX PROTEIN AGL13-RELATED	PF00319	SRF-type transcription factor (DNA-binding and dimerisation domain)	PTHR11945	MADS BOX PROTEIN	KOG0014	MADS box transcription factor			K09264	MADS-box transcription factor, plant	GO:0046983
QTL_Mo_10_33671563			Phvul.010G088050	Chr10	33660585	33685805	-1	PTHR11945//PTHR11945:SF222 - MADS BOX PROTEIN // SUBFAMILY NOT NAMED	PF01486	K-box region	PTHR11945	MADS BOX PROTEIN	KOG0014	MADS box transcription factor					GO:0006355
QTL_Mo_10_33837525			Phvul.010G088200	Chr10	33784293	33794256	-1	PTHR23063:SF9 - LYSOPHOSPHOLIPID ACYLTRANSFERASE LPEAT2	PF01553	Acyltransferase	PTHR23063	ACETYLTRANSFERASE-RELATED	KOG4666	Predicted phosphate acyltransferase, contains PlsC domain	EC 2.3.1.25	Plasmalogen synthase.	K13510	lysophosphatidylcholine acyltransferase / lyso-PAF acetyltransferase [EC:2.3.1.23 2.3.1.67]	GO:0016746
QTL_Mo_10_33837525			Phvul.010G088300	Chr10	33803626	33804632	1
QTL_Mo_10_33837525			Phvul.010G088400	Chr10	33810965	33816248	1		PF05922	Peptidase inhibitor I9	PTHR10795	PROPROTEIN CONVERTASE SUBTILISIN/KEXIN			EC 3.4.21.25	Cucumisin.			GO:0006508
QTL_Mo_10_33837525			Phvul.010G088500	Chr10	33820890	33823963	1		PF00954	S-locus glycoprotein family	PTHR27002		KOG1187	Serine/threonine protein kinase	EC 2.7.11.1	Non-specific serine/threonine protein kinase.			GO:0048544
QTL_Mo_10_33837525			Phvul.010G088600	Chr10	33837336	33840656	-1	PTHR27004:SF37 - DISEASE RESISTANCE FAMILY PROTEIN/LRR FAMILY PROTEIN-RELATED	PF08263	Leucine rich repeat N-terminal domain	PTHR27004		KOG0472	Leucine-rich repeat protein					GO:0005515
QTL_Mo_10_33837525			Phvul.010G088700	Chr10	33867648	33870624	1	PTHR10795:SF387 - SUBTILISIN-LIKE SERINE PROTEASE-RELATED	PF05922	Peptidase inhibitor I9	PTHR10795	PROPROTEIN CONVERTASE SUBTILISIN/KEXIN			EC 3.4.21.25	Cucumisin.			GO:0006508
QTL_Mo_10_33837525			Phvul.010G088800	Chr10	33895412	33896416	1	PTHR14155//PTHR14155:SF160 - RING FINGER DOMAIN-CONTAINING // SUBFAMILY NOT NAMED	PF13639	Ring finger domain	PTHR14155	RING FINGER DOMAIN-CONTAINING	KOG1493	Anaphase-promoting complex (APC), subunit 11					GO:0008270
QTL_Mo_10_33837525			Phvul.010G088850	Chr10	33900669	33904636	-1	PF00614//PF12357 - Phospholipase D Active site motif (PLDc) // Phospholipase D C terminal (PLD_C)	PF00614	Phospholipase D Active site motif	PTHR18896	PHOSPHOLIPASE D			EC 3.1.4.4	Phospholipase D.			GO:0003824
QTL_Mg_10_34496599			Phvul.010G090600	Chr10	34397290	34404670	1	K18726 - FAS-associated factor 2 (FAF2, UBXD8)	PF02809	Ubiquitin interaction motif	PTHR23322	FAS-ASSOCIATED PROTEIN					K18726	0	GO:0005515
QTL_Mg_10_34496599			Phvul.010G090700	Chr10	34411286	34412697	1
QTL_Mg_10_34496599			Phvul.010G090800	Chr10	34415400	34422124	-1	PTHR10108:SF841 - METHYLTRANSFERASE PMT15-RELATED	PF03141	Putative S-adenosyl-L-methionine-dependent methyltransferase	PTHR10108	METHYLTRANSFERASE							GO:0008168
QTL_Mg_10_34496599			Phvul.010G090900	Chr10	34438136	34439524	1	K11807 - WD and tetratricopeptide repeats protein 1 (WDTC1)			PTHR15574	WD REPEAT DOMAIN-CONTAINING FAMILY					K11807	WD and tetratricopeptide repeats protein 1
QTL_Mg_10_34496599			Phvul.010G091000	Chr10	34445035	34448035	1	PTHR31960:SF3 - F-BOX PROTEIN PP2-A13	PF14299	Phloem protein 2	PTHR31960	FAMILY NOT NAMED
QTL_Mg_10_34496599			Phvul.010G091100	Chr10	34475362	34492105	1	PTHR23155//PTHR23155:SF590 - LEUCINE-RICH REPEAT-CONTAINING PROTEIN // SUBFAMILY NOT NAMED	PF00931	NB-ARC domain	PTHR23155	LEUCINE-RICH REPEAT-CONTAINING PROTEIN	KOG4658	Apoptotic ATPase					GO:0043531
QTL_Mg_10_34496599			Phvul.010G091200	Chr10	34504191	34515966	-1	PTHR23155//PTHR23155:SF590 - LEUCINE-RICH REPEAT-CONTAINING PROTEIN // SUBFAMILY NOT NAMED	PF00931	NB-ARC domain	PTHR23155	LEUCINE-RICH REPEAT-CONTAINING PROTEIN	KOG4658	Apoptotic ATPase					GO:0043531
QTL_Mg_10_34496599			Phvul.010G091300	Chr10	34537336	34537968	-1	K01025 - uncharacterized protein (E2.8.2.-)	PF00685	Sulfotransferase domain	PTHR11783	SULFOTRANSFERASE (SULT)					K01025	[heparan sulfate]-glucosamine 3-sulfotransferase 1 [EC:2.8.2.23]	GO:0008146
QTL_Mn_11_5168818			Phvul.011G057400	Chr11	5078443	5082578	-1	PF00010 - Helix-loop-helix DNA-binding domain (HLH) (1 of 158)	PF00010	Helix-loop-helix DNA-binding domain	PTHR16223	FAMILY NOT NAMED							GO:0046983
QTL_Mn_11_5168818	QTL_Mn_11_5199874		Phvul.011G057600	Chr11	5112228	5113454	1	PTHR27000:SF151 - DNA-DAMAGE-REPAIR/TOLERATION PROTEIN DRT100-RELATED	PF08263	Leucine rich repeat N-terminal domain	PTHR27000		KOG4579	Leucine-rich repeat (LRR) protein associated with apoptosis in muscle tissue	EC 3.5.1.98	Histone deacetylase.			GO:0005515
QTL_Mn_11_5168818	QTL_Mn_11_5199874		Phvul.011G057700	Chr11	5116331	5122758	-1		PF07944	Putative glycosyl hydrolase of unknown function (DUF1680)	PTHR31151	FAMILY NOT NAMED					K09955	hypothetical protein
QTL_Mn_11_5168818	QTL_Mn_11_5199874		Phvul.011G057800	Chr11	5126661	5133346	-1	3.2.1.185 - Non-reducing end beta-L-arabinofuranosidase	PF07944	Putative glycosyl hydrolase of unknown function (DUF1680)	PTHR31151	FAMILY NOT NAMED			EC 3.2.1.185	Non-reducing end beta-L-arabinofuranosidase.	K09955	hypothetical protein
QTL_Mn_11_5168818	QTL_Mn_11_5199874		Phvul.011G057900	Chr11	5152180	5153445	-1	PTHR24351:SF107 - AGC (CAMP-DEPENDENT, CGMP-DEPENDENT AND PROTEIN KINASE C) KINASE FAMILY PROTEIN	PF07714	Protein tyrosine kinase	PTHR24351	RIBOSOMAL PROTEIN S6 KINASE	KOG0610	Putative serine/threonine protein kinase	EC 2.7.11.1	Non-specific serine/threonine protein kinase.			GO:0006468
QTL_Mn_11_5168818	QTL_Mn_11_5199874		Phvul.011G058000	Chr11	5175398	5178614	1	PTHR32467:SF12 - AP2-LIKE ETHYLENE-RESPONSIVE TRANSCRIPTION FACTOR PLT2	PF00847	AP2 domain	PTHR32467	FAMILY NOT NAMED					K09285	AP2-like factor, ANT lineage	GO:0006355
QTL_Mn_11_5168818	QTL_Mn_11_5199874		Phvul.011G058100	Chr11	5183094	5185016	-1	PTHR10634//PTHR10634:SF32 - AN1-TYPE ZINC FINGER PROTEIN // SUBFAMILY NOT NAMED	PF01428	AN1-like Zinc finger	PTHR10634	AN1-TYPE ZINC FINGER PROTEIN	KOG3173	Predicted Zn-finger protein					GO:0008270
QTL_Mn_11_5168818	QTL_Mn_11_5199874		Phvul.011G058200	Chr11	5201053	5201588	1				PTHR33659
QTL_Mn_11_5168818	QTL_Mn_11_5199874		Phvul.011G058300	Chr11	5214083	5218324	1	PTHR13593:SF52 - F14J22.5 PROTEIN-RELATED			PTHR13593	UNCHARACTERIZED
QTL_Mn_11_5168818	QTL_Mn_11_5199874		Phvul.011G058400	Chr11	5220948	5221990	-1	PF03100 - CcmE (CcmE)	PF03100	CcmE	PTHR34128								GO:0017004
QTL_Mn_11_5168818	QTL_Mn_11_5199874		Phvul.011G058500	Chr11	5228604	5232591	1	K07238 - zinc transporter, ZIP family (TC.ZIP, zupT, ZRT3, ZIP2)	PF02535	ZIP Zinc transporter	PTHR11040	ZINC/IRON TRANSPORTER	KOG2474	Zinc transporter and related ZIP domain-containing proteins			K07238	zinc transporter, ZIP family	GO:0055085
QTL_Mn_11_5168818	QTL_Mn_11_5199874		Phvul.011G058600	Chr11	5239911	5242356	-1	PTHR10593//PTHR10593:SF27 - SERINE/THREONINE-PROTEIN KINASE RIO // SUBFAMILY NOT NAMED			PTHR10593	SERINE/THREONINE-PROTEIN KINASE RIO
QTL_Mn_11_5168818	QTL_Mn_11_5199874		Phvul.011G058700	Chr11	5243892	5246655	1				PTHR12758	APOPTOSIS INHIBITOR 5-RELATED
QTL_Mn_11_5168818	QTL_Mn_11_5199874		Phvul.011G058800	Chr11	5255869	5260614	1	PTHR14155:SF75 - E3 UBIQUITIN LIGASE BIG BROTHER	PF13639	Ring finger domain	PTHR14155	RING FINGER DOMAIN-CONTAINING					K19045	0	GO:0008270
QTL_Mn_11_5168818	QTL_Mn_11_5199874		Phvul.011G058900	Chr11	5268122	5269095	1
	QTL_Mn_11_5199874		Phvul.011G059000	Chr11	5277164	5278560	1
	QTL_Mn_11_5199874		Phvul.011G059100	Chr11	5294897	5295211	1
QTL_Ca_11_6191264			Phvul.011G068600	Chr11	6095084	6097402	-1
QTL_Ca_11_6191264			Phvul.011G068700	Chr11	6106515	6108448	-1	PTHR22814//PTHR22814:SF82 - COPPER TRANSPORT PROTEIN ATOX1-RELATED // SUBFAMILY NOT NAMED	PF00403	Heavy-metal-associated domain	PTHR22814	COPPER TRANSPORT PROTEIN ATOX1-RELATED	KOG1603	Copper chaperone					GO:0046872
QTL_Ca_11_6191264			Phvul.011G068800	Chr11	6127076	6129447	1	PTHR12542//PTHR12542:SF17 - EXOCYST COMPLEX PROTEIN EXO70 // SUBFAMILY NOT NAMED	PF03081	Exo70 exocyst complex subunit	PTHR12542	EXOCYST COMPLEX PROTEIN EXO70							GO:0006887
QTL_Ca_11_6191264			Phvul.011G068900	Chr11	6160872	6162607	1	PTHR31561:SF24 - 3-KETOACYL-COA SYNTHASE 12-RELATED	PF08541	3-Oxoacyl-[acyl-carrier-protein (ACP)] synthase III C terminal	PTHR31561	FAMILY NOT NAMED			EC 2.3.1.199	Very-long-chain 3-oxoacyl-CoA synthase.	K15397	0	GO:0016747
QTL_Ca_11_6191264			Phvul.011G069000	Chr11	6176293	6179364	-1	PF01535//PF13041 - PPR repeat (PPR) // PPR repeat family (PPR_2) (1 of 197)	PF01535	PPR repeat	PTHR24015	FAMILY NOT NAMED
QTL_Ca_11_6191264			Phvul.011G069100	Chr11	6179365	6185247	1	PTHR31835:SF1 - NUCLEOSIDE DIPHOSPHATE-LINKED MOIETY X MOTIF 22	PF00293	NUDIX domain	PTHR31835	FAMILY NOT NAMED							GO:0016787
QTL_Ca_11_6191264			Phvul.011G069200	Chr11	6198662	6202412	1	KOG0508//KOG4412 - Ankyrin repeat protein // 26S proteasome regulatory complex, subunit PSMD10	PF13962	Domain of unknown function	PTHR24186	FAMILY NOT NAMED	KOG4412	26S proteasome regulatory complex, subunit PSMD10
QTL_Ca_11_6191264			Phvul.011G069300	Chr11	6204757	6214113	1	PTHR31057:SF0 - E3 UFM1-PROTEIN LIGASE 1	PF09743	Uncharacterized conserved protein (DUF2042)	PTHR31057	FAMILY NOT NAMED
QTL_Ca_11_6191264			Phvul.011G069400	Chr11	6215803	6226030	-1		PF04153	NOT2 / NOT3 / NOT5 family	PTHR23326	CCR4 NOT-RELATED					K12605	CCR4-NOT transcription complex subunit 2	GO:0006355
QTL_Ca_11_6191264			Phvul.011G069501	Chr11	6232076	6232960	-1	K11254 - histone H4 (H4)	PF15511	Centromere kinetochore component CENP-T	PTHR10484	HISTONE H4	KOG3467	Histone H4			K11254	histone H4
QTL_Ca_11_6191264			Phvul.011G069600	Chr11	6245579	6249162	1	PTHR27003:SF94 - RECEPTOR-LIKE PROTEIN KINASE HERK 1	PF11721	Di-glucose binding within endoplasmic reticulum	PTHR27003		KOG1187	Serine/threonine protein kinase	EC 2.7.11.1	Non-specific serine/threonine protein kinase.			GO:0006468
QTL_Ca_11_6191264			Phvul.011G069700	Chr11	6249518	6250295	-1	K11254 - histone H4 (H4)	PF15511	Centromere kinetochore component CENP-T	PTHR10484	HISTONE H4	KOG3467	Histone H4			K11254	histone H4
QTL_Ca_11_6191264			Phvul.011G069800	Chr11	6256811	6259382	-1	PTHR31319:SF1 - CCT MOTIF FAMILY PROTEIN	PF06203	CCT motif	PTHR31319	FAMILY NOT NAMED							GO:0005515
QTL_Ca_11_6191264			Phvul.011G069900	Chr11	6279845	6280765	-1	PTHR11177//PTHR11177:SF186 - CHITINASE // SUBFAMILY NOT NAMED	PF00704	Glycosyl hydrolases family 18	PTHR11177	CHITINASE			EC 3.2.1.14	Chitinase.			GO:0005975
QTL_Ca_11_6191264			Phvul.011G070000	Chr11	6284527	6290711	1	PTHR24115:SF515 - KINESIN MOTOR PROTEIN-RELATED PROTEIN-RELATED	PF00225	Kinesin motor domain	PTHR24115	FAMILY NOT NAMED			EC 3.6.4.4	Plus-end-directed kinesin ATPase.	K10398	kinesin family member 11	GO:0008017
QTL_Zn_11_7315158			Phvul.011G078800	Chr11	7222719	7225720	1		PF01300	Telomere recombination	PTHR17490	SUA5	KOG3051	RNA binding/translational regulation protein of the SUA5 family					GO:0003725
QTL_Zn_11_7315158			Phvul.011G078900	Chr11	7231464	7232495	-1
QTL_Zn_11_7315158	QTL_Zn_11_7334690		Phvul.011G079000	Chr11	7237477	7241462	-1	PTHR18929:SF74 - PROTEIN DISULFIDE-ISOMERASE A3	PF13899	Thioredoxin-like	PTHR18929	PROTEIN DISULFIDE ISOMERASE	KOG0190	Protein disulfide isomerase (prolyl 4-hydroxylase beta subunit)	EC 5.3.4.1	Protein disulfide-isomerase.	K09580	protein disulfide-isomerase A1 [EC:5.3.4.1]	GO:0045454
QTL_Zn_11_7315158	QTL_Zn_11_7334690	QTL_Zn_11_7346014	Phvul.011G079100	Chr11	7251271	7252900	1				PTHR37720
QTL_Zn_11_7315158	QTL_Zn_11_7334690	QTL_Zn_11_7346014	Phvul.011G079200	Chr11	7253698	7254337	-1				PTHR35718
QTL_Zn_11_7315158	QTL_Zn_11_7334690	QTL_Zn_11_7346014	Phvul.011G079300	Chr11	7259754	7261604	-1	PTHR19139:SF158 - AQUAPORIN PIP2-4-RELATED	PF00230	Major intrinsic protein	PTHR19139	AQUAPORIN TRANSPORTER	KOG0223	Aquaporin (major intrinsic protein family)			K09872	aquaporin PIP	GO:0016020
QTL_Zn_11_7315158	QTL_Zn_11_7334690	QTL_Zn_11_7346014	Phvul.011G079400	Chr11	7273613	7274509	-1	K02870 - large subunit ribosomal protein L12e (RP-L12e, RPL12)	PF00298	Ribosomal protein L11, RNA binding domain	PTHR11661	60S RIBOSOMAL PROTEIN L12	KOG0886	40S ribosomal protein S2			K02870	large subunit ribosomal protein L12e	GO:0006412
QTL_Zn_11_7315158	QTL_Zn_11_7334690	QTL_Zn_11_7346014	Phvul.011G079500	Chr11	7285142	7286383	1	PTHR33083:SF9 - EMB	PF04520	Senescence regulator	PTHR33083
QTL_Zn_11_7315158	QTL_Zn_11_7334690	QTL_Zn_11_7346014	Phvul.011G079600	Chr11	7293860	7300523	1	PTHR13027 - SAND PROTEIN-RELATED	PF03164	Trafficking protein Mon1	PTHR13027	SAND PROTEIN-RELATED	KOG0997	Uncharacterized conserved protein Sand
QTL_Zn_11_7315158	QTL_Zn_11_7334690	QTL_Zn_11_7346014	Phvul.011G079700	Chr11	7303554	7307348	1	PTHR10910//PTHR10910:SF94 - EUKARYOTE SPECIFIC DSRNA BINDING PROTEIN // SUBFAMILY NOT NAMED	PF00035	Double-stranded RNA binding motif	PTHR10910	EUKARYOTE SPECIFIC DSRNA BINDING PROTEIN
QTL_Zn_11_7315158	QTL_Zn_11_7334690	QTL_Zn_11_7346014	Phvul.011G079800	Chr11	7328811	7335272	1	PF08670 - MEKHLA domain (MEKHLA)	PF00046	Homeobox domain	PTHR24326	FAMILY NOT NAMED					K09338	homeobox-leucine zipper protein	GO:0003677
QTL_Zn_11_7315158	QTL_Zn_11_7334690	QTL_Zn_11_7346014	Phvul.011G079900	Chr11	7336677	7342409	1	K05290 - phosphatidylinositol glycan, class K (PIGK)	PF01650	Peptidase C13 family	PTHR12000	HEMOGLOBINASE FAMILY MEMBER	KOG1349	Gpi-anchor transamidase	EC 3.4.22.34	Legumain.	K05290	phosphatidylinositol glycan, class K [EC:2.6.-.-]	GO:0008233
QTL_Zn_11_7315158	QTL_Zn_11_7334690	QTL_Zn_11_7346014	Phvul.011G080000	Chr11	7357443	7368940	1	K15501 - serine/threonine-protein phosphatase 6 regulatory subunit 3 (PPP6R3, SAPS3)	PF04499	SIT4 phosphatase-associated protein	PTHR12634	SIT4(YEAST)-ASSOCIATING PROTEIN-RELATED					K15501	0
QTL_Zn_11_7315158	QTL_Zn_11_7334690	QTL_Zn_11_7346014	Phvul.011G080100	Chr11	7378711	7382375	-1	PTHR31384:SF27 - AUXIN RESPONSE FACTOR 10-RELATED	PF02362	B3 DNA binding domain	PTHR31384	FAMILY NOT NAMED							GO:0003677
QTL_Zn_11_7315158	QTL_Zn_11_7334690	QTL_Zn_11_7346014	Phvul.011G080200	Chr11	7411249	7418979	-1	PTHR10071:SF184 - GATA TRANSCRIPTION FACTOR 10-RELATED	PF00320	GATA zinc finger	PTHR10071	TRANSCRIPTION FACTOR GATA (GATA BINDING FACTOR)							GO:0043565
	QTL_Zn_11_7334690	QTL_Zn_11_7346014	Phvul.011G080300	Chr11	7419997	7424662	-1	2.8.2.20 - Protein-tyrosine sulfotransferase / Tyrosylprotein sulfotransferase			PTHR12812	HEPARAN SULFATE 6-O-SULFOTRANSFERASE 3			EC 2.8.2.20	Protein-tyrosine sulfotransferase.			GO:0016021
	QTL_Zn_11_7334690	QTL_Zn_11_7346014	Phvul.011G080400	Chr11	7433489	7442377	-1	K16329 - pseudouridine-5'-phosphate glycosidase (psuG)	PF04227	Indigoidine synthase A like protein	PTHR10584	SUGAR KINASE					K16329	0	GO:0016798
		QTL_Zn_11_7346014	Phvul.011G080500	Chr11	7445062	7449195	-1	PTHR33604:SF2 - GLYCOSYLTRANSFERASE FAMILY PROTEIN 2			PTHR33604
		QTL_Zn_11_7346014	Phvul.011G080600	Chr11	7454110	7458633	-1	PTHR31223:SF17 - CYTOKININ RIBOSIDE 5'-MONOPHOSPHATE PHOSPHORIBOHYDROLASE LOG3-RELATED	PF03641	Possible lysine decarboxylase	PTHR31223	FAMILY NOT NAMED					K06966	protein pelota
QTL_Mo_11_7595234			Phvul.011G080700	Chr11	7476784	7477335	1
QTL_Mo_11_7595234			Phvul.011G080800	Chr11	7483068	7487580	-1	PTHR10217:SF538 - CYCLIC NUCLEOTIDE-GATED ION CHANNEL 15-RELATED	PF00520	Ion transport protein	PTHR10217	VOLTAGE AND LIGAND GATED POTASSIUM CHANNEL					K05391	cyclic nucleotide gated channel, other eukaryote	GO:0055085
QTL_Mo_11_7595234			Phvul.011G080850	Chr11	7495308	7498308	1		PF00111	2Fe-2S iron-sulfur cluster binding domain	PTHR23426	FERREDOXIN/ADRENODOXIN	KOG3309	Ferredoxin	EC 2.8.1.6	Biotin synthase.			GO:0051536
QTL_Mo_11_7595234			Phvul.011G080900	Chr11	7499547	7504357	-1	K12587 - exosome complex component MTR3 (MTR3, EXOSC6)	PF03725	3' exoribonuclease family, domain 2	PTHR11953	RIBONUCLEASE PH RELATED	KOG1068	Exosomal 3'-5' exoribonuclease complex, subunit Rrp41 and related exoribonucleases			K12587	exosome complex component MTR3, animal type
QTL_Mo_11_7595234			Phvul.011G081000	Chr11	7503159	7503639	1
QTL_Mo_11_7595234			Phvul.011G081100	Chr11	7505532	7506986	-1	PTHR12411//PTHR12411:SF376 - CYSTEINE PROTEASE FAMILY C1-RELATED // SUBFAMILY NOT NAMED	PF08246	Cathepsin propeptide inhibitor domain (I29)	PTHR12411	CYSTEINE PROTEASE FAMILY C1-RELATED	KOG1543	Cysteine proteinase Cathepsin L	EC 3.4.22.33	Fruit bromelain.			GO:0008234
QTL_Mo_11_7595234			Phvul.011G081200	Chr11	7517390	7523627	-1	PTHR27001:SF78 - RECEPTOR-LIKE SERINE/THREONINE-PROTEIN KINASE NCRK	PF00069	Protein kinase domain	PTHR27001		KOG1187	Serine/threonine protein kinase	EC 2.7.11.1	Non-specific serine/threonine protein kinase.			GO:0006468
QTL_Mo_11_7595234			Phvul.011G081250	Chr11	7526302	7531699	-1	PTHR10579:SF61 - C3H4 TYPE ZINC FINGER PROTEIN-RELATED	PF17123		PTHR10579	CALCIUM-ACTIVATED CHLORIDE CHANNEL REGULATOR	KOG1493	Anaphase-promoting complex (APC), subunit 11
QTL_Mo_11_7595234			Phvul.011G081300	Chr11	7553418	7553958	1
QTL_Mo_11_7595234			Phvul.011G081400	Chr11	7557751	7557918	1	K02992 - small subunit ribosomal protein S7 (RP-S7, MRPS7, rpsG)	PF00177	Ribosomal protein S7p/S5e	PTHR11205	RIBOSOMAL PROTEIN S7					K02992	small subunit ribosomal protein S7	GO:0006412
QTL_Mo_11_7595234			Phvul.011G081500	Chr11	7566948	7568021	1
QTL_Mo_11_7595234			Phvul.011G081600	Chr11	7594372	7594784	1
QTL_Mo_11_7595234			Phvul.011G081700	Chr11	7603587	7613411	-1	PTHR35116:SF2 - ATP-DEPENDENT HELICASE-LIKE PROTEIN			PTHR35116
QTL_Mo_11_7595234			Phvul.011G081800	Chr11	7624866	7626883	1	2.7.11.1 - Non-specific serine/threonine protein kinase / Threonine-specific protein kinase (1 of 1198)	PF07714	Protein tyrosine kinase	PTHR27001		KOG1187	Serine/threonine protein kinase	EC 2.7.11.1	Non-specific serine/threonine protein kinase.			GO:0006468
QTL_Mo_11_7595234			Phvul.011G081900	Chr11	7628336	7630527	-1	PTHR18952:SF111 - ALPHA CARBONIC ANHYDRASE 3	PF00194	Eukaryotic-type carbonic anhydrase	PTHR18952	CARBONIC ANHYDRASE	KOG0382	Carbonic anhydrase	EC 4.2.1.1	Carbonate dehydratase.	K01674	carbonic anhydrase [EC:4.2.1.1]
QTL_Mo_11_7595234			Phvul.011G082000	Chr11	7643891	7644853	1
QTL_Mo_11_7595234			Phvul.011G082100	Chr11	7648819	7649602	1
QTL_Mo_11_7595234			Phvul.011G082200	Chr11	7654973	7661970	-1		PF05920	Homeobox KN domain	PTHR11850	HOMEOBOX PROTEIN TRANSCRIPTION FACTORS	KOG0773	Transcription factor MEIS1 and related HOX domain proteins					GO:0006355
QTL_Mo_11_7595234			Phvul.011G082300	Chr11	7681466	7686818	-1	PF04784//PF14389 - Protein of unknown function, DUF547 (DUF547) // Leucine-zipper of ternary complex factor MIP1 (Lzipper-MIP1)	PF14389	Leucine-zipper of ternary complex factor MIP1	PTHR23054	UNCHARACTERIZED
QTL_Mo_11_8815634			Phvul.011G089900	Chr11	8741845	8748047	1	PTHR32044:SF17 - GLUCOMANNAN 4-BETA-MANNOSYLTRANSFERASE 2	PF13632	Glycosyl transferase family group 2	PTHR32044	FAMILY NOT NAMED			EC 2.4.1.32	Glucomannan 4-beta-mannosyltransferase.	K13680	beta-mannan synthase [EC:2.4.1.32]
QTL_Mo_11_8815634			Phvul.011G090000	Chr11	8753173	8755915	-1	K11276 - nucleophosmin 1 (NPM1)			PTHR31802	FAMILY NOT NAMED			EC 3.5.1.98	Histone deacetylase.	K11276	nucleophosmin 1
QTL_Mo_11_8815634			Phvul.011G090100	Chr11	8773415	8775648	-1				PTHR33270
QTL_Mo_11_8815634			Phvul.011G090200	Chr11	8798336	8800112	-1								EC 2.1.1.43	Histone-lysine N-methyltransferase.
QTL_Mo_11_8815634			Phvul.011G090300	Chr11	8843404	8846855	-1	PF13041//PF13812 - PPR repeat family (PPR_2) // Pentatricopeptide repeat domain (PPR_3)	PF13812	Pentatricopeptide repeat domain	PTHR24015	FAMILY NOT NAMED
QTL_Mo_11_8815634			Phvul.011G090400	Chr11	8857012	8858286	-1	PTHR21022//PTHR21022:SF5 - PREPHENATE DEHYDRATASE P PROTEIN // SUBFAMILY NOT NAMED	PF00800	Prephenate dehydratase	PTHR21022	PREPHENATE DEHYDRATASE (P PROTEIN)			EC 4.2.1.91	Arogenate dehydratase.	K05359	carboxycyclohexadienyl dehydratase [EC:4.2.1.91]	GO:0009094
QTL_Mo_11_8815634			Phvul.011G090500	Chr11	8874717	8885078	-1	PTHR11119:SF28 - NUCLEOBASE-ASCORBATE TRANSPORTER 12	PF00860	Permease family	PTHR11119	XANTHINE-URACIL / VITAMIN C PERMEASE FAMILY MEMBER					K14611	0	GO:0055085
QTL_Mo_11_8815634			Phvul.011G090600	Chr11	8900640	8906043	1	3.1.3.63 - 2-carboxy-D-arabinitol-1-phosphatase	PF00300	Histidine phosphatase superfamily (branch 1)	PTHR23029	PHOSPHOGLYCERATE MUTASE	KOG0235	Phosphoglycerate mutase	EC 3.1.3.63	2-carboxy-D-arabinitol-1-phosphatase.	K15634	0
QTL_Mo_11_10155319			Phvul.011G097900	Chr11	10076485	10077616	-1	PTHR31415:SF2 - LATE EMBRYOGENESIS ABUNDANT HYDROXYPROLINE-RICH GLYCOPROTEIN-RELATED	PF03168	Late embryogenesis abundant protein	PTHR31415	FAMILY NOT NAMED
QTL_Mo_11_10155319			Phvul.011G097950	Chr11	10096438	10097097	1
QTL_Mo_11_10155319			Phvul.011G098000	Chr11	10097532	10105159	-1	PF00652 - Ricin-type beta-trefoil lectin domain (Ricin_B_lectin)	PF00652	Ricin-type beta-trefoil lectin domain	PTHR31263	FAMILY NOT NAMED			EC 3.2.1.4	Cellulase.			GO:0005975
QTL_Mo_11_10155319	QTL_Mo_11_10212465		Phvul.011G098100	Chr11	10127859	10128840	-1				PTHR31852	FAMILY NOT NAMED
QTL_Mo_11_10155319	QTL_Mo_11_10212465		Phvul.011G098200	Chr11	10129401	10136290	-1		PF00069	Protein kinase domain	PTHR24362	SERINE/THREONINE-PROTEIN KINASE NEK	KOG0198	MEKK and related serine/threonine protein kinases	EC 2.7.11.1	Non-specific serine/threonine protein kinase.			GO:0006468
QTL_Mo_11_10155319	QTL_Mo_11_10212465		Phvul.011G098300	Chr11	10161483	10164186	1	PTHR22912:SF180 - 3-PHENYLPROPIONATE/CINNAMIC ACID DIOXYGENASE FERREDOXIN--NAD(+) REDUCTASE COMPONENT	PF00070	Pyridine nucleotide-disulphide oxidoreductase	PTHR22912	DISULFIDE OXIDOREDUCTASE	KOG2495	NADH-dehydrogenase (ubiquinone)	EC 1.6.5.9	NADH:ubiquinone reductase (non-electrogenic).			GO:0055114
QTL_Mo_11_10155319	QTL_Mo_11_10212465		Phvul.011G098400	Chr11	10183422	10188359	1	PTHR22912:SF180 - 3-PHENYLPROPIONATE/CINNAMIC ACID DIOXYGENASE FERREDOXIN--NAD(+) REDUCTASE COMPONENT	PF00070	Pyridine nucleotide-disulphide oxidoreductase	PTHR22912	DISULFIDE OXIDOREDUCTASE	KOG2495	NADH-dehydrogenase (ubiquinone)	EC 1.6.5.9	NADH:ubiquinone reductase (non-electrogenic).			GO:0055114
QTL_Mo_11_10155319	QTL_Mo_11_10212465		Phvul.011G098500	Chr11	10190307	10193379	1	1.6.5.9 - NADH:ubiquinone reductase (non-electrogenic) / Ubiquinone reductase	PF00070	Pyridine nucleotide-disulphide oxidoreductase	PTHR22912	DISULFIDE OXIDOREDUCTASE	KOG2495	NADH-dehydrogenase (ubiquinone)	EC 1.6.5.9	NADH:ubiquinone reductase (non-electrogenic).			GO:0055114
QTL_Mo_11_10155319	QTL_Mo_11_10212465		Phvul.011G098800	Chr11	10254133	10256987	-1	PTHR31086:SF22 - ALUMINUM-ACTIVATED MALATE TRANSPORTER 1-RELATED	PF11744	Aluminium activated malate transporter	PTHR31086	FAMILY NOT NAMED	KOG4711	Predicted membrane protein					GO:0015743
	QTL_Mo_11_10212465		Phvul.011G098900	Chr11	10294360	10301023	-1	PTHR13902:SF66 - TRANSCRIPTION FACTOR LHW	PF14215	bHLH-MYC and R2R3-MYB transcription factors N-terminal	PTHR13902	SERINE/THREONINE-PROTEIN KINASE WNK (WITH NO LYSINE)-RELATED
	QTL_Mo_11_10212465		Phvul.011G099000	Chr11	10300468	10300578	-1
QTL_Mo_11_10700430			Phvul.011G099600	Chr11	10610367	10629849	-1	PTHR11668//PTHR11668:SF243 - SERINE/THREONINE PROTEIN PHOSPHATASE // SUBFAMILY NOT NAMED	PF07646	Kelch motif	PTHR11668	SERINE/THREONINE PROTEIN PHOSPHATASE	KOG0374	Serine/threonine specific protein phosphatase PP1, catalytic subunit	EC 3.1.3.16	Phosphoprotein phosphatase.			GO:0005515
QTL_Mo_11_10700430			Phvul.011G099700	Chr11	10634813	10638671	-1	K14539 - large subunit GTPase 1 (LSG1)	PF01926	50S ribosome-binding GTPase	PTHR11089	GTP-BINDING PROTEIN-RELATED					K14539	large subunit GTPase 1 [EC:3.6.1.-]	GO:0005525
QTL_Mo_11_10700430			Phvul.011G099900	Chr11	10672261	10675504	-1				PTHR21454	FAMILY NOT NAMED
QTL_Mo_11_10700430			Phvul.011G100000	Chr11	10681822	10684730	1	K09503 - DnaJ homolog subfamily A member 2 (DNAJA2)	PF00684	DnaJ central domain	PTHR24078	DNAJ HOMOLOG SUBFAMILY C MEMBER	KOG0712	Molecular chaperone (DnaJ superfamily)			K09503	DnaJ homolog subfamily A member 2	GO:0051082
QTL_Mo_11_10700430			Phvul.011G100100	Chr11	10688924	10693229	1	PTHR11306//PTHR11306:SF13 - NIEMANN PICK TYPE C2 PROTEIN NPC2-RELATED // SUBFAMILY NOT NAMED	PF02221	ML domain	PTHR11306	NIEMANN PICK TYPE C2 PROTEIN NPC2-RELATED	KOG4680	Uncharacterized conserved protein, contains ML domain
QTL_Mo_11_10700430			Phvul.011G100200	Chr11	10696294	10702007	1				PTHR34210
QTL_Mo_11_10700430			Phvul.011G100300	Chr11	10729512	10736267	-1	PTHR31675:SF2 - AXIAL REGULATOR YABBY 2-RELATED	PF04690	YABBY protein	PTHR31675	FAMILY NOT NAMED							GO:0007275
QTL_Mo_11_10700430			Phvul.011G100400	Chr11	10792608	10796881	1	PTHR10426:SF24 - CALCIUM-DEPENDENT PHOSPHOTRIESTERASE SUPERFAMILY PROTEIN-RELATED	PF03088	Strictosidine synthase	PTHR10426	STRICTOSIDINE SYNTHASE-RELATED	KOG1520	Predicted alkaloid synthase/Surface mucin Hemomucin	EC 4.3.3.2	Strictosidine synthase.			GO:0016844
QTL_Mo_11_10700430			Phvul.011G100500	Chr11	10797812	10808951	1	K10754 - replication factor C subunit 1 (RFC1)	PF00004	ATPase family associated with various cellular activities (AAA)	PTHR23389	CHROMOSOME TRANSMISSION FIDELITY FACTOR 18	KOG1968	Replication factor C, subunit RFC1 (large subunit)			K10754	replication factor C subunit 1	GO:0005524
QTL_Mo_11_10908469			Phvul.011G100600	Chr11	10810457	10814039	-1	PTHR32499:SF3 - FASCICLIN-LIKE ARABINOGALACTAN PROTEIN 15-RELATED	PF02469	Fasciclin domain	PTHR32499	FAMILY NOT NAMED
QTL_Mo_11_10908469			Phvul.011G100700	Chr11	10822700	10825926	1
QTL_Mo_11_10908469			Phvul.011G100800	Chr11	10837054	10838433	1	PTHR23024//PTHR23024:SF189 - MEMBER OF 'GDXG' FAMILY OF LIPOLYTIC ENZYMES // SUBFAMILY NOT NAMED	PF12695	Alpha/beta hydrolase family	PTHR23024	MEMBER OF 'GDXG' FAMILY OF LIPOLYTIC ENZYMES	KOG1515	Arylacetamide deacetylase	EC 3.1.1.1	Carboxylesterase.
QTL_Mo_11_10908469			Phvul.011G100900	Chr11	10840593	10842061	1	PTHR23024//PTHR23024:SF189 - MEMBER OF 'GDXG' FAMILY OF LIPOLYTIC ENZYMES // SUBFAMILY NOT NAMED	PF12695	Alpha/beta hydrolase family	PTHR23024	MEMBER OF 'GDXG' FAMILY OF LIPOLYTIC ENZYMES	KOG1515	Arylacetamide deacetylase	EC 3.1.1.1	Carboxylesterase.
QTL_Mo_11_10908469			Phvul.011G101000	Chr11	10859544	10860740	-1	PTHR33264:SF5 - EXPRESSED PROTEIN-RELATED			PTHR33264
QTL_Mo_11_10908469			Phvul.011G101100	Chr11	10868819	10874368	-1	PTHR10516:SF322 - OUTER ENVELOPE PROTEIN 61, CHLOROPLASTIC	PF00515	Tetratricopeptide repeat	PTHR10516	PEPTIDYL-PROLYL CIS-TRANS ISOMERASE			EC 5.2.1.8	Peptidylprolyl isomerase.			GO:0005515
QTL_Mo_11_10908469			Phvul.011G101200	Chr11	10877084	10877518	-1	PTHR22952//PTHR22952:SF113 - CAMP-RESPONSE ELEMENT BINDING PROTEIN-RELATED // SUBFAMILY NOT NAMED			PTHR22952	CAMP-RESPONSE ELEMENT BINDING PROTEIN-RELATED
QTL_Mo_11_10908469			Phvul.011G101300	Chr11	10883022	10888102	1	K06676 - condensin complex subunit 2 (BRRN1, BRN1, CAPH)	PF05786	Condensin complex subunit 2	PTHR13108	FAMILY NOT NAMED	KOG2328	Chromosome condensation complex Condensin, subunit H			K06676	condensin complex subunit 2	GO:0007076
QTL_Mo_11_10908469			Phvul.011G101400	Chr11	10889492	10892194	-1	PF06364 - Protein of unknown function (DUF1068) (DUF1068)	PF06364	Protein of unknown function (DUF1068)	PTHR32254	FAMILY NOT NAMED
QTL_Mo_11_10908469			Phvul.011G101500	Chr11	10895726	10903784	-1		PF03552	Cellulose synthase	PTHR13301	X-BOX TRANSCRIPTION FACTOR-RELATED			EC 2.4.1.12	Cellulose synthase (UDP-forming).			GO:0030244
QTL_Mo_11_10908469			Phvul.011G101601	Chr11	10911215	10911811	1				PTHR35119
QTL_Mo_11_10908469			Phvul.011G101700	Chr11	10953524	10966980	-1		PF03552	Cellulose synthase	PTHR13301	X-BOX TRANSCRIPTION FACTOR-RELATED			EC 2.4.1.12	Cellulose synthase (UDP-forming).			GO:0030244
QTL_Mo_11_10908469			Phvul.011G101750	Chr11	10967228	10970278	1								EC 2.7.1.107	Diacylglycerol kinase.
QTL_Mo_11_10908469			Phvul.011G101800	Chr11	10972052	10976127	1	K01061 - carboxymethylenebutenolidase (E3.1.1.45)	PF12695	Alpha/beta hydrolase family	PTHR17630	DIENELACTONE HYDROLASE	KOG3043	Predicted hydrolase related to dienelactone hydrolase			K01061	carboxymethylenebutenolidase [EC:3.1.1.45]
QTL_Mo_11_10908469			Phvul.011G101900	Chr11	10980814	10983927	1	PF03106 - WRKY DNA -binding domain (WRKY) (1 of 91)	PF03106	WRKY DNA -binding domain	PTHR31429	FAMILY NOT NAMED							GO:0043565
QTL_Mo_11_11345383			Phvul.011G102200	Chr11	11284914	11287683	-1	PTHR12701:SF18 - 4D656-RELATED	PF05529	B-cell receptor-associated protein 31-like	PTHR12701	BCR-ASSOCIATED PROTEIN, BAP	KOG1962	B-cell receptor-associated protein and related proteins			K14009	B-cell receptor-associated protein 31	GO:0016021
QTL_Mo_11_11345383	QTL_Mo_11_11415382		Phvul.011G102300	Chr11	11316638	11317168	-1	PTHR21495//PTHR21495:SF78 - NUCLEOPORIN-RELATED // SUBFAMILY NOT NAMED	PF03018	Dirigent-like protein	PTHR21495	NUCLEOPORIN-RELATED
QTL_Mo_11_11345383	QTL_Mo_11_11415382		Phvul.011G102400	Chr11	11341510	11342875	-1
QTL_Mo_11_11345383	QTL_Mo_11_11415382		Phvul.011G102500	Chr11	11388457	11393199	-1	PTHR11709//PTHR11709:SF106 - MULTI-COPPER OXIDASE // SUBFAMILY NOT NAMED	PF07731	Multicopper oxidase	PTHR11709	MULTI-COPPER OXIDASE			EC 1.10.3.2	Laccase.			GO:0055114
QTL_Mo_11_11345383	QTL_Mo_11_11415382		Phvul.011G102600	Chr11	11396464	11401558	1	K17605 - serine/threonine-protein phosphatase 2A activator (PPP2R4, PTPA)	PF03095	Phosphotyrosyl phosphate activator (PTPA) protein	PTHR10012	SERINE/THREONINE-PROTEIN PHOSPHATASE 2A REGULATORY SUBUNIT B	KOG2867	Phosphotyrosyl phosphatase activator	EC 5.2.1.8	Peptidylprolyl isomerase.	K17605	0	GO:0019211
QTL_Mo_11_11345383	QTL_Mo_11_11415382		Phvul.011G102700	Chr11	11414199	11415153	1	K09875 - aquaporin SIP (SIP)	PF00230	Major intrinsic protein	PTHR19139	AQUAPORIN TRANSPORTER	KOG0223	Aquaporin (major intrinsic protein family)			K09875	aquaporin SIP	GO:0016020
	QTL_Mo_11_11415382		Phvul.011G102800	Chr11	11446263	11446829	1	2.4.1.299 - Cyanidin 3-O-glucoside 5-O-glucosyltransferase (acyl-glucose)	PF00232	Glycosyl hydrolase family 1	PTHR10353	GLYCOSYL HYDROLASE			EC 2.4.1.299	Cyanidin 3-O-glucoside 5-O-glucosyltransferase (acyl-glucose).			GO:0005975
	QTL_Mo_11_11415382		Phvul.011G102900	Chr11	11457165	11457787	1
	QTL_Mo_11_11415382		Phvul.011G103000	Chr11	11477137	11481890	1	3.4.24.85 - S2P endopeptidase / Sterol-regulatory element-binding proteins intramembrane protease	PF02163	Peptidase family M50	PTHR22939	SERINE PROTEASE FAMILY S1C HTRA-RELATED			EC 3.4.24.85	S2P endopeptidase.			GO:0006508
	QTL_Mo_11_11415382		Phvul.011G103100	Chr11	11497665	11499369	1				PTHR33386
	QTL_Mo_11_11415382		Phvul.011G103200	Chr11	11508678	11508959	1				PTHR33386
	QTL_Mo_11_11415382		Phvul.011G103300	Chr11	11510662	11513013	-1		PF04110	Ubiquitin-like autophagy protein Apg12	PTHR10969	MICROTUBULE-ASSOCIATED PROTEINS 1A/1B LIGHT CHAIN 3-RELATED	KOG1654	Microtubule-associated anchor protein involved in autophagy and membrane trafficking			K08341	GABA(A) receptor-associated protein (autophagy-related protein 8)	GO:0005737
QTL_Mo_11_13856025			Phvul.011G109500	Chr11	13797351	13802308	1	PTHR10641//PTHR10641:SF541 - MYB-LIKE DNA-BINDING PROTEIN MYB // SUBFAMILY NOT NAMED	PF00249	Myb-like DNA-binding domain	PTHR10641	MYB-LIKE DNA-BINDING PROTEIN MYB	KOG0048	Transcription factor, Myb superfamily			K09422	myb proto-oncogene protein, plant
QTL_Mo_11_13856025			Phvul.011G109600	Chr11	13843615	13845072	1	PTHR10641//PTHR10641:SF584 - MYB-LIKE DNA-BINDING PROTEIN MYB // SUBFAMILY NOT NAMED	PF00249	Myb-like DNA-binding domain	PTHR10641	MYB-LIKE DNA-BINDING PROTEIN MYB	KOG0048	Transcription factor, Myb superfamily			K09422	myb proto-oncogene protein, plant
QTL_Mo_11_13856025			Phvul.011G109700	Chr11	13886842	13888334	1	PTHR10641//PTHR10641:SF584 - MYB-LIKE DNA-BINDING PROTEIN MYB // SUBFAMILY NOT NAMED	PF00249	Myb-like DNA-binding domain	PTHR10641	MYB-LIKE DNA-BINDING PROTEIN MYB					K09422	myb proto-oncogene protein, plant
QTL_Mg_11_19327905			Phvul.011G118300	Chr11	19268638	19270792	-1	PTHR11439//PTHR11439:SF192 - GAG-POL-RELATED RETROTRANSPOSON // SUBFAMILY NOT NAMED	PF14223	gag-polypeptide of LTR copia-type	PTHR11439	GAG-POL-RELATED RETROTRANSPOSON
QTL_Mg_11_19327905			Phvul.011G118200	Chr11	19394676	19397664	-1	PTHR22835:SF184 - GDSL ESTERASE/LIPASE EXL1-RELATED	PF00657	GDSL-like Lipase/Acylhydrolase	PTHR22835	ZINC FINGER FYVE DOMAIN CONTAINING PROTEIN			EC 3.1.1.3	Triacylglycerol lipase.			GO:0016788
QTL_Mn_11_33811979			Phvul.011G136601	Chr11	33794787	33795533	1	2.4.1.297 - Anthocyanidin 3-O-glucoside 2''-O-glucosyltransferase			PTHR11926	GLUCOSYL/GLUCURONOSYL TRANSFERASES			EC 2.4.1.297	Anthocyanidin 3-O-glucoside 2''-O-glucosyltransferase.			GO:0016758
QTL_Mn_11_33811979			Phvul.011G130500	Chr11	33819549	33824284	-1	K02116 - ATP synthase protein I (atpI)			PTHR34118						K02116	ATP synthase protein I
QTL_Mn_11_33811979			Phvul.011G130600	Chr11	33824821	33825923	-1	PF05641 - Agenet domain (Agenet)	PF05641	Agenet domain	PTHR31917	FAMILY NOT NAMED
QTL_Mn_11_33811979			Phvul.011G130700	Chr11	33859805	33860853	-1	PF05641 - Agenet domain (Agenet)	PF05641	Agenet domain	PTHR31917	FAMILY NOT NAMED
QTL_Mn_11_33811979			Phvul.011G130800	Chr11	33887226	33888337	-1	3.4.22.33 - Fruit bromelain	PF08246	Cathepsin propeptide inhibitor domain (I29)	PTHR12411	CYSTEINE PROTEASE FAMILY C1-RELATED	KOG1543	Cysteine proteinase Cathepsin L	EC 3.4.22.33	Fruit bromelain.			GO:0008234
QTL_Mn_11_33811979			Phvul.011G130900	Chr11	33889361	33890470	1	3.4.22.33 - Fruit bromelain	PF08246	Cathepsin propeptide inhibitor domain (I29)	PTHR12411	CYSTEINE PROTEASE FAMILY C1-RELATED	KOG1543	Cysteine proteinase Cathepsin L	EC 3.4.22.33	Fruit bromelain.			GO:0008234
